# Supplementary material for: Roles of halide anions in the structural diversity of Zn(ii) complexes containing the flexible N,N′-di(4-pyridyl)adipoamide ligand
Source: Royal Society of Chemistry journal article supplement (doi:10.1039/b918484h), 2010-01-01

**Fig. S1(a).** The (a) simulated and (b) measured XRPD patterns of complex **2** and the (c) simulated XRPD patterns of complex **5**. (d) The measured XRPD pattern of the product obtained by refluxing **2** in DMF.

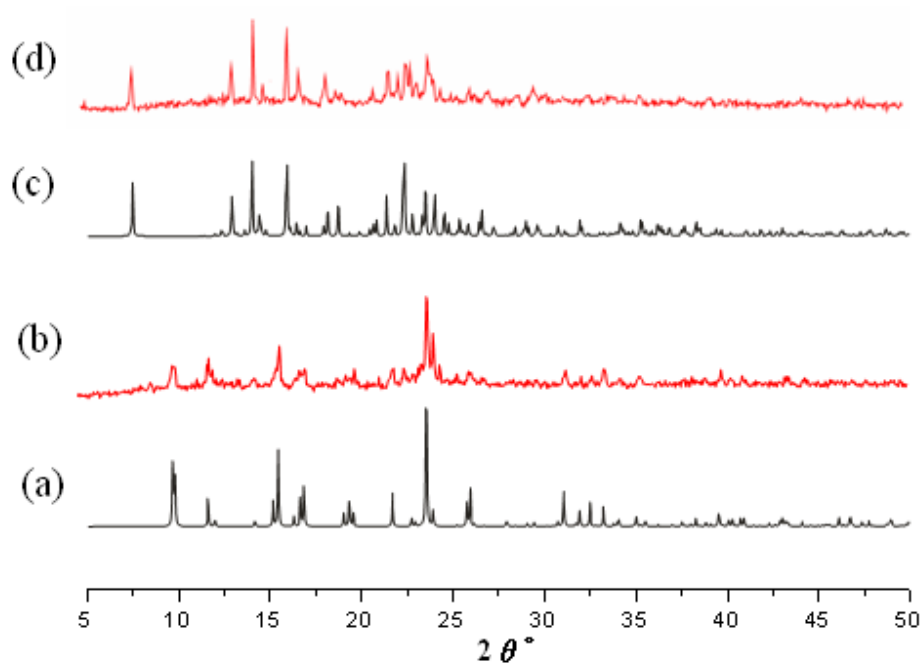

**Fig. S1(b).** The (a) simulated and (b) measured XRPD patterns of complex **3** and the (c) simulated XRPD patterns of complex **6**. (d) The measured XRPD pattern of the product obtained by refluxing **3** in DMF.

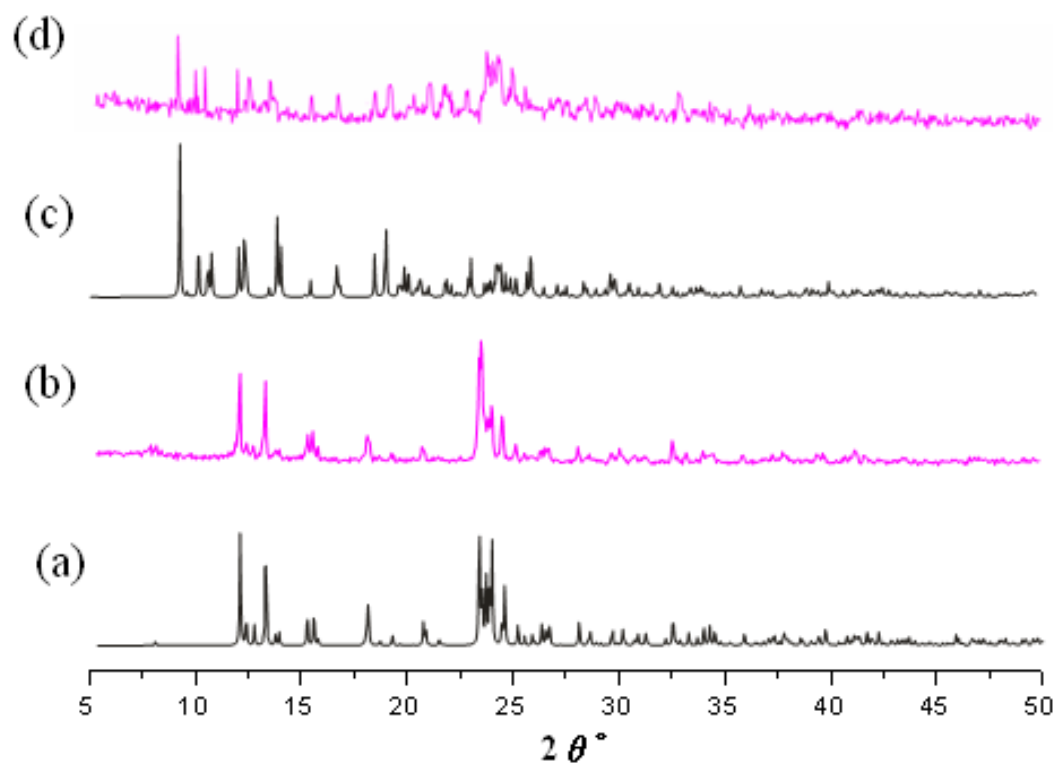

**Fig. S2.** The TGA curves for complexes **1 – 6**.

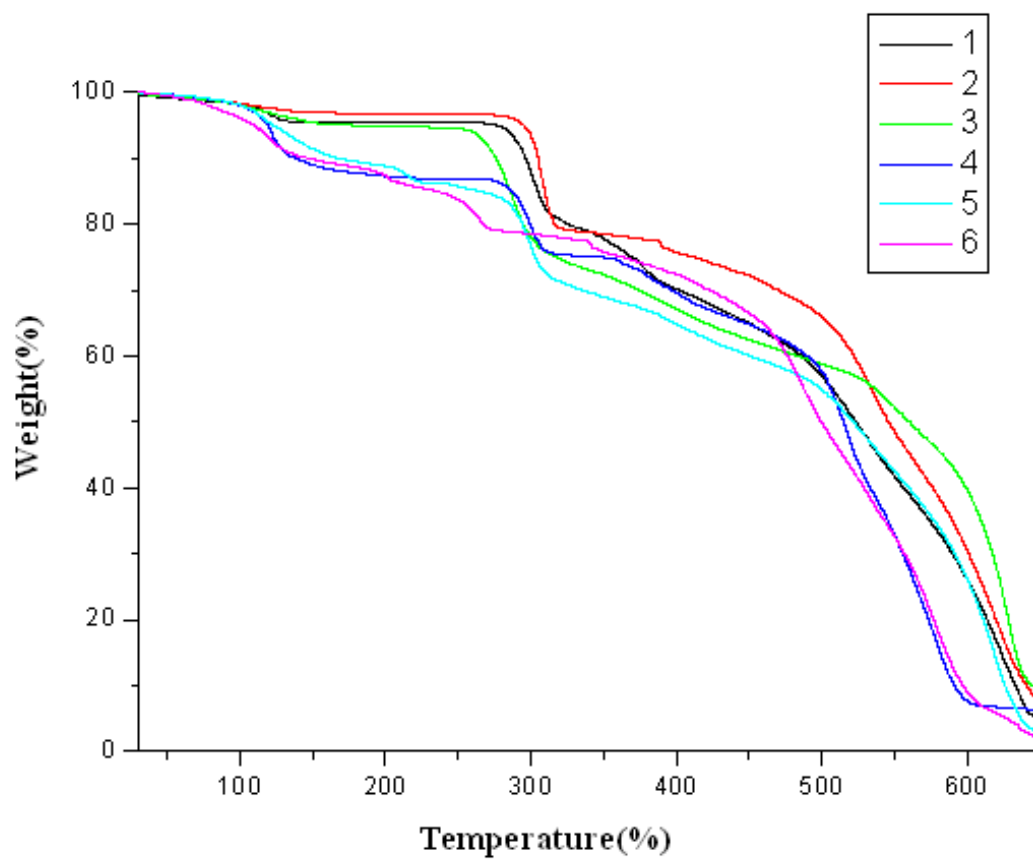

**Fig. S3.** Tables of Cartesian coordinates and HOMO and LUMO orbital compositions and diagrams for **1 - 6**

Cartesian coordinates

**1:**

|      |           |           |          |
|------|-----------|-----------|----------|
| ZNA  | 0.00000   | 0.00000   | 0.00000  |
| ZN   | -15.31040 | -8.90578  | 5.14175  |
| CL   | -14.46088 | -9.13684  | 7.19018  |
| CLA  | -16.15995 | -10.79525 | 4.31764  |
| CLB  | -0.84955  | 1.88951   | 0.82408  |
| CLC  | 0.84952   | 0.23110   | -2.04845 |
| O1   | -10.61922 | -8.48366  | -0.25555 |
| N1   | -13.87998 | -8.28436  | 3.85198  |
| N2   | -10.77848 | -6.92863  | 1.38494  |
| H2A  | -10.43310 | -6.25975  | 1.73240  |
| C1   | -13.60831 | -8.90145  | 2.69035  |
| H1A  | -14.13367 | -9.63066  | 2.45124  |
| C2   | -12.60265 | -8.52333  | 1.83233  |
| H2C  | -12.45060 | -8.98940  | 1.04203  |
| C3   | -11.81696 | -7.42526  | 2.17538  |
| C4   | -12.09304 | -6.77839  | 3.37395  |
| H4A  | -11.59193 | -6.03818  | 3.63058  |
| C5   | -13.10644 | -7.23468  | 4.17712  |
| H5A  | -13.26551 | -6.79825  | 4.98281  |
| C6   | -10.23352 | -7.45616  | 0.23897  |
| C7   | -9.13437  | -6.60401  | -0.34276 |
| H7A  | -8.60140  | -6.25099  | 0.38677  |
| H7B  | -9.53978  | -5.84991  | -0.79870 |
| C8   | -8.21170  | -7.30830  | -1.31140 |
| H8A  | -8.73173  | -7.64167  | -2.05927 |
| H8B  | -7.80768  | -8.07025  | -0.86744 |
| O1A  | -20.00157 | -4.02051  | 7.47479  |
| N1A  | -16.74084 | -7.47812  | 5.24854  |
| N2A  | -19.84236 | -4.66372  | 5.30787  |
| H2AA | -20.18765 | -4.63013  | 4.55491  |
| C1A  | -17.01254 | -6.78069  | 6.36371  |
| H1AA | -16.48713 | -6.93811  | 7.11477  |

|      |           |          |          |
|------|-----------|----------|----------|
| C2A  | -18.01815 | -5.84851 | 6.46518  |
| H2CA | -18.17024 | -5.39720 | 7.26401  |
| C3A  | -18.80381 | -5.59655 | 5.34273  |
| C4A  | -18.52779 | -6.31107 | 4.18326  |
| H4AA | -19.02890 | -6.16328 | 3.41389  |
| C5A  | -17.51435 | -7.23486 | 4.17691  |
| H5AA | -17.35526 | -7.71443 | 3.39607  |
| C6A  | -20.38727 | -3.93510 | 6.33770  |
| C7A  | -21.48645 | -3.00518 | 5.89059  |
| H7AA | -22.01945 | -3.46049 | 5.22009  |
| H7BA | -21.08100 | -2.23320 | 5.46552  |
| C8A  | -22.40912 | -2.51845 | 6.98487  |
| H8AA | -21.88909 | -2.03748 | 7.64752  |
| H8BA | -22.81316 | -3.28398 | 7.42272  |
| O1B  | -4.69117  | -4.88525 | -2.33306 |
| N1B  | -1.43044  | -1.42762 | -0.10682 |
| N2B  | -4.53196  | -4.24203 | -0.16615 |
| H2AB | -4.87725  | -4.27562 | 0.58681  |
| C1B  | -1.70214  | -2.12506 | -1.22198 |
| H1AB | -1.17673  | -1.96764 | -1.97304 |
| C2B  | -2.70775  | -3.05724 | -1.32345 |
| H2CB | -2.85984  | -3.50855 | -2.12229 |
| C3B  | -3.49341  | -3.30920 | -0.20101 |
| C4B  | -3.21739  | -2.59467 | 0.95847  |
| H4AB | -3.71850  | -2.74247 | 1.72783  |
| C5B  | -2.20395  | -1.67089 | 0.96482  |
| H5AB | -2.04486  | -1.19131 | 1.74566  |
| C6B  | -5.07687  | -4.97065 | -1.19597 |
| C7B  | -6.17605  | -5.90058 | -0.74886 |
| H7AB | -6.70905  | -5.44526 | -0.07836 |
| H7BB | -5.77060  | -6.67256 | -0.32380 |
| C8B  | -7.09872  | -6.38731 | -1.84315 |
| H8AB | -6.57869  | -6.86827 | -2.50580 |
| H8BB | -7.50276  | -5.62177 | -2.28100 |
| O1C  | -25.92963 | -0.42215 | 5.39727  |
| N1C  | -29.19036 | -0.62133 | 1.28976  |
| N2C  | -26.08884 | -1.97715 | 3.75677  |
| H2AC | -25.74355 | -2.64603 | 3.40938  |
| C1C  | -28.91866 | -0.00428 | 2.45134  |
| H1AC | -29.44407 | 0.72486  | 2.69054  |

|      |           |          |         |
|------|-----------|----------|---------|
| C2C  | -27.91305 | -0.38250 | 3.30937 |
| H2CC | -27.76096 | 0.08366  | 4.09963 |
| C3C  | -27.12739 | -1.48054 | 2.96635 |
| C4C  | -27.40341 | -2.12742 | 1.76781 |
| H4AC | -26.90230 | -2.86760 | 1.51112 |
| C5C  | -28.41685 | -1.67102 | 0.96462 |
| H5AC | -28.57594 | -2.10746 | 0.15887 |
| C6C  | -25.54393 | -1.44961 | 4.90269 |
| C7C  | -24.44475 | -2.30177 | 5.48447 |
| H7AC | -23.91175 | -2.65478 | 4.75491 |
| H7BC | -24.85020 | -3.05588 | 5.94050 |
| C8C  | -23.52208 | -1.59746 | 6.45314 |
| H8AC | -24.04211 | -1.26407 | 7.20099 |
| H8BC | -23.11803 | -0.83550 | 6.00909 |
| TV   | -30.62080 | 0.00000  | 0.00000 |

2:

|     |           |          |          |
|-----|-----------|----------|----------|
| ZNA | 0.00000   | 0.00000  | 0.00000  |
| ZN  | -15.31960 | -3.19301 | 9.65473  |
| BR  | -16.20564 | -5.26478 | 10.34981 |
| BRA | -14.43354 | -1.94414 | 11.44795 |
| BRB | 0.88606   | -1.24886 | -1.79324 |
| BRC | -0.88606  | 2.07178  | -0.69504 |
| O1  | -10.59690 | -6.48941 | 5.43122  |
| N1  | -13.86860 | -3.58477 | 8.29629  |
| N2  | -10.75078 | -4.23933 | 5.58584  |
| H2A | -10.40294 | -3.51206 | 5.28640  |
| C5  | -13.10999 | -2.58559 | 7.81450  |
| H1A | -13.29090 | -1.71755 | 8.09496  |
| C4  | -12.08249 | -2.78452 | 6.92960  |
| H2B | -11.58512 | -2.06366 | 6.61676  |
| C3  | -11.79196 | -4.07689 | 6.50465  |
| C2  | -12.55923 | -5.10183 | 7.01261  |
| H4A | -12.38838 | -5.98231 | 6.76674  |
| C1  | -13.56647 | -4.81490 | 7.87498  |
| H5A | -14.08021 | -5.52165 | 8.19353  |
| C6  | -10.20610 | -5.40528 | 5.09481  |
| C7  | -9.14847  | -5.16969 | 4.06350  |
| H7A | -8.62229  | -4.40055 | 4.33267  |
| H7B | -9.58122  | -4.94788 | 3.22421  |

|      |           |          |          |
|------|-----------|----------|----------|
| C8   | -8.21406  | -6.32951 | 3.82784  |
| H8A  | -8.72431  | -7.08806 | 3.50359  |
| H8B  | -7.80480  | -6.58418 | 4.66957  |
| O1A  | -20.04234 | 1.97156  | 8.22948  |
| N1A  | -16.77054 | -2.06856 | 8.79770  |
| N2A  | -19.88841 | 0.07298  | 7.01207  |
| H2AA | -20.23624 | -0.33237 | 6.33806  |
| C5A  | -17.52920 | -2.58346 | 7.81523  |
| H1AA | -17.34827 | -3.44758 | 7.52287  |
| C4A  | -18.55669 | -1.89613 | 7.22348  |
| H2BA | -19.05413 | -2.28829 | 6.54243  |
| C3A  | -18.84725 | -0.60523 | 7.65274  |
| C2A  | -18.07994 | -0.08533 | 8.67167  |
| H4AA | -18.25082 | 0.76821  | 8.99928  |
| C1A  | -17.07279 | -0.82977 | 9.19292  |
| H5AA | -16.55899 | -0.45233 | 9.87013  |
| C6A  | -20.43307 | 1.30182  | 7.31291  |
| C7A  | -21.49071 | 1.72755  | 6.34456  |
| H7AA | -22.01690 | 0.94957  | 6.10204  |
| H7BA | -21.05802 | 2.04985  | 5.53852  |
| C8A  | -22.42516 | 2.79918  | 6.84693  |
| H8AA | -21.91486 | 3.60142  | 7.03885  |
| H8BA | -22.83435 | 2.50174  | 7.67451  |
| O1B  | -4.72274  | -5.16457 | 1.42524  |
| N1B  | -1.45094  | -1.12444 | 0.85701  |
| N2B  | -4.56881  | -3.26599 | 2.64265  |
| H2AB | -4.91664  | -2.86064 | 3.31666  |
| C5B  | -2.20960  | -0.60955 | 1.83949  |
| H1AB | -2.02867  | 0.25458  | 2.13185  |
| C4B  | -3.23709  | -1.29688 | 2.43124  |
| H2BB | -3.73453  | -0.90472 | 3.11229  |
| C3B  | -3.52765  | -2.58778 | 2.00198  |
| C2B  | -2.76034  | -3.10768 | 0.98305  |
| H4AB | -2.93122  | -3.96122 | 0.65544  |
| C1B  | -1.75319  | -2.36324 | 0.46179  |
| H5AB | -1.23939  | -2.74068 | -0.21541 |
| C6B  | -5.11347  | -4.49483 | 2.34181  |
| C7B  | -6.17111  | -4.92057 | 3.31016  |
| H7AB | -6.69730  | -4.14258 | 3.55269  |
| H7BB | -5.73842  | -5.24287 | 4.11621  |

|      |           |          |         |
|------|-----------|----------|---------|
| C8B  | -7.10556  | -5.99220 | 2.80779 |
| H8AB | -6.59526  | -6.79443 | 2.61587 |
| H8BB | -7.51475  | -5.69476 | 1.98022 |
| O1C  | -25.91646 | 3.29642  | 4.22347 |
| N1C  | -29.18826 | 0.39172  | 1.35846 |
| N2C  | -26.07039 | 1.04635  | 4.06884 |
| H2AC | -25.72256 | 0.31907  | 4.36827 |
| C5C  | -28.42960 | -0.60742 | 1.84021 |
| H1AC | -28.61053 | -1.47547 | 1.55971 |
| C4C  | -27.40211 | -0.40844 | 2.72508 |
| H2BC | -26.90467 | -1.12933 | 3.03803 |
| C3C  | -27.11155 | 0.88386  | 3.15013 |
| C2C  | -27.87886 | 1.90876  | 2.64210 |
| H4AC | -27.70798 | 2.78932  | 2.88799 |
| C1C  | -28.88601 | 1.62189  | 1.77977 |
| H5AC | -29.39981 | 2.32867  | 1.46114 |
| C6C  | -25.52573 | 2.21226  | 4.55999 |
| C7C  | -24.46809 | 1.97669  | 5.59123 |
| H7AC | -23.94190 | 1.20751  | 5.32208 |
| H7BC | -24.90078 | 1.75486  | 6.43050 |
| C8C  | -23.53364 | 3.13654  | 5.82685 |
| H8AC | -24.04394 | 3.89502  | 6.15109 |
| H8BC | -23.12445 | 3.39117  | 4.98512 |
| TV   | -30.63920 | -0.00000 | 0.00000 |

**3:**

|     |          |          |          |
|-----|----------|----------|----------|
| ZN  | 0.00000  | 0.00000  | 0.00000  |
| I1  | -1.59947 | -1.49130 | -1.32058 |
| I2  | 1.62312  | 1.55208  | -1.19994 |
| O1  | -3.72356 | 1.60184  | 5.81868  |
| O2  | -5.60748 | 8.12562  | 6.08934  |
| N1  | -1.04284 | 1.11392  | 1.39399  |
| N2  | -2.43549 | 3.13634  | 4.78650  |
| H2A | -2.13212 | 3.93860  | 4.84945  |
| N3  | -7.18447 | 6.80329  | 5.16372  |
| H3A | -7.60444 | 6.05884  | 5.25868  |
| N4  | -8.34184 | 8.80686  | 1.67902  |
| C1  | -0.61280 | 2.31538  | 1.75725  |
| H1A | 0.04944  | 2.71312  | 1.23944  |
| C2  | -1.06681 | 2.99467  | 2.81828  |



|      |          |          |         |
|------|----------|----------|---------|
| H2B  | -0.73202 | 3.84103  | 3.00929 |
| C3   | -2.05607 | 2.42001  | 3.64561 |
| C4   | -2.55557 | 1.17902  | 3.24070 |
| H4B  | -3.23799 | 0.77152  | 3.72355 |
| C5   | -2.03811 | 0.56392  | 2.13121 |
| H5A  | -2.38238 | -0.26105 | 1.87470 |
| C6   | -3.22623 | 2.71306  | 5.80522 |
| C7   | -3.43661 | 3.71469  | 6.89351 |
| H7A  | -2.67645 | 4.31563  | 6.93742 |
| H7B  | -3.51362 | 3.26019  | 7.74698 |
| C8   | -4.72741 | 4.52307  | 6.61263 |
| H8A  | -4.64739 | 4.95283  | 5.74670 |
| H8B  | -5.47899 | 3.91130  | 6.57073 |
| C9   | -5.00523 | 5.55694  | 7.63895 |
| H9A  | -4.28572 | 6.20747  | 7.64331 |
| H9B  | -5.03804 | 5.14052  | 8.51442 |
| C10  | -6.32674 | 6.26644  | 7.36667 |
| H10A | -7.02254 | 5.59747  | 7.27053 |
| H10B | -6.54944 | 6.81142  | 8.13758 |
| C11  | -6.33130 | 7.11951  | 6.17484 |
| C12  | -7.47774 | 7.50170  | 4.00371 |
| C13  | -8.51372 | 7.01579  | 3.26639 |
| H13A | -8.94300 | 6.23200  | 3.52382 |
| C14  | -8.92454 | 7.69188  | 2.13428 |
| H14A | -9.64901 | 7.35201  | 1.66043 |
| C15  | -7.31962 | 9.24580  | 2.38271 |
| H15A | -6.88708 | 10.01452 | 2.08797 |
| C16  | -6.83823 | 8.62716  | 3.55292 |
| H16A | -6.10501 | 8.97355  | 4.00825 |
| TV   | -9.32233 | 9.97520  | 0.29508 |

4:

|     |         |          |          |
|-----|---------|----------|----------|
| ZN  | 4.14232 | -6.08754 | 0.51684  |
| CL1 | 4.84195 | -7.23141 | -1.27852 |
| CL2 | 4.72822 | -6.87194 | 2.49449  |
| O1  | 4.25564 | 0.95883  | 1.36267  |
| O2  | 2.58862 | 5.88678  | 1.87686  |
| N1  | 4.66300 | -4.14504 | 0.25131  |
| N2  | 5.08496 | -0.05792 | -0.49497 |
| H2A | 5.45560 | 0.11745  | -1.25091 |

|      |          |          |          |
|------|----------|----------|----------|
| N3   | 2.07029  | 6.26361  | -0.29245 |
| H3A  | 2.42455  | 6.45345  | -1.05275 |
| N4   | -2.10144 | 6.05837  | -0.45036 |
| C1   | 5.19346  | -3.67407 | -0.88847 |
| H1A  | 5.45852  | -4.28040 | -1.54193 |
| C2   | 5.35994  | -2.33223 | -1.12717 |
| H2B  | 5.73703  | -2.04908 | -1.92875 |
| C3   | 4.97069  | -1.39877 | -0.18376 |
| C4   | 4.46557  | -1.88107 | 1.02647  |
| H4B  | 4.23111  | -1.29615 | 1.71043  |
| C5   | 4.32307  | -3.23708 | 1.18355  |
| H5A  | 3.96901  | -3.54780 | 1.98541  |
| C6   | 4.68975  | 1.02746  | 0.23379  |
| C7   | 4.85210  | 2.33318  | -0.51531 |
| H7A  | 4.27229  | 2.32159  | -1.29286 |
| H7B  | 5.76677  | 2.40073  | -0.83100 |
| C8   | 4.53027  | 3.55972  | 0.31586  |
| H8A  | 5.06953  | 3.55033  | 1.12210  |
| H8B  | 3.59742  | 3.53131  | 0.58018  |
| C9   | 4.79515  | 4.84445  | -0.44882 |
| H9A  | 4.29671  | 4.82393  | -1.28071 |
| H9B  | 5.73841  | 4.88995  | -0.67039 |
| C10  | 4.40614  | 6.10628  | 0.33360  |
| H10A | 4.95844  | 6.17333  | 1.12818  |
| H10B | 4.57560  | 6.88813  | -0.21493 |
| C11  | 2.95104  | 6.08685  | 0.73802  |
| C12  | 0.68214  | 6.17967  | -0.28448 |
| C13  | 0.02038  | 6.38094  | -1.48735 |
| H13A | 0.50300  | 6.56331  | -2.26112 |
| C14  | -1.33843 | 6.31029  | -1.52984 |
| H14A | -1.76141 | 6.44303  | -2.34738 |
| C15  | -1.43470 | 5.86710  | 0.69737  |
| H15A | -1.93750 | 5.69679  | 1.46098  |
| C16  | -0.08002 | 5.90229  | 0.83412  |
| H16A | 0.32111  | 5.74393  | 1.65808  |
| ZNA  | -4.14232 | 6.08754  | -0.51684 |
| CL1A | -4.84193 | 7.23143  | 1.27849  |
| CL2A | -4.72823 | 6.87199  | -2.49456 |
| O1A  | -4.25563 | -0.95878 | -1.36270 |
| O2A  | -2.58863 | -5.88673 | -1.87691 |

|      |          |          |          |
|------|----------|----------|----------|
| N1A  | -4.66298 | 4.14506  | -0.25135 |
| N2A  | -5.08498 | 0.05797  | 0.49493  |
| H2AA | -5.45558 | -0.11745 | 1.25097  |
| N3A  | -2.07027 | -6.26362 | 0.29248  |
| H3AA | -2.42453 | -6.45341 | 1.05271  |
| N4A  | 2.10146  | -6.05827 | 0.45031  |
| C1A  | -5.19347 | 3.67416  | 0.88839  |
| H1AA | -5.45858 | 4.28050  | 1.54187  |
| C2A  | -5.35998 | 2.33227  | 1.12715  |
| H2BA | -5.73706 | 2.04908  | 1.92879  |
| C3A  | -4.97066 | 1.39877  | 0.18378  |
| C4A  | -4.46553 | 1.88113  | -1.02654 |
| H4BA | -4.23112 | 1.29623  | -1.71045 |
| C5A  | -4.32311 | 3.23710  | -1.18358 |
| H5AA | -3.96905 | 3.54784  | -1.98540 |
| C6A  | -4.68974 | -1.02738 | -0.23385 |
| C7A  | -4.85211 | -2.33318 | 0.51536  |
| H7AA | -4.27230 | -2.32159 | 1.29291  |
| H7BA | -5.76676 | -2.40068 | 0.83098  |
| C8A  | -4.53030 | -3.55975 | -0.31583 |
| H8AA | -5.06956 | -3.55034 | -1.12209 |
| H8BA | -3.59743 | -3.53127 | -0.58017 |
| C9A  | -4.79515 | -4.84443 | 0.44881  |
| H9AA | -4.29671 | -4.82392 | 1.28073  |
| H9BA | -5.73848 | -4.88987 | 0.67036  |
| C10A | -4.40610 | -6.10626 | -0.33360 |
| H10C | -4.95849 | -6.17334 | -1.12813 |
| H10D | -4.57565 | -6.88803 | 0.21486  |
| C11A | -2.95109 | -6.08679 | -0.73810 |
| C12A | -0.68216 | -6.17962 | 0.28442  |
| C13A | -0.02043 | -6.38097 | 1.48736  |
| H13B | -0.50298 | -6.56323 | 2.26107  |
| C14A | 1.33841  | -6.31029 | 1.52989  |
| H14B | 1.76143  | -6.44296 | 2.34734  |
| C15A | 1.43473  | -5.86706 | -0.69739 |
| H15B | 1.93748  | -5.69673 | -1.46101 |
| C16A | 0.08001  | -5.90222 | -0.83417 |
| H16B | -0.32109 | -5.74388 | -1.65814 |

|      |          |          |          |
|------|----------|----------|----------|
| ZN   | 4.44166  | 3.60243  | 4.58922  |
| BR1  | 6.75182  | 3.92682  | 4.15875  |
| BR2  | 3.60625  | 4.39604  | 6.63521  |
| O1   | -0.95621 | 4.63150  | 0.14072  |
| O2   | -4.95755 | 3.29338  | -2.87286 |
| N1   | 3.41459  | 4.30460  | 2.99713  |
| N2   | 1.19429  | 5.01736  | -0.47360 |
| H2NA | 1.67093  | 5.25722  | -1.14805 |
| N3   | -3.76132 | 2.56811  | -4.62851 |
| H3NA | -3.28476 | 2.84586  | -5.28834 |
| N4   | -4.11484 | -1.58304 | -4.53738 |
| C1   | 3.98361  | 4.72588  | 1.84754  |
| H1A  | 4.90733  | 4.83015  | 1.81986  |
| C2   | 3.25961  | 5.00542  | 0.72328  |
| H2A  | 3.69107  | 5.32122  | -0.03764 |
| C3   | 1.88803  | 4.82153  | 0.70981  |
| C4   | 1.28274  | 4.43786  | 1.89971  |
| H4A  | 0.35867  | 4.35098  | 1.95828  |
| C5   | 2.08359  | 4.19010  | 2.98752  |
| H5A  | 1.66867  | 3.92285  | 3.77576  |
| C6   | -0.14348 | 4.88144  | -0.71526 |
| C7   | -0.51402 | 5.08079  | -2.17457 |
| H7A  | -0.24324 | 5.97061  | -2.44986 |
| H7B  | -0.02322 | 4.44172  | -2.71459 |
| C8   | -1.99192 | 4.91378  | -2.43839 |
| H8A  | -2.48714 | 5.52898  | -1.87519 |
| H8B  | -2.25779 | 4.01197  | -2.19973 |
| C9   | -2.34862 | 5.16947  | -3.88571 |
| H9A  | -1.81368 | 4.58887  | -4.44931 |
| H9B  | -2.12417 | 6.08654  | -4.10821 |
| C10  | -3.82880 | 4.93216  | -4.19103 |
| H10A | -4.36300 | 5.57452  | -3.69822 |
| H10B | -3.98640 | 5.07691  | -5.13714 |
| C11  | -4.26415 | 3.54654  | -3.82580 |
| C12  | -3.90262 | 1.18654  | -4.54169 |
| C13  | -4.59943 | 0.54306  | -3.53952 |
| H13A | -5.00100 | 1.02173  | -2.85068 |
| C14  | -4.68107 | -0.82840 | -3.59189 |
| H14A | -5.16315 | -1.25985 | -2.92376 |

|      |          |          |          |
|------|----------|----------|----------|
| C15  | -3.43136 | -0.93850 | -5.48782 |
| H15A | -3.02792 | -1.43708 | -6.16128 |
| C16  | -3.30075 | 0.40901  | -5.51283 |
| H16A | -2.80357 | 0.81325  | -6.18683 |
| ZNA  | -4.44166 | -3.60243 | -4.58922 |
| BR1A | -6.75180 | -3.92684 | -4.15876 |
| BR2A | -3.60622 | -4.39609 | -6.63510 |
| O1A  | 0.95619  | -4.63156 | -0.14066 |
| O2A  | 4.95757  | -3.29338 | 2.87293  |
| N1A  | -3.41457 | -4.30462 | -2.99706 |
| N2A  | -1.19427 | -5.01739 | 0.47365  |
| H2NB | -1.67093 | -5.25726 | 1.14810  |
| N3A  | 3.76133  | -2.56811 | 4.62864  |
| H3NB | 3.28478  | -2.84586 | 5.28840  |
| N4A  | 4.11486  | 1.58300  | 4.53744  |
| C1A  | -3.98363 | -4.72587 | -1.84741 |
| H1AA | -4.90731 | -4.83018 | -1.81979 |
| C2A  | -3.25959 | -5.00545 | -0.72316 |
| H2AA | -3.69106 | -5.32124 | 0.03777  |
| C3A  | -1.88801 | -4.82156 | -0.70973 |
| C4A  | -1.28275 | -4.43788 | -1.89964 |
| H4AA | -0.35865 | -4.35096 | -1.95814 |
| C5A  | -2.08359 | -4.19014 | -2.98744 |
| H5AA | -1.66867 | -3.92286 | -3.77567 |
| C6A  | 0.14349  | -4.88145 | 0.71538  |
| C7A  | 0.51406  | -5.08082 | 2.17465  |
| H7AA | 0.24328  | -5.97067 | 2.44997  |
| H7BA | 0.02322  | -4.44171 | 2.71472  |
| C8A  | 1.99191  | -4.91384 | 2.43854  |
| H8AA | 2.48715  | -5.52903 | 1.87526  |
| H8BA | 2.25781  | -4.01203 | 2.19987  |
| C9A  | 2.34860  | -5.16944 | 3.88578  |
| H9AA | 1.81371  | -4.58883 | 4.44945  |
| H9BA | 2.12421  | -6.08656 | 4.10836  |
| C10A | 3.82878  | -4.93219 | 4.19104  |
| H10C | 4.36302  | -5.57451 | 3.69823  |
| H10D | 3.98644  | -5.07693 | 5.13724  |
| C11A | 4.26418  | -3.54651 | 3.82593  |
| C12A | 3.90261  | -1.18659 | 4.54176  |
| C13A | 4.59944  | -0.54311 | 3.53964  |

|      |         |          |         |
|------|---------|----------|---------|
| H13B | 5.00103 | -1.02178 | 2.85073 |
| C14A | 4.68107 | 0.82840  | 3.59193 |
| H14B | 5.16315 | 1.25988  | 2.92388 |
| C15A | 3.43137 | 0.93848  | 5.48792 |
| H15B | 3.02793 | 1.43703  | 6.16132 |
| C16A | 3.30074 | -0.40905 | 5.51295 |
| H16B | 2.80360 | -0.81322 | 6.18695 |

**6:**

|     |          |          |          |
|-----|----------|----------|----------|
| ZN  | 4.24758  | -5.67004 | 4.00270  |
| I1  | 3.45760  | -7.09049 | 5.96957  |
| I2  | 6.62424  | -5.90703 | 3.12837  |
| O1  | 0.82928  | -4.49440 | -2.04283 |
| O2  | -3.85843 | -1.39261 | -3.18798 |
| N1  | 2.96597  | -5.92191 | 2.42244  |
| N2  | 0.21633  | -6.21434 | -0.68932 |
| H2A | -0.35674 | -6.84850 | -0.59428 |
| N3  | -2.59812 | -0.27723 | -4.70920 |
| H3A | -1.98558 | -0.39804 | -5.30064 |
| N4  | -3.88761 | 3.69336  | -4.41114 |
| C1  | 1.75364  | -6.46748 | 2.57343  |
| H1A | 1.51864  | -6.79322 | 3.41222  |
| C2  | 0.85373  | -6.57010 | 1.57279  |
| H2B | 0.02884  | -6.96954 | 1.73060  |
| C3  | 1.15676  | -6.07892 | 0.30218  |
| C4  | 2.41071  | -5.49760 | 0.13172  |
| H4B | 2.65861  | -5.14483 | -0.69230 |
| C5  | 3.27430  | -5.45247 | 1.19463  |
| H5A | 4.11602  | -5.07931 | 1.06359  |
| C6  | 0.09749  | -5.43550 | -1.82350 |
| C7  | -1.01850 | -5.88494 | -2.72445 |
| H7A | -1.81879 | -6.01801 | -2.19272 |
| H7B | -0.78044 | -6.73818 | -3.11967 |
| C8  | -1.32729 | -4.87915 | -3.85176 |
| H8A | -0.49457 | -4.59898 | -4.26285 |
| H8B | -1.86039 | -5.31980 | -4.53185 |
| C9  | -2.06949 | -3.65717 | -3.35778 |
| H9A | -2.95822 | -3.91936 | -3.07092 |
| H9B | -1.60437 | -3.29191 | -2.58891 |

|      |          |          |          |
|------|----------|----------|----------|
| C10  | -2.18445 | -2.61097 | -4.39681 |
| H10A | -2.59412 | -3.00386 | -5.18339 |
| H10B | -1.29108 | -2.32624 | -4.64526 |
| C11  | -2.97731 | -1.39771 | -4.00471 |
| C12  | -3.07329 | 1.02124  | -4.59140 |
| C13  | -4.16304 | 1.38780  | -3.82360 |
| H13A | -4.65152 | 0.74589  | -3.36073 |
| C14  | -4.51340 | 2.71346  | -3.75458 |
| H14A | -5.23454 | 2.94431  | -3.21462 |
| C15  | -2.86035 | 3.32326  | -5.19861 |
| H15A | -2.42054 | 3.97898  | -5.69002 |
| C16  | -2.43494 | 2.03607  | -5.30988 |
| H16A | -1.71776 | 1.83081  | -5.86523 |
| ZNA  | -4.24758 | 5.67004  | -4.00270 |
| I1A  | -3.45762 | 7.09048  | -5.96956 |
| I2A  | -6.62428 | 5.90710  | -3.12841 |
| O1A  | -0.82927 | 4.49437  | 2.04281  |
| O2A  | 3.85842  | 1.39263  | 3.18794  |
| N1A  | -2.96600 | 5.92196  | -2.42244 |
| N2A  | -0.21636 | 6.21439  | 0.68933  |
| H2AA | 0.35671  | 6.84855  | 0.59426  |
| N3A  | 2.59812  | 0.27718  | 4.70916  |
| H3AA | 1.98555  | 0.39800  | 5.30061  |
| N4A  | 3.88757  | -3.69331 | 4.41115  |
| C1A  | -1.75366 | 6.46747  | -2.57342 |
| H1AA | -1.51863 | 6.79321  | -3.41224 |
| C2A  | -0.85375 | 6.57017  | -1.57285 |
| H2BA | -0.02883 | 6.96950  | -1.73060 |
| C3A  | -1.15677 | 6.07895  | -0.30216 |
| C4A  | -2.41073 | 5.49766  | -0.13176 |
| H4BA | -2.65864 | 5.14477  | 0.69229  |
| C5A  | -3.27435 | 5.45251  | -1.19468 |
| H5AA | -4.11602 | 5.07931  | -1.06360 |
| C6A  | -0.09748 | 5.43556  | 1.82347  |
| C7A  | 1.01845  | 5.88499  | 2.72441  |
| H7AA | 1.81876  | 6.01801  | 2.19270  |
| H7BA | 0.78042  | 6.73813  | 3.11965  |
| C8A  | 1.32727  | 4.87910  | 3.85176  |
| H8AA | 0.49455  | 4.59896  | 4.26282  |
| H8BA | 1.86039  | 5.31984  | 4.53187  |

|      |         |          |         |
|------|---------|----------|---------|
| C9A  | 2.06947 | 3.65720  | 3.35773 |
| H9AA | 2.95824 | 3.91931  | 3.07093 |
| H9BA | 1.60434 | 3.29193  | 2.58891 |
| C10A | 2.18442 | 2.61097  | 4.39676 |
| H10C | 2.59411 | 3.00392  | 5.18340 |
| H10D | 1.29105 | 2.32627  | 4.64526 |
| C11A | 2.97732 | 1.39778  | 4.00471 |
| C12A | 3.07326 | -1.02124 | 4.59135 |
| C13A | 4.16304 | -1.38781 | 3.82356 |
| H13B | 4.65152 | -0.74591 | 3.36071 |
| C14A | 4.51335 | -2.71347 | 3.75457 |
| H14B | 5.23454 | -2.94436 | 3.21462 |
| C15A | 2.86030 | -3.32326 | 5.19859 |
| H15B | 2.42052 | -3.97904 | 5.68999 |
| C16A | 2.43493 | -2.03611 | 5.30984 |
| H16B | 1.71775 | -1.83080 | 5.86519 |

#### HOMO and LUMO compositions

HOMO (#184) and LUMO(#185) for 1:

|                |       | 181      | 182      | 183      | 184      | 185      |
|----------------|-------|----------|----------|----------|----------|----------|
|                |       | O        | O        | O        | O        | V        |
| EIGENVALUES -- |       | -0.23902 | -0.23902 | -0.23234 | -0.23234 | -0.08766 |
| 1              | Zn 1S | 0.00213  | -0.00273 | 0.00000  | 0.00000  | 0.00219  |
| 2              | 2S    | 0.01198  | -0.01521 | 0.00000  | 0.00000  | 0.00671  |
| 3              | 3PX   | 0.00000  | 0.00000  | -0.00010 | 0.00388  | 0.00002  |
| 4              | 3PY   | 0.00039  | -0.00061 | 0.00000  | 0.00000  | 0.02445  |
| 5              | 3PZ   | 0.00000  | 0.00000  | 0.00072  | -0.02830 | 0.00000  |
| 6              | 4PX   | 0.00000  | 0.00000  | 0.00114  | -0.04539 | 0.00001  |
| 7              | 4PY   | -0.00516 | 0.00655  | 0.00000  | 0.00000  | -0.00358 |
| 8              | 4PZ   | 0.00000  | 0.00000  | -0.00236 | 0.09229  | 0.00000  |
| 9              | 5D 0  | 0.02794  | -0.03627 | 0.00000  | 0.00000  | 0.00480  |
| 10             | 5D+1  | 0.03258  | -0.04228 | 0.00000  | 0.00000  | -0.01405 |
| 11             | 5D-1  | 0.00000  | 0.00000  | -0.00195 | 0.07671  | -0.00002 |
| 12             | 5D+2  | -0.01936 | 0.02514  | 0.00000  | 0.00000  | -0.03272 |
| 13             | 5D-2  | 0.00000  | 0.00000  | 0.00094  | -0.03697 | 0.00000  |
| 14             | 6D 0  | 0.00466  | -0.00605 | 0.00000  | 0.00000  | 0.00072  |
| 15             | 6D+1  | 0.00572  | -0.00741 | 0.00000  | 0.00000  | -0.00226 |
| 16             | 6D-1  | 0.00000  | 0.00000  | -0.00032 | 0.01251  | 0.00000  |
| 17             | 6D+2  | -0.00289 | 0.00376  | 0.00000  | 0.00000  | -0.00491 |



|      |       |          |          |          |          |          |
|------|-------|----------|----------|----------|----------|----------|
| 18   | 6D-2  | 0.00000  | 0.00000  | 0.00014  | -0.00547 | 0.00000  |
| 19 2 | Zn 1S | -0.00276 | -0.00210 | 0.00000  | 0.00000  | 0.00219  |
| 20   | 2S    | -0.01546 | -0.01166 | 0.00000  | 0.00000  | 0.00671  |
| 21   | 3PX   | 0.00001  | 0.00000  | -0.00388 | -0.00010 | -0.00008 |
| 22   | 3PY   | 0.00053  | 0.00049  | 0.00000  | 0.00000  | -0.02438 |
| 23   | 3PZ   | 0.00000  | 0.00000  | -0.02830 | -0.00072 | 0.00000  |
| 24   | 4PX   | 0.00001  | 0.00001  | 0.04538  | 0.00116  | -0.00002 |
| 25   | 4PY   | -0.00666 | -0.00502 | 0.00000  | 0.00000  | 0.00358  |
| 26   | 4PZ   | 0.00000  | 0.00000  | 0.09228  | 0.00233  | 0.00000  |
| 27   | 5D 0  | -0.03627 | -0.02795 | 0.00000  | 0.00000  | 0.00479  |
| 28   | 5D+1  | 0.04229  | 0.03257  | 0.00000  | 0.00000  | 0.01402  |
| 29   | 5D-1  | 0.00000  | 0.00000  | -0.07671 | -0.00195 | 0.00005  |
| 30   | 5D+2  | 0.02514  | 0.01937  | 0.00000  | 0.00000  | -0.03264 |
| 31   | 5D-2  | 0.00000  | 0.00000  | -0.03697 | -0.00094 | -0.00001 |
| 32   | 6D 0  | -0.00605 | -0.00466 | 0.00000  | 0.00000  | 0.00072  |
| 33   | 6D+1  | 0.00742  | 0.00571  | 0.00000  | 0.00000  | 0.00226  |
| 34   | 6D-1  | 0.00000  | 0.00000  | -0.01252 | -0.00032 | 0.00001  |
| 35   | 6D+2  | 0.00375  | 0.00289  | 0.00000  | 0.00000  | -0.00490 |
| 36   | 6D-2  | 0.00000  | 0.00000  | -0.00547 | -0.00014 | 0.00000  |
| 37 3 | Cl 1S | -0.00031 | -0.00023 | 0.00897  | 0.00023  | -0.00259 |
| 38   | 2S    | 0.00097  | 0.00074  | 0.02439  | 0.00062  | -0.00607 |
| 39   | 3PX   | 0.25576  | 0.19703  | 0.14530  | 0.00369  | -0.00202 |
| 40   | 3PY   | -0.02377 | -0.01830 | -0.21481 | -0.00546 | -0.00281 |
| 41   | 3PZ   | -0.12359 | -0.09521 | 0.26125  | 0.00664  | -0.01248 |
| 42   | 4PX   | 0.29231  | 0.22520  | 0.15703  | 0.00399  | -0.00531 |
| 43   | 4PY   | -0.02701 | -0.02080 | -0.24485 | -0.00622 | -0.00376 |
| 44   | 4PZ   | -0.13833 | -0.10658 | 0.28434  | 0.00723  | -0.01687 |
| 45 4 | Cl 1S | -0.00031 | -0.00023 | -0.00897 | -0.00023 | -0.00258 |
| 46   | 2S    | 0.00096  | 0.00074  | -0.02439 | -0.00062 | -0.00604 |
| 47   | 3PX   | -0.25572 | -0.19700 | 0.14528  | 0.00369  | 0.00204  |
| 48   | 3PY   | -0.02378 | -0.01830 | 0.21481  | 0.00546  | -0.00277 |
| 49   | 3PZ   | 0.12357  | 0.09519  | 0.26124  | 0.00664  | 0.01243  |
| 50   | 4PX   | -0.29227 | -0.22517 | 0.15701  | 0.00399  | 0.00534  |
| 51   | 4PY   | -0.02702 | -0.02081 | 0.24484  | 0.00622  | -0.00371 |
| 52   | 4PZ   | 0.13831  | 0.10656  | 0.28433  | 0.00723  | 0.01680  |
| 53 5 | Cl 1S | 0.00024  | -0.00031 | -0.00023 | 0.00897  | -0.00259 |
| 54   | 2S    | -0.00075 | 0.00096  | -0.00062 | 0.02439  | -0.00607 |
| 55   | 3PX   | 0.19701  | -0.25574 | 0.00369  | -0.14529 | 0.00203  |
| 56   | 3PY   | -0.01832 | 0.02376  | -0.00546 | 0.21480  | 0.00280  |
| 57   | 3PZ   | 0.09520  | -0.12358 | -0.00664 | 0.26125  | -0.01249 |

|       |    |     |          |          |          |          |          |
|-------|----|-----|----------|----------|----------|----------|----------|
| 58    |    | 4PX | 0.22517  | -0.29229 | 0.00399  | -0.15701 | 0.00534  |
| 59    |    | 4PY | -0.02082 | 0.02702  | -0.00622 | 0.24484  | 0.00375  |
| 60    |    | 4PZ | 0.10655  | -0.13833 | -0.00723 | 0.28434  | -0.01689 |
| 61 6  | Cl | 1S  | 0.00024  | -0.00031 | 0.00023  | -0.00897 | -0.00259 |
| 62    |    | 2S  | -0.00075 | 0.00096  | 0.00062  | -0.02439 | -0.00606 |
| 63    |    | 3PX | -0.19702 | 0.25575  | 0.00369  | -0.14530 | -0.00204 |
| 64    |    | 3PY | -0.01831 | 0.02375  | 0.00546  | -0.21480 | 0.00279  |
| 65    |    | 3PZ | -0.09520 | 0.12358  | -0.00664 | 0.26125  | 0.01248  |
| 66    |    | 4PX | -0.22518 | 0.29231  | 0.00399  | -0.15703 | -0.00534 |
| 67    |    | 4PY | -0.02081 | 0.02700  | 0.00622  | -0.24483 | 0.00374  |
| 68    |    | 4PZ | -0.10656 | 0.13834  | -0.00723 | 0.28434  | 0.01687  |
| 69 7  | O  | 1S  | -0.00008 | -0.00007 | 0.00002  | 0.00000  | -0.00013 |
| 70    |    | 2S  | 0.00035  | 0.00032  | -0.00005 | -0.00001 | -0.00018 |
| 71    |    | 3S  | -0.00157 | -0.00146 | -0.00017 | 0.00002  | 0.00369  |
| 72    |    | 4PX | 0.00211  | 0.00158  | -0.00006 | 0.00001  | -0.07669 |
| 73    |    | 4PY | 0.00023  | 0.00025  | 0.00071  | 0.00001  | -0.08556 |
| 74    |    | 4PZ | 0.00013  | 0.00017  | 0.00067  | 0.00001  | -0.02868 |
| 75    |    | 5PX | 0.00180  | 0.00137  | 0.00023  | 0.00000  | -0.06104 |
| 76    |    | 5PY | -0.00013 | -0.00027 | 0.00042  | 0.00002  | -0.06592 |
| 77    |    | 5PZ | 0.00134  | 0.00103  | -0.00008 | 0.00002  | -0.02350 |
| 78 8  | N  | 1S  | -0.00157 | -0.00121 | -0.00049 | -0.00001 | -0.00259 |
| 79    |    | 2S  | 0.00344  | 0.00265  | 0.00086  | 0.00002  | 0.00629  |
| 80    |    | 3S  | 0.00917  | 0.00701  | 0.00274  | 0.00007  | 0.01785  |
| 81    |    | 4PX | 0.00046  | 0.00037  | -0.00456 | -0.00012 | -0.11157 |
| 82    |    | 4PY | -0.00917 | -0.00704 | -0.00846 | -0.00022 | -0.15160 |
| 83    |    | 4PZ | -0.00559 | -0.00430 | -0.00052 | -0.00001 | -0.02410 |
| 84    |    | 5PX | 0.00104  | 0.00079  | -0.00492 | -0.00013 | -0.10938 |
| 85    |    | 5PY | 0.00474  | 0.00369  | -0.01051 | -0.00026 | -0.13715 |
| 86    |    | 5PZ | -0.02422 | -0.01869 | -0.01491 | -0.00038 | -0.02086 |
| 87 9  | N  | 1S  | -0.00032 | -0.00025 | -0.00008 | 0.00000  | -0.00006 |
| 88    |    | 2S  | -0.00016 | -0.00011 | 0.00030  | 0.00001  | -0.00046 |
| 89    |    | 3S  | 0.00990  | 0.00757  | -0.00023 | -0.00005 | 0.00257  |
| 90    |    | 4PX | -0.00053 | -0.00037 | -0.00021 | -0.00001 | 0.02093  |
| 91    |    | 4PY | -0.00422 | -0.00324 | -0.00130 | -0.00003 | 0.02546  |
| 92    |    | 4PZ | -0.00035 | -0.00026 | 0.00029  | 0.00001  | 0.00579  |
| 93    |    | 5PX | 0.00226  | 0.00098  | -0.00240 | -0.00001 | 0.04016  |
| 94    |    | 5PY | -0.00188 | -0.00091 | -0.00038 | -0.00004 | 0.03548  |
| 95    |    | 5PZ | -0.01943 | -0.01415 | 0.00310  | -0.00003 | 0.01701  |
| 96 10 | H  | 1S  | -0.00133 | -0.00105 | -0.00060 | -0.00001 | 0.00263  |
| 97    |    | 2S  | -0.01106 | -0.00827 | -0.00242 | -0.00010 | 0.01490  |

|     |    |   |     |          |          |          |          |          |
|-----|----|---|-----|----------|----------|----------|----------|----------|
| 98  | 11 | C | 1S  | 0.00444  | 0.00342  | 0.00267  | 0.00007  | 0.00075  |
| 99  |    |   | 2S  | -0.00637 | -0.00495 | -0.00484 | -0.00012 | -0.00267 |
| 100 |    |   | 3S  | -0.04528 | -0.03474 | -0.03185 | -0.00080 | 0.00040  |
| 101 |    |   | 4PX | -0.01570 | -0.01209 | -0.01175 | -0.00030 | 0.09196  |
| 102 |    |   | 4PY | 0.01387  | 0.01068  | 0.00796  | 0.00020  | 0.11344  |
| 103 |    |   | 4PZ | -0.00740 | -0.00571 | -0.00998 | -0.00025 | 0.01772  |
| 104 |    |   | 5PX | 0.05202  | 0.03981  | 0.00201  | 0.00008  | 0.07455  |
| 105 |    |   | 5PY | -0.05638 | -0.04322 | 0.01302  | 0.00030  | 0.07953  |
| 106 |    |   | 5PZ | -0.02347 | -0.01816 | -0.04003 | -0.00100 | 0.01565  |
| 107 | 12 | H | 1S  | -0.00806 | -0.00622 | -0.00647 | -0.00016 | -0.00222 |
| 108 |    |   | 2S  | -0.01442 | -0.01091 | 0.02929  | 0.00071  | -0.00892 |
| 109 | 13 | C | 1S  | -0.00217 | -0.00168 | -0.00123 | -0.00003 | -0.00033 |
| 110 |    |   | 2S  | 0.00231  | 0.00177  | 0.00151  | 0.00004  | 0.00027  |
| 111 |    |   | 3S  | 0.03797  | 0.02924  | 0.02681  | 0.00065  | 0.00769  |
| 112 |    |   | 4PX | 0.01828  | 0.01408  | 0.00558  | 0.00014  | 0.04911  |
| 113 |    |   | 4PY | 0.00471  | 0.00360  | -0.00237 | -0.00006 | 0.05461  |
| 114 |    |   | 4PZ | -0.00233 | -0.00180 | -0.00116 | -0.00003 | 0.00834  |
| 115 |    |   | 5PX | 0.04450  | 0.03429  | 0.00525  | 0.00013  | 0.05692  |
| 116 |    |   | 5PY | -0.01868 | -0.01436 | -0.01370 | -0.00035 | 0.06277  |
| 117 |    |   | 5PZ | -0.01726 | -0.01354 | 0.01039  | 0.00030  | 0.01107  |
| 118 | 14 | H | 1S  | -0.00005 | -0.00004 | 0.00118  | 0.00003  | -0.00099 |
| 119 |    |   | 2S  | 0.01053  | 0.00832  | -0.00679 | -0.00019 | -0.00618 |
| 120 | 15 | C | 1S  | 0.00076  | 0.00058  | 0.00019  | 0.00001  | -0.00026 |
| 121 |    |   | 2S  | -0.00105 | -0.00085 | -0.00034 | -0.00001 | 0.00161  |
| 122 |    |   | 3S  | -0.01977 | -0.01444 | 0.00257  | 0.00003  | -0.00595 |
| 123 |    |   | 4PX | 0.00141  | 0.00108  | -0.00018 | 0.00000  | -0.14890 |
| 124 |    |   | 4PY | 0.00760  | 0.00587  | 0.00342  | 0.00008  | -0.17520 |
| 125 |    |   | 4PZ | -0.00439 | -0.00340 | -0.00515 | -0.00013 | -0.02656 |
| 126 |    |   | 5PX | 0.02412  | 0.01704  | -0.00209 | 0.00011  | -0.13866 |
| 127 |    |   | 5PY | -0.01881 | -0.01350 | 0.00890  | 0.00012  | -0.17778 |
| 128 |    |   | 5PZ | 0.04011  | 0.03191  | -0.00326 | -0.00016 | -0.02830 |
| 129 | 16 | C | 1S  | 0.00054  | 0.00041  | 0.00090  | 0.00002  | 0.00000  |
| 130 |    |   | 2S  | -0.00022 | -0.00022 | -0.00009 | 0.00000  | 0.00099  |
| 131 |    |   | 3S  | -0.01765 | -0.01312 | -0.02831 | -0.00076 | -0.01253 |
| 132 |    |   | 4PX | -0.00823 | -0.00635 | -0.00257 | -0.00006 | 0.05525  |
| 133 |    |   | 4PY | -0.00668 | -0.00517 | 0.00215  | 0.00006  | 0.06334  |
| 134 |    |   | 4PZ | -0.00081 | -0.00061 | 0.00184  | 0.00005  | 0.01037  |
| 135 |    |   | 5PX | -0.03931 | -0.02994 | -0.00707 | -0.00022 | 0.06375  |
| 136 |    |   | 5PY | 0.00769  | 0.00567  | -0.00352 | -0.00006 | 0.09162  |
| 137 |    |   | 5PZ | 0.02586  | 0.02023  | 0.01055  | 0.00023  | 0.01825  |

|     |    |   |     |          |          |          |          |          |
|-----|----|---|-----|----------|----------|----------|----------|----------|
| 138 | 17 | H | 1S  | -0.00050 | -0.00040 | -0.00091 | -0.00002 | -0.00116 |
| 139 |    |   | 2S  | -0.00237 | -0.00155 | 0.00302  | 0.00004  | -0.00491 |
| 140 | 18 | C | 1S  | -0.00152 | -0.00118 | -0.00179 | -0.00005 | -0.00016 |
| 141 |    |   | 2S  | 0.00198  | 0.00151  | 0.00382  | 0.00010  | -0.00029 |
| 142 |    |   | 3S  | 0.01386  | 0.01043  | 0.01890  | 0.00050  | 0.01457  |
| 143 |    |   | 4PX | -0.00519 | -0.00398 | 0.00029  | 0.00001  | 0.07936  |
| 144 |    |   | 4PY | -0.00908 | -0.00701 | -0.00180 | -0.00005 | 0.09305  |
| 145 |    |   | 4PZ | -0.00734 | -0.00566 | -0.01372 | -0.00035 | 0.00902  |
| 146 |    |   | 5PX | -0.03519 | -0.02731 | -0.01811 | -0.00044 | 0.03927  |
| 147 |    |   | 5PY | 0.04707  | 0.03635  | 0.02473  | 0.00062  | 0.07486  |
| 148 |    |   | 5PZ | 0.02694  | 0.02105  | -0.01378 | -0.00036 | 0.00273  |
| 149 | 19 | H | 1S  | 0.00210  | 0.00161  | 0.00547  | 0.00014  | -0.00039 |
| 150 |    |   | 2S  | 0.02672  | 0.02087  | -0.00946 | -0.00026 | -0.00698 |
| 151 | 20 | C | 1S  | -0.00015 | -0.00013 | -0.00016 | 0.00000  | 0.00136  |
| 152 |    |   | 2S  | 0.00053  | 0.00021  | 0.00040  | 0.00001  | -0.00167 |
| 153 |    |   | 3S  | 0.01115  | 0.00977  | -0.00213 | 0.00002  | -0.02450 |
| 154 |    |   | 4PX | -0.00077 | -0.00057 | 0.00015  | 0.00001  | 0.09740  |
| 155 |    |   | 4PY | -0.00115 | -0.00093 | -0.00047 | -0.00002 | 0.11000  |
| 156 |    |   | 4PZ | -0.00136 | -0.00105 | -0.00078 | -0.00002 | 0.03800  |
| 157 |    |   | 5PX | 0.01036  | 0.00658  | -0.00037 | 0.00013  | 0.05101  |
| 158 |    |   | 5PY | -0.00819 | -0.00511 | 0.00017  | -0.00008 | 0.04919  |
| 159 |    |   | 5PZ | -0.00816 | -0.00434 | 0.00230  | -0.00020 | 0.01784  |
| 160 | 21 | C | 1S  | -0.00014 | -0.00013 | 0.00005  | 0.00001  | 0.00034  |
| 161 |    |   | 2S  | -0.00021 | -0.00011 | -0.00007 | -0.00001 | -0.00246 |
| 162 |    |   | 3S  | 0.00458  | 0.00273  | -0.00001 | -0.00014 | 0.02569  |
| 163 |    |   | 4PX | 0.00066  | 0.00044  | -0.00028 | 0.00001  | -0.00400 |
| 164 |    |   | 4PY | -0.00003 | 0.00000  | 0.00042  | 0.00001  | -0.01345 |
| 165 |    |   | 4PZ | 0.00004  | -0.00005 | -0.00004 | 0.00001  | -0.00474 |
| 166 |    |   | 5PX | 0.00479  | 0.00115  | -0.00091 | 0.00008  | 0.04981  |
| 167 |    |   | 5PY | -0.00233 | -0.00168 | -0.00071 | 0.00010  | 0.04532  |
| 168 |    |   | 5PZ | -0.00067 | -0.00033 | -0.00070 | 0.00001  | 0.00163  |
| 169 | 22 | H | 1S  | -0.00038 | -0.00026 | 0.00003  | 0.00000  | 0.01341  |
| 170 |    |   | 2S  | 0.00109  | 0.00068  | -0.00058 | -0.00001 | 0.03911  |
| 171 | 23 | H | 1S  | 0.00031  | 0.00020  | 0.00011  | 0.00001  | -0.02281 |
| 172 |    |   | 2S  | 0.00035  | 0.00128  | 0.00088  | -0.00005 | -0.08757 |
| 173 | 24 | C | 1S  | 0.00004  | -0.00002 | 0.00001  | 0.00002  | -0.00331 |
| 174 |    |   | 2S  | -0.00014 | -0.00036 | 0.00000  | -0.00002 | 0.00443  |
| 175 |    |   | 3S  | -0.00053 | 0.00178  | -0.00003 | -0.00056 | 0.05807  |
| 176 |    |   | 4PX | -0.00031 | -0.00033 | 0.00002  | 0.00010  | 0.00910  |
| 177 |    |   | 4PY | -0.00008 | 0.00001  | -0.00007 | -0.00007 | -0.00376 |

|     |    |      |          |          |          |          |          |
|-----|----|------|----------|----------|----------|----------|----------|
| 178 |    | 4PZ  | 0.00038  | 0.00017  | 0.00000  | 0.00003  | -0.01059 |
| 179 |    | 5PX  | 0.00498  | 0.00151  | -0.00015 | 0.00040  | -0.03555 |
| 180 |    | 5PY  | -0.00276 | 0.00098  | 0.00094  | -0.00021 | -0.06482 |
| 181 |    | 5PZ  | -0.00072 | -0.00033 | 0.00066  | -0.00039 | -0.02643 |
| 182 | 25 | H 1S | 0.00005  | -0.00018 | 0.00003  | 0.00004  | 0.00201  |
| 183 |    | 2S   | -0.00113 | 0.00015  | -0.00027 | 0.00013  | 0.02092  |
| 184 | 26 | H 1S | 0.00005  | -0.00003 | 0.00005  | 0.00000  | -0.00138 |
| 185 |    | 2S   | 0.00009  | 0.00154  | 0.00046  | 0.00002  | -0.05612 |
| 186 | 27 | O 1S | -0.00008 | -0.00007 | -0.00002 | 0.00000  | -0.00013 |
| 187 |    | 2S   | 0.00035  | 0.00032  | 0.00005  | 0.00001  | -0.00018 |
| 188 |    | 3S   | -0.00157 | -0.00146 | 0.00017  | -0.00002 | 0.00367  |
| 189 |    | 4PX  | -0.00211 | -0.00158 | -0.00006 | 0.00001  | 0.07622  |
| 190 |    | 4PY  | 0.00023  | 0.00024  | -0.00071 | -0.00001 | -0.08506 |
| 191 |    | 4PZ  | -0.00013 | -0.00017 | 0.00067  | 0.00001  | 0.02851  |
| 192 |    | 5PX  | -0.00180 | -0.00137 | 0.00023  | 0.00000  | 0.06067  |
| 193 |    | 5PY  | -0.00013 | -0.00027 | -0.00042 | -0.00002 | -0.06554 |
| 194 |    | 5PZ  | -0.00134 | -0.00103 | -0.00008 | 0.00002  | 0.02337  |
| 195 | 28 | N 1S | -0.00157 | -0.00121 | 0.00049  | 0.00001  | -0.00260 |
| 196 |    | 2S   | 0.00344  | 0.00265  | -0.00086 | -0.00002 | 0.00632  |
| 197 |    | 3S   | 0.00917  | 0.00701  | -0.00274 | -0.00007 | 0.01793  |
| 198 |    | 4PX  | -0.00046 | -0.00037 | -0.00456 | -0.00012 | 0.11085  |
| 199 |    | 4PY  | -0.00916 | -0.00704 | 0.00845  | 0.00022  | -0.15077 |
| 200 |    | 4PZ  | 0.00559  | 0.00430  | -0.00052 | -0.00001 | 0.02401  |
| 201 |    | 5PX  | -0.00104 | -0.00078 | -0.00492 | -0.00013 | 0.10873  |
| 202 |    | 5PY  | 0.00475  | 0.00370  | 0.01051  | 0.00026  | -0.13640 |
| 203 |    | 5PZ  | 0.02422  | 0.01869  | -0.01491 | -0.00037 | 0.02081  |
| 204 | 29 | N 1S | -0.00032 | -0.00025 | 0.00008  | 0.00000  | -0.00007 |
| 205 |    | 2S   | -0.00016 | -0.00011 | -0.00030 | -0.00001 | -0.00045 |
| 206 |    | 3S   | 0.00990  | 0.00757  | 0.00023  | 0.00005  | 0.00257  |
| 207 |    | 4PX  | 0.00053  | 0.00036  | -0.00021 | -0.00001 | -0.02082 |
| 208 |    | 4PY  | -0.00422 | -0.00324 | 0.00130  | 0.00003  | 0.02531  |
| 209 |    | 4PZ  | 0.00035  | 0.00026  | 0.00029  | 0.00001  | -0.00575 |
| 210 |    | 5PX  | -0.00226 | -0.00098 | -0.00240 | -0.00001 | -0.03990 |
| 211 |    | 5PY  | -0.00188 | -0.00090 | 0.00038  | 0.00004  | 0.03530  |
| 212 |    | 5PZ  | 0.01943  | 0.01415  | 0.00311  | -0.00003 | -0.01692 |
| 213 | 30 | H 1S | -0.00133 | -0.00105 | 0.00060  | 0.00001  | 0.00261  |
| 214 |    | 2S   | -0.01107 | -0.00828 | 0.00242  | 0.00010  | 0.01479  |
| 215 | 31 | C 1S | 0.00444  | 0.00342  | -0.00267 | -0.00007 | 0.00076  |
| 216 |    | 2S   | -0.00637 | -0.00495 | 0.00484  | 0.00012  | -0.00268 |
| 217 |    | 3S   | -0.04529 | -0.03475 | 0.03186  | 0.00080  | 0.00031  |

|     |    |      |          |          |          |          |          |
|-----|----|------|----------|----------|----------|----------|----------|
| 218 |    | 4PX  | 0.01570  | 0.01209  | -0.01175 | -0.00030 | -0.09147 |
| 219 |    | 4PY  | 0.01387  | 0.01068  | -0.00796 | -0.00020 | 0.11285  |
| 220 |    | 4PZ  | 0.00740  | 0.00571  | -0.00998 | -0.00025 | -0.01765 |
| 221 |    | 5PX  | -0.05203 | -0.03982 | 0.00200  | 0.00008  | -0.07425 |
| 222 |    | 5PY  | -0.05639 | -0.04322 | -0.01303 | -0.00030 | 0.07910  |
| 223 |    | 5PZ  | 0.02346  | 0.01815  | -0.04004 | -0.00100 | -0.01551 |
| 224 | 32 | H 1S | -0.00806 | -0.00622 | 0.00647  | 0.00016  | -0.00222 |
| 225 |    | 2S   | -0.01443 | -0.01092 | -0.02930 | -0.00071 | -0.00890 |
| 226 | 33 | C 1S | -0.00217 | -0.00168 | 0.00123  | 0.00003  | -0.00034 |
| 227 |    | 2S   | 0.00231  | 0.00177  | -0.00151 | -0.00004 | 0.00029  |
| 228 |    | 3S   | 0.03798  | 0.02924  | -0.02681 | -0.00065 | 0.00768  |
| 229 |    | 4PX  | -0.01828 | -0.01408 | 0.00558  | 0.00014  | -0.04881 |
| 230 |    | 4PY  | 0.00471  | 0.00360  | 0.00237  | 0.00006  | 0.05421  |
| 231 |    | 4PZ  | 0.00233  | 0.00180  | -0.00116 | -0.00003 | -0.00826 |
| 232 |    | 5PX  | -0.04450 | -0.03429 | 0.00525  | 0.00013  | -0.05665 |
| 233 |    | 5PY  | -0.01868 | -0.01436 | 0.01370  | 0.00035  | 0.06228  |
| 234 |    | 5PZ  | 0.01727  | 0.01354  | 0.01040  | 0.00030  | -0.01098 |
| 235 | 34 | H 1S | -0.00005 | -0.00004 | -0.00118 | -0.00003 | -0.00099 |
| 236 |    | 2S   | 0.01053  | 0.00832  | 0.00680  | 0.00019  | -0.00614 |
| 237 | 35 | C 1S | 0.00076  | 0.00058  | -0.00019 | -0.00001 | -0.00026 |
| 238 |    | 2S   | -0.00105 | -0.00085 | 0.00034  | 0.00001  | 0.00160  |
| 239 |    | 3S   | -0.01978 | -0.01444 | -0.00258 | -0.00003 | -0.00588 |
| 240 |    | 4PX  | -0.00140 | -0.00108 | -0.00018 | 0.00000  | 0.14805  |
| 241 |    | 4PY  | 0.00760  | 0.00587  | -0.00342 | -0.00008 | -0.17421 |
| 242 |    | 4PZ  | 0.00440  | 0.00340  | -0.00515 | -0.00013 | 0.02642  |
| 243 |    | 5PX  | -0.02412 | -0.01704 | -0.00209 | 0.00011  | 0.13791  |
| 244 |    | 5PY  | -0.01882 | -0.01350 | -0.00890 | -0.00012 | -0.17679 |
| 245 |    | 5PZ  | -0.04011 | -0.03191 | -0.00325 | -0.00016 | 0.02800  |
| 246 | 36 | C 1S | 0.00054  | 0.00041  | -0.00090 | -0.00002 | 0.00000  |
| 247 |    | 2S   | -0.00022 | -0.00022 | 0.00009  | 0.00000  | 0.00100  |
| 248 |    | 3S   | -0.01765 | -0.01312 | 0.02830  | 0.00076  | -0.01250 |
| 249 |    | 4PX  | 0.00823  | 0.00636  | -0.00257 | -0.00006 | -0.05498 |
| 250 |    | 4PY  | -0.00668 | -0.00517 | -0.00215 | -0.00006 | 0.06302  |
| 251 |    | 4PZ  | 0.00081  | 0.00061  | 0.00184  | 0.00005  | -0.01031 |
| 252 |    | 5PX  | 0.03931  | 0.02994  | -0.00708 | -0.00022 | -0.06341 |
| 253 |    | 5PY  | 0.00770  | 0.00567  | 0.00351  | 0.00006  | 0.09123  |
| 254 |    | 5PZ  | -0.02586 | -0.02022 | 0.01056  | 0.00023  | -0.01823 |
| 255 | 37 | H 1S | -0.00050 | -0.00040 | 0.00091  | 0.00002  | -0.00116 |
| 256 |    | 2S   | -0.00238 | -0.00155 | -0.00302 | -0.00004 | -0.00490 |
| 257 | 38 | C 1S | -0.00152 | -0.00118 | 0.00180  | 0.00005  | -0.00016 |

|     |    |      |          |          |          |          |          |
|-----|----|------|----------|----------|----------|----------|----------|
| 258 |    | 2S   | 0.00198  | 0.00151  | -0.00382 | -0.00010 | -0.00028 |
| 259 |    | 3S   | 0.01386  | 0.01043  | -0.01891 | -0.00050 | 0.01452  |
| 260 |    | 4PX  | 0.00519  | 0.00398  | 0.00029  | 0.00001  | -0.07890 |
| 261 |    | 4PY  | -0.00908 | -0.00701 | 0.00181  | 0.00005  | 0.09249  |
| 262 |    | 4PZ  | 0.00734  | 0.00566  | -0.01372 | -0.00035 | -0.00892 |
| 263 |    | 5PX  | 0.03520  | 0.02731  | -0.01811 | -0.00044 | -0.03883 |
| 264 |    | 5PY  | 0.04707  | 0.03635  | -0.02473 | -0.00062 | 0.07448  |
| 265 |    | 5PZ  | -0.02694 | -0.02105 | -0.01379 | -0.00036 | -0.00273 |
| 266 | 39 | H 1S | 0.00211  | 0.00162  | -0.00547 | -0.00014 | -0.00038 |
| 267 |    | 2S   | 0.02672  | 0.02087  | 0.00947  | 0.00026  | -0.00693 |
| 268 | 40 | C 1S | -0.00015 | -0.00013 | 0.00016  | 0.00000  | 0.00135  |
| 269 |    | 2S   | 0.00053  | 0.00021  | -0.00040 | -0.00001 | -0.00165 |
| 270 |    | 3S   | 0.01115  | 0.00977  | 0.00213  | -0.00002 | -0.02436 |
| 271 |    | 4PX  | 0.00077  | 0.00057  | 0.00015  | 0.00001  | -0.09682 |
| 272 |    | 4PY  | -0.00114 | -0.00093 | 0.00047  | 0.00002  | 0.10936  |
| 273 |    | 4PZ  | 0.00136  | 0.00105  | -0.00078 | -0.00002 | -0.03777 |
| 274 |    | 5PX  | -0.01036 | -0.00658 | -0.00037 | 0.00013  | -0.05066 |
| 275 |    | 5PY  | -0.00819 | -0.00511 | -0.00017 | 0.00008  | 0.04892  |
| 276 |    | 5PZ  | 0.00815  | 0.00434  | 0.00230  | -0.00020 | -0.01779 |
| 277 | 41 | C 1S | -0.00014 | -0.00013 | -0.00005 | -0.00001 | 0.00034  |
| 278 |    | 2S   | -0.00021 | -0.00011 | 0.00007  | 0.00001  | -0.00245 |
| 279 |    | 3S   | 0.00458  | 0.00273  | 0.00002  | 0.00014  | 0.02554  |
| 280 |    | 4PX  | -0.00066 | -0.00044 | -0.00028 | 0.00001  | 0.00396  |
| 281 |    | 4PY  | -0.00003 | 0.00000  | -0.00042 | -0.00001 | -0.01337 |
| 282 |    | 4PZ  | -0.00004 | 0.00005  | -0.00004 | 0.00001  | 0.00470  |
| 283 |    | 5PX  | -0.00479 | -0.00115 | -0.00091 | 0.00008  | -0.04951 |
| 284 |    | 5PY  | -0.00233 | -0.00168 | 0.00071  | -0.00010 | 0.04510  |
| 285 |    | 5PZ  | 0.00067  | 0.00033  | -0.00070 | 0.00001  | -0.00165 |
| 286 | 42 | H 1S | -0.00038 | -0.00026 | -0.00003 | 0.00000  | 0.01333  |
| 287 |    | 2S   | 0.00109  | 0.00068  | 0.00058  | 0.00001  | 0.03892  |
| 288 | 43 | H 1S | 0.00031  | 0.00020  | -0.00011 | -0.00001 | -0.02268 |
| 289 |    | 2S   | 0.00035  | 0.00128  | -0.00088 | 0.00005  | -0.08708 |
| 290 | 44 | C 1S | 0.00004  | -0.00002 | -0.00001 | -0.00002 | -0.00330 |
| 291 |    | 2S   | -0.00014 | -0.00036 | 0.00000  | 0.00002  | 0.00440  |
| 292 |    | 3S   | -0.00053 | 0.00178  | 0.00003  | 0.00056  | 0.05780  |
| 293 |    | 4PX  | 0.00031  | 0.00033  | 0.00002  | 0.00010  | -0.00905 |
| 294 |    | 4PY  | -0.00008 | 0.00001  | 0.00007  | 0.00007  | -0.00376 |
| 295 |    | 4PZ  | -0.00038 | -0.00017 | 0.00000  | 0.00003  | 0.01052  |
| 296 |    | 5PX  | -0.00498 | -0.00151 | -0.00015 | 0.00040  | 0.03544  |
| 297 |    | 5PY  | -0.00276 | 0.00098  | -0.00094 | 0.00021  | -0.06449 |

|     |    |      |          |          |          |          |          |
|-----|----|------|----------|----------|----------|----------|----------|
| 298 |    | 5PZ  | 0.00072  | 0.00033  | 0.00066  | -0.00039 | 0.02621  |
| 299 | 45 | H 1S | 0.00005  | -0.00018 | -0.00003 | -0.00004 | 0.00200  |
| 300 |    | 2S   | -0.00113 | 0.00015  | 0.00027  | -0.00013 | 0.02080  |
| 301 | 46 | H 1S | 0.00005  | -0.00003 | -0.00005 | 0.00000  | -0.00137 |
| 302 |    | 2S   | 0.00009  | 0.00154  | -0.00046 | -0.00002 | -0.05585 |
| 303 | 47 | O 1S | 0.00006  | -0.00009 | 0.00000  | 0.00002  | -0.00013 |
| 304 |    | 2S   | -0.00026 | 0.00040  | -0.00001 | -0.00005 | -0.00018 |
| 305 |    | 3S   | 0.00114  | -0.00181 | 0.00003  | -0.00017 | 0.00370  |
| 306 |    | 4PX  | 0.00164  | -0.00207 | -0.00001 | 0.00006  | 0.07670  |
| 307 |    | 4PY  | 0.00016  | -0.00029 | 0.00003  | -0.00071 | 0.08558  |
| 308 |    | 4PZ  | -0.00008 | 0.00019  | -0.00002 | 0.00066  | -0.02868 |
| 309 |    | 5PX  | 0.00139  | -0.00178 | 0.00001  | -0.00023 | 0.06106  |
| 310 |    | 5PY  | -0.00006 | 0.00030  | 0.00000  | -0.00042 | 0.06594  |
| 311 |    | 5PZ  | -0.00103 | 0.00134  | 0.00002  | -0.00008 | -0.02350 |
| 312 | 48 | N 1S | 0.00121  | -0.00157 | 0.00001  | -0.00049 | -0.00260 |
| 313 |    | 2S   | -0.00265 | 0.00344  | -0.00002 | 0.00086  | 0.00632  |
| 314 |    | 3S   | -0.00708 | 0.00912  | -0.00007 | 0.00274  | 0.01793  |
| 315 |    | 4PX  | 0.00035  | -0.00047 | -0.00011 | 0.00456  | 0.11160  |
| 316 |    | 4PY  | -0.00706 | 0.00914  | -0.00021 | 0.00845  | 0.15169  |
| 317 |    | 4PZ  | 0.00431  | -0.00558 | 0.00001  | -0.00052 | -0.02413 |
| 318 |    | 5PX  | 0.00080  | -0.00102 | -0.00012 | 0.00491  | 0.10943  |
| 319 |    | 5PY  | 0.00365  | -0.00479 | -0.00027 | 0.01051  | 0.13723  |
| 320 |    | 5PZ  | 0.01865  | -0.02425 | 0.00038  | -0.01491 | -0.02089 |
| 321 | 49 | N 1S | 0.00024  | -0.00032 | 0.00000  | -0.00008 | -0.00007 |
| 322 |    | 2S   | 0.00013  | -0.00015 | 0.00000  | 0.00030  | -0.00045 |
| 323 |    | 3S   | -0.00764 | 0.00984  | -0.00004 | -0.00023 | 0.00259  |
| 324 |    | 4PX  | -0.00042 | 0.00049  | 0.00000  | 0.00021  | -0.02094 |
| 325 |    | 4PY  | -0.00326 | 0.00421  | -0.00003 | 0.00130  | -0.02547 |
| 326 |    | 4PZ  | 0.00028  | -0.00034 | 0.00000  | 0.00029  | 0.00579  |
| 327 |    | 5PX  | 0.00193  | -0.00152 | -0.00011 | 0.00240  | -0.04016 |
| 328 |    | 5PY  | -0.00158 | 0.00135  | 0.00002  | 0.00038  | -0.03550 |
| 329 |    | 5PZ  | 0.01517  | -0.01864 | -0.00019 | 0.00310  | 0.01702  |
| 330 | 50 | H 1S | 0.00102  | -0.00135 | 0.00002  | -0.00060 | 0.00263  |
| 331 |    | 2S   | 0.00859  | -0.01083 | 0.00002  | -0.00242 | 0.01489  |
| 332 | 51 | C 1S | -0.00342 | 0.00444  | -0.00007 | 0.00267  | 0.00076  |
| 333 |    | 2S   | 0.00490  | -0.00641 | 0.00013  | -0.00484 | -0.00269 |
| 334 |    | 3S   | 0.03492  | -0.04515 | 0.00082  | -0.03185 | 0.00035  |
| 335 |    | 4PX  | -0.01209 | 0.01570  | -0.00030 | 0.01175  | -0.09201 |
| 336 |    | 4PY  | 0.01069  | -0.01386 | 0.00020  | -0.00796 | -0.11350 |
| 337 |    | 4PZ  | 0.00570  | -0.00741 | 0.00025  | -0.00998 | 0.01773  |



|     |    |      |          |          |          |          |          |
|-----|----|------|----------|----------|----------|----------|----------|
| 338 |    | 5PX  | 0.04014  | -0.05178 | 0.00002  | -0.00200 | -0.07463 |
| 339 |    | 5PY  | -0.04349 | 0.05618  | 0.00036  | -0.01303 | -0.07958 |
| 340 |    | 5PZ  | 0.01806  | -0.02354 | 0.00103  | -0.04004 | 0.01563  |
| 341 | 52 | H 1S | 0.00621  | -0.00807 | 0.00017  | -0.00647 | -0.00222 |
| 342 |    | 2S   | 0.01117  | -0.01424 | -0.00078 | 0.02930  | -0.00893 |
| 343 | 53 | C 1S | 0.00167  | -0.00218 | 0.00003  | -0.00123 | -0.00034 |
| 344 |    | 2S   | -0.00178 | 0.00230  | -0.00004 | 0.00151  | 0.00028  |
| 345 |    | 3S   | -0.02926 | 0.03797  | -0.00072 | 0.02681  | 0.00770  |
| 346 |    | 4PX  | 0.01408  | -0.01827 | 0.00014  | -0.00558 | -0.04914 |
| 347 |    | 4PY  | 0.00363  | -0.00468 | -0.00006 | 0.00237  | -0.05461 |
| 348 |    | 4PZ  | 0.00179  | -0.00234 | 0.00003  | -0.00116 | 0.00833  |
| 349 |    | 5PX  | 0.03428  | -0.04451 | 0.00014  | -0.00525 | -0.05699 |
| 350 |    | 5PY  | -0.01440 | 0.01865  | -0.00035 | 0.01370  | -0.06276 |
| 351 |    | 5PZ  | 0.01325  | -0.01750 | -0.00023 | 0.01040  | 0.01106  |
| 352 | 54 | H 1S | 0.00003  | -0.00005 | -0.00003 | 0.00118  | -0.00099 |
| 353 |    | 2S   | -0.00806 | 0.01073  | 0.00015  | -0.00680 | -0.00617 |
| 354 | 55 | C 1S | -0.00058 | 0.00075  | 0.00000  | 0.00019  | -0.00026 |
| 355 |    | 2S   | 0.00080  | -0.00109 | 0.00001  | -0.00034 | 0.00161  |
| 356 |    | 3S   | 0.01544  | -0.01900 | -0.00010 | 0.00258  | -0.00595 |
| 357 |    | 4PX  | 0.00108  | -0.00141 | -0.00001 | 0.00018  | 0.14896  |
| 358 |    | 4PY  | 0.00585  | -0.00761 | 0.00009  | -0.00342 | 0.17529  |
| 359 |    | 4PZ  | 0.00338  | -0.00441 | 0.00013  | -0.00515 | -0.02658 |
| 360 |    | 5PX  | 0.01897  | -0.02263 | -0.00021 | 0.00209  | 0.13872  |
| 361 |    | 5PY  | -0.01475 | 0.01786  | 0.00034  | -0.00890 | 0.17788  |
| 362 |    | 5PZ  | -0.03064 | 0.04109  | 0.00001  | -0.00326 | -0.02826 |
| 363 | 56 | C 1S | -0.00042 | 0.00053  | -0.00002 | 0.00090  | 0.00000  |
| 364 |    | 2S   | 0.00016  | -0.00027 | 0.00001  | -0.00009 | 0.00100  |
| 365 |    | 3S   | 0.01372  | -0.01719 | 0.00068  | -0.02830 | -0.01254 |
| 366 |    | 4PX  | -0.00634 | 0.00825  | -0.00007 | 0.00257  | -0.05528 |
| 367 |    | 4PY  | -0.00514 | 0.00670  | 0.00005  | -0.00215 | -0.06337 |
| 368 |    | 4PZ  | 0.00062  | -0.00079 | -0.00005 | 0.00184  | 0.01037  |
| 369 |    | 5PX  | -0.03038 | 0.03898  | -0.00014 | 0.00708  | -0.06378 |
| 370 |    | 5PY  | 0.00600  | -0.00745 | -0.00012 | 0.00351  | -0.09170 |
| 371 |    | 5PZ  | -0.01985 | 0.02615  | -0.00031 | 0.01055  | 0.01829  |
| 372 | 57 | H 1S | 0.00038  | -0.00051 | 0.00003  | -0.00091 | -0.00116 |
| 373 |    | 2S   | 0.00190  | -0.00211 | -0.00011 | 0.00302  | -0.00492 |
| 374 | 58 | C 1S | 0.00117  | -0.00153 | 0.00005  | -0.00180 | -0.00016 |
| 375 |    | 2S   | -0.00153 | 0.00196  | -0.00010 | 0.00382  | -0.00029 |
| 376 |    | 3S   | -0.01074 | 0.01362  | -0.00047 | 0.01891  | 0.01459  |
| 377 |    | 4PX  | -0.00400 | 0.00517  | 0.00001  | -0.00029 | -0.07941 |

|     |    |      |          |          |          |          |          |
|-----|----|------|----------|----------|----------|----------|----------|
| 378 |    | 4PY  | -0.00699 | 0.00909  | -0.00005 | 0.00181  | -0.09310 |
| 379 |    | 4PZ  | 0.00565  | -0.00734 | 0.00035  | -0.01372 | 0.00901  |
| 380 |    | 5PX  | -0.02707 | 0.03539  | -0.00048 | 0.01811  | -0.03923 |
| 381 |    | 5PY  | 0.03624  | -0.04716 | 0.00064  | -0.02473 | -0.07493 |
| 382 |    | 5PZ  | -0.02068 | 0.02723  | 0.00034  | -0.01380 | 0.00272  |
| 383 | 59 | H 1S | -0.00162 | 0.00210  | -0.00014 | 0.00547  | -0.00038 |
| 384 |    | 2S   | -0.02052 | 0.02700  | 0.00022  | -0.00947 | -0.00699 |
| 385 | 60 | C 1S | 0.00012  | -0.00017 | 0.00001  | -0.00016 | 0.00136  |
| 386 |    | 2S   | -0.00046 | 0.00034  | -0.00001 | 0.00040  | -0.00167 |
| 387 |    | 3S   | -0.00829 | 0.01229  | 0.00013  | -0.00213 | -0.02453 |
| 388 |    | 4PX  | -0.00060 | 0.00074  | 0.00000  | -0.00015 | -0.09743 |
| 389 |    | 4PY  | -0.00087 | 0.00119  | -0.00001 | 0.00047  | -0.11003 |
| 390 |    | 4PZ  | 0.00105  | -0.00136 | 0.00002  | -0.00078 | 0.03801  |
| 391 |    | 5PX  | 0.00834  | -0.00901 | -0.00015 | 0.00037  | -0.05102 |
| 392 |    | 5PY  | -0.00661 | 0.00703  | 0.00009  | -0.00017 | -0.04920 |
| 393 |    | 5PZ  | 0.00678  | -0.00628 | -0.00031 | 0.00229  | 0.01785  |
| 394 | 61 | C 1S | 0.00010  | -0.00016 | 0.00000  | 0.00005  | 0.00034  |
| 395 |    | 2S   | 0.00017  | -0.00016 | 0.00000  | -0.00007 | -0.00246 |
| 396 |    | 3S   | -0.00373 | 0.00381  | -0.00014 | -0.00002 | 0.02571  |
| 397 |    | 4PX  | 0.00052  | -0.00060 | -0.00002 | 0.00028  | 0.00399  |
| 398 |    | 4PY  | -0.00002 | 0.00001  | 0.00001  | -0.00042 | 0.01346  |
| 399 |    | 4PZ  | -0.00005 | -0.00003 | 0.00001  | -0.00004 | -0.00474 |
| 400 |    | 5PX  | 0.00434  | -0.00233 | -0.00013 | 0.00090  | -0.04981 |
| 401 |    | 5PY  | -0.00182 | 0.00222  | -0.00013 | 0.00070  | -0.04533 |
| 402 |    | 5PZ  | 0.00056  | -0.00049 | 0.00005  | -0.00070 | 0.00163  |
| 403 | 62 | H 1S | 0.00030  | -0.00035 | 0.00000  | 0.00003  | 0.01342  |
| 404 |    | 2S   | -0.00088 | 0.00093  | 0.00002  | -0.00058 | 0.03910  |
| 405 | 63 | H 1S | -0.00025 | 0.00027  | 0.00000  | 0.00011  | -0.02282 |
| 406 |    | 2S   | -0.00001 | 0.00132  | -0.00010 | 0.00087  | -0.08759 |
| 407 | 64 | C 1S | -0.00004 | -0.00001 | 0.00002  | 0.00001  | -0.00332 |
| 408 |    | 2S   | 0.00004  | -0.00039 | -0.00002 | 0.00000  | 0.00443  |
| 409 |    | 3S   | 0.00097  | 0.00158  | -0.00056 | -0.00006 | 0.05807  |
| 410 |    | 4PX  | -0.00021 | 0.00040  | -0.00010 | -0.00002 | -0.00911 |
| 411 |    | 4PY  | -0.00008 | 0.00001  | 0.00006  | 0.00007  | 0.00376  |
| 412 |    | 4PZ  | -0.00032 | 0.00026  | 0.00003  | 0.00000  | -0.01059 |
| 413 |    | 5PX  | 0.00443  | -0.00273 | -0.00041 | 0.00013  | 0.03555  |
| 414 |    | 5PY  | -0.00292 | -0.00024 | 0.00026  | -0.00093 | 0.06482  |
| 415 |    | 5PZ  | 0.00061  | -0.00050 | -0.00042 | 0.00064  | -0.02644 |
| 416 | 65 | H 1S | -0.00010 | -0.00016 | 0.00003  | 0.00003  | 0.00200  |
| 417 |    | 2S   | 0.00113  | -0.00014 | 0.00015  | -0.00026 | 0.02093  |

|     |    |   |     |          |          |          |          |          |
|-----|----|---|-----|----------|----------|----------|----------|----------|
| 418 | 66 | H | 1S  | -0.00006 | -0.00002 | 0.00000  | 0.00005  | -0.00138 |
| 419 |    |   | 2S  | 0.00031  | 0.00151  | 0.00000  | 0.00046  | -0.05612 |
| 420 | 67 | O | 1S  | 0.00006  | -0.00009 | 0.00000  | -0.00002 | -0.00013 |
| 421 |    |   | 2S  | -0.00026 | 0.00040  | 0.00001  | 0.00005  | -0.00018 |
| 422 |    |   | 3S  | 0.00114  | -0.00181 | -0.00003 | 0.00017  | 0.00370  |
| 423 |    |   | 4PX | -0.00164 | 0.00207  | -0.00001 | 0.00006  | -0.07656 |
| 424 |    |   | 4PY | 0.00016  | -0.00029 | -0.00003 | 0.00071  | 0.08542  |
| 425 |    |   | 4PZ | 0.00008  | -0.00019 | -0.00002 | 0.00066  | 0.02863  |
| 426 |    |   | 5PX | -0.00139 | 0.00178  | 0.00001  | -0.00023 | -0.06095 |
| 427 |    |   | 5PY | -0.00006 | 0.00030  | 0.00000  | 0.00042  | 0.06581  |
| 428 |    |   | 5PZ | 0.00103  | -0.00134 | 0.00002  | -0.00008 | 0.02346  |
| 429 | 68 | N | 1S  | 0.00121  | -0.00157 | -0.00001 | 0.00049  | -0.00260 |
| 430 |    |   | 2S  | -0.00265 | 0.00344  | 0.00002  | -0.00086 | 0.00633  |
| 431 |    |   | 3S  | -0.00708 | 0.00912  | 0.00007  | -0.00274 | 0.01795  |
| 432 |    |   | 4PX | -0.00035 | 0.00047  | -0.00011 | 0.00456  | -0.11137 |
| 433 |    |   | 4PY | -0.00706 | 0.00914  | 0.00021  | -0.00845 | 0.15143  |
| 434 |    |   | 4PZ | -0.00431 | 0.00558  | 0.00001  | -0.00052 | 0.02410  |
| 435 |    |   | 5PX | -0.00081 | 0.00102  | -0.00012 | 0.00492  | -0.10923 |
| 436 |    |   | 5PY | 0.00365  | -0.00479 | 0.00027  | -0.01051 | 0.13700  |
| 437 |    |   | 5PZ | -0.01865 | 0.02425  | 0.00038  | -0.01491 | 0.02088  |
| 438 | 69 | N | 1S  | 0.00024  | -0.00032 | 0.00000  | 0.00008  | -0.00007 |
| 439 |    |   | 2S  | 0.00013  | -0.00015 | 0.00000  | -0.00030 | -0.00045 |
| 440 |    |   | 3S  | -0.00764 | 0.00984  | 0.00004  | 0.00023  | 0.00258  |
| 441 |    |   | 4PX | 0.00042  | -0.00049 | 0.00000  | 0.00021  | 0.02091  |
| 442 |    |   | 4PY | -0.00326 | 0.00420  | 0.00003  | -0.00130 | -0.02543 |
| 443 |    |   | 4PZ | -0.00028 | 0.00035  | 0.00000  | 0.00029  | -0.00579 |
| 444 |    |   | 5PX | -0.00193 | 0.00152  | -0.00011 | 0.00240  | 0.04010  |
| 445 |    |   | 5PY | -0.00158 | 0.00135  | -0.00002 | -0.00038 | -0.03545 |
| 446 |    |   | 5PZ | -0.01517 | 0.01864  | -0.00019 | 0.00310  | -0.01697 |
| 447 | 70 | H | 1S  | 0.00102  | -0.00135 | -0.00002 | 0.00060  | 0.00262  |
| 448 |    |   | 2S  | 0.00859  | -0.01083 | -0.00002 | 0.00242  | 0.01484  |
| 449 | 71 | C | 1S  | -0.00342 | 0.00444  | 0.00007  | -0.00267 | 0.00076  |
| 450 |    |   | 2S  | 0.00490  | -0.00641 | -0.00013 | 0.00484  | -0.00269 |
| 451 |    |   | 3S  | 0.03492  | -0.04514 | -0.00082 | 0.03185  | 0.00032  |
| 452 |    |   | 4PX | 0.01209  | -0.01570 | -0.00030 | 0.01175  | 0.09187  |
| 453 |    |   | 4PY | 0.01069  | -0.01386 | -0.00020 | 0.00796  | -0.11334 |
| 454 |    |   | 4PZ | -0.00570 | 0.00741  | 0.00025  | -0.00998 | -0.01772 |
| 455 |    |   | 5PX | -0.04014 | 0.05177  | 0.00002  | -0.00200 | 0.07455  |
| 456 |    |   | 5PY | -0.04349 | 0.05618  | -0.00036 | 0.01303  | -0.07945 |
| 457 |    |   | 5PZ | -0.01806 | 0.02354  | 0.00103  | -0.04004 | -0.01559 |

|     |    |   |     |          |          |          |          |          |
|-----|----|---|-----|----------|----------|----------|----------|----------|
| 458 | 72 | H | 1S  | 0.00621  | -0.00807 | -0.00017 | 0.00647  | -0.00222 |
| 459 |    |   | 2S  | 0.01117  | -0.01424 | 0.00078  | -0.02930 | -0.00893 |
| 460 | 73 | C | 1S  | 0.00167  | -0.00218 | -0.00003 | 0.00123  | -0.00034 |
| 461 |    |   | 2S  | -0.00178 | 0.00230  | 0.00004  | -0.00151 | 0.00029  |
| 462 |    |   | 3S  | -0.02926 | 0.03796  | 0.00072  | -0.02681 | 0.00770  |
| 463 |    |   | 4PX | -0.01408 | 0.01827  | 0.00014  | -0.00558 | 0.04903  |
| 464 |    |   | 4PY | 0.00363  | -0.00468 | 0.00006  | -0.00237 | -0.05447 |
| 465 |    |   | 4PZ | -0.00179 | 0.00234  | 0.00003  | -0.00116 | -0.00831 |
| 466 |    |   | 5PX | -0.03427 | 0.04451  | 0.00014  | -0.00525 | 0.05689  |
| 467 |    |   | 5PY | -0.01440 | 0.01865  | 0.00035  | -0.01370 | -0.06259 |
| 468 |    |   | 5PZ | -0.01324 | 0.01750  | -0.00023 | 0.01040  | -0.01104 |
| 469 | 74 | H | 1S  | 0.00003  | -0.00005 | 0.00003  | -0.00118 | -0.00099 |
| 470 |    |   | 2S  | -0.00806 | 0.01073  | -0.00015 | 0.00680  | -0.00616 |
| 471 | 75 | C | 1S  | -0.00058 | 0.00075  | 0.00000  | -0.00019 | -0.00026 |
| 472 |    |   | 2S  | 0.00080  | -0.00109 | -0.00001 | 0.00034  | 0.00161  |
| 473 |    |   | 3S  | 0.01544  | -0.01900 | 0.00010  | -0.00258 | -0.00593 |
| 474 |    |   | 4PX | -0.00108 | 0.00141  | -0.00001 | 0.00018  | -0.14871 |
| 475 |    |   | 4PY | 0.00585  | -0.00761 | -0.00009 | 0.00342  | 0.17499  |
| 476 |    |   | 4PZ | -0.00338 | 0.00441  | 0.00013  | -0.00515 | 0.02654  |
| 477 |    |   | 5PX | -0.01897 | 0.02263  | -0.00021 | 0.00209  | -0.13846 |
| 478 |    |   | 5PY | -0.01475 | 0.01786  | -0.00034 | 0.00889  | 0.17760  |
| 479 |    |   | 5PZ | 0.03064  | -0.04109 | 0.00001  | -0.00326 | 0.02820  |
| 480 | 76 | C | 1S  | -0.00042 | 0.00053  | 0.00002  | -0.00090 | 0.00000  |
| 481 |    |   | 2S  | 0.00016  | -0.00027 | -0.00001 | 0.00009  | 0.00100  |
| 482 |    |   | 3S  | 0.01372  | -0.01719 | -0.00068 | 0.02830  | -0.01255 |
| 483 |    |   | 4PX | 0.00634  | -0.00825 | -0.00007 | 0.00257  | 0.05521  |
| 484 |    |   | 4PY | -0.00514 | 0.00670  | -0.00005 | 0.00215  | -0.06329 |
| 485 |    |   | 4PZ | -0.00062 | 0.00079  | -0.00005 | 0.00184  | -0.01036 |
| 486 |    |   | 5PX | 0.03037  | -0.03898 | -0.00014 | 0.00708  | 0.06368  |
| 487 |    |   | 5PY | 0.00600  | -0.00745 | 0.00012  | -0.00351 | -0.09161 |
| 488 |    |   | 5PZ | 0.01984  | -0.02615 | -0.00031 | 0.01055  | -0.01827 |
| 489 | 77 | H | 1S  | 0.00038  | -0.00051 | -0.00003 | 0.00091  | -0.00116 |
| 490 |    |   | 2S  | 0.00190  | -0.00211 | 0.00011  | -0.00302 | -0.00493 |
| 491 | 78 | C | 1S  | 0.00117  | -0.00153 | -0.00005 | 0.00180  | -0.00016 |
| 492 |    |   | 2S  | -0.00153 | 0.00196  | 0.00010  | -0.00382 | -0.00029 |
| 493 |    |   | 3S  | -0.01074 | 0.01362  | 0.00047  | -0.01891 | 0.01458  |
| 494 |    |   | 4PX | 0.00400  | -0.00517 | 0.00001  | -0.00029 | 0.07925  |
| 495 |    |   | 4PY | -0.00699 | 0.00909  | 0.00005  | -0.00181 | -0.09291 |
| 496 |    |   | 4PZ | -0.00565 | 0.00734  | 0.00035  | -0.01372 | -0.00898 |
| 497 |    |   | 5PX | 0.02706  | -0.03539 | -0.00048 | 0.01811  | 0.03908  |

|     |    |      |          |          |          |          |          |
|-----|----|------|----------|----------|----------|----------|----------|
| 498 |    | 5PY  | 0.03624  | -0.04716 | -0.00064 | 0.02473  | -0.07479 |
| 499 |    | 5PZ  | 0.02068  | -0.02722 | 0.00034  | -0.01380 | -0.00273 |
| 500 | 79 | H 1S | -0.00162 | 0.00210  | 0.00014  | -0.00547 | -0.00038 |
| 501 |    | 2S   | -0.02052 | 0.02700  | -0.00022 | 0.00947  | -0.00697 |
| 502 | 80 | C 1S | 0.00012  | -0.00017 | -0.00001 | 0.00016  | 0.00136  |
| 503 |    | 2S   | -0.00046 | 0.00034  | 0.00001  | -0.00040 | -0.00166 |
| 504 |    | 3S   | -0.00829 | 0.01229  | -0.00013 | 0.00213  | -0.02451 |
| 505 |    | 4PX  | 0.00060  | -0.00074 | 0.00000  | -0.00015 | 0.09725  |
| 506 |    | 4PY  | -0.00087 | 0.00119  | 0.00001  | -0.00047 | -0.10982 |
| 507 |    | 4PZ  | -0.00105 | 0.00136  | 0.00002  | -0.00078 | -0.03794 |
| 508 |    | 5PX  | -0.00834 | 0.00901  | -0.00015 | 0.00037  | 0.05096  |
| 509 |    | 5PY  | -0.00661 | 0.00703  | -0.00009 | 0.00017  | -0.04908 |
| 510 |    | 5PZ  | -0.00678 | 0.00628  | -0.00031 | 0.00229  | -0.01778 |
| 511 | 81 | C 1S | 0.00010  | -0.00016 | 0.00000  | -0.00005 | 0.00034  |
| 512 |    | 2S   | 0.00017  | -0.00016 | 0.00000  | 0.00007  | -0.00245 |
| 513 |    | 3S   | -0.00373 | 0.00381  | 0.00014  | 0.00002  | 0.02567  |
| 514 |    | 4PX  | -0.00052 | 0.00060  | -0.00002 | 0.00028  | -0.00400 |
| 515 |    | 4PY  | -0.00002 | 0.00001  | -0.00001 | 0.00042  | 0.01344  |
| 516 |    | 4PZ  | 0.00005  | 0.00003  | 0.00001  | -0.00004 | 0.00474  |
| 517 |    | 5PX  | -0.00434 | 0.00233  | -0.00013 | 0.00090  | 0.04974  |
| 518 |    | 5PY  | -0.00182 | 0.00222  | 0.00013  | -0.00070 | -0.04521 |
| 519 |    | 5PZ  | -0.00056 | 0.00049  | 0.00005  | -0.00070 | -0.00160 |
| 520 | 82 | H 1S | 0.00030  | -0.00035 | 0.00000  | -0.00003 | 0.01340  |
| 521 |    | 2S   | -0.00088 | 0.00093  | -0.00002 | 0.00058  | 0.03898  |
| 522 | 83 | H 1S | -0.00025 | 0.00027  | 0.00000  | -0.00011 | -0.02278 |
| 523 |    | 2S   | -0.00001 | 0.00132  | 0.00010  | -0.00087 | -0.08741 |
| 524 | 84 | C 1S | -0.00004 | -0.00001 | -0.00002 | -0.00001 | -0.00331 |
| 525 |    | 2S   | 0.00004  | -0.00039 | 0.00002  | 0.00000  | 0.00442  |
| 526 |    | 3S   | 0.00097  | 0.00158  | 0.00056  | 0.00006  | 0.05788  |
| 527 |    | 4PX  | 0.00021  | -0.00040 | -0.00010 | -0.00002 | 0.00909  |
| 528 |    | 4PY  | -0.00008 | 0.00001  | -0.00006 | -0.00007 | 0.00373  |
| 529 |    | 4PZ  | 0.00032  | -0.00026 | 0.00003  | 0.00000  | 0.01058  |
| 530 |    | 5PX  | -0.00443 | 0.00273  | -0.00041 | 0.00013  | -0.03540 |
| 531 |    | 5PY  | -0.00292 | -0.00024 | -0.00026 | 0.00093  | 0.06465  |
| 532 |    | 5PZ  | -0.00061 | 0.00050  | -0.00042 | 0.00064  | 0.02646  |
| 533 | 85 | H 1S | -0.00010 | -0.00016 | -0.00003 | -0.00003 | 0.00200  |
| 534 |    | 2S   | 0.00113  | -0.00014 | -0.00015 | 0.00026  | 0.02090  |
| 535 | 86 | H 1S | -0.00006 | -0.00002 | 0.00000  | -0.00005 | -0.00139 |
| 536 |    | 2S   | 0.00031  | 0.00151  | 0.00000  | -0.00046 | -0.05595 |

HOMO (#184) and LUMO(#185) for 2:

|                |       | 181      | 182      | 183      | 184      | 185      |
|----------------|-------|----------|----------|----------|----------|----------|
|                |       | O        | O        | O        | O        | V        |
| EIGENVALUES -- |       | -0.22669 | -0.22669 | -0.21836 | -0.21836 | -0.08730 |
| 1 1            | Zn 1S | 0.00049  | -0.00295 | 0.00000  | 0.00000  | 0.00170  |
| 2              | 2S    | 0.00240  | -0.01397 | 0.00000  | 0.00000  | 0.00450  |
| 3              | 3PX   | 0.00000  | 0.00001  | -0.00013 | 0.01155  | -0.00003 |
| 4              | 3PY   | 0.00047  | -0.00321 | 0.00000  | 0.00000  | 0.02932  |
| 5              | 3PZ   | 0.00000  | 0.00000  | 0.00048  | -0.04466 | 0.00000  |
| 6              | 4PX   | 0.00000  | 0.00001  | 0.00045  | -0.04261 | -0.00001 |
| 7              | 4PY   | -0.00104 | 0.00602  | 0.00000  | 0.00000  | -0.00368 |
| 8              | 4PZ   | 0.00000  | 0.00000  | -0.00099 | 0.09090  | 0.00000  |
| 9              | 5D 0  | 0.00631  | -0.03948 | 0.00000  | 0.00000  | 0.00564  |
| 10             | 5D+1  | 0.00740  | -0.04626 | 0.00000  | 0.00000  | -0.01304 |
| 11             | 5D-1  | 0.00000  | 0.00000  | -0.00072 | 0.06708  | 0.00002  |
| 12             | 5D+2  | -0.00424 | 0.02657  | 0.00000  | 0.00000  | -0.03260 |
| 13             | 5D-2  | 0.00000  | -0.00001 | 0.00035  | -0.03208 | 0.00000  |
| 14             | 6D 0  | 0.00092  | -0.00574 | 0.00000  | 0.00000  | 0.00082  |
| 15             | 6D+1  | 0.00113  | -0.00703 | 0.00000  | 0.00000  | -0.00208 |
| 16             | 6D-1  | 0.00000  | 0.00000  | -0.00009 | 0.00851  | 0.00000  |
| 17             | 6D+2  | -0.00053 | 0.00331  | 0.00000  | 0.00000  | -0.00461 |
| 18             | 6D-2  | 0.00000  | 0.00000  | 0.00004  | -0.00348 | 0.00000  |
| 19 2           | Zn 1S | -0.00295 | -0.00045 | 0.00000  | 0.00000  | 0.00169  |
| 20             | 2S    | -0.01402 | -0.00208 | 0.00000  | 0.00000  | 0.00449  |
| 21             | 3PX   | 0.00001  | 0.00000  | -0.01155 | -0.00012 | 0.00011  |
| 22             | 3PY   | 0.00320  | 0.00056  | -0.00001 | 0.00000  | -0.02915 |
| 23             | 3PZ   | -0.00001 | 0.00000  | -0.04466 | -0.00048 | 0.00000  |
| 24             | 4PX   | 0.00001  | 0.00000  | 0.04261  | 0.00047  | 0.00001  |
| 25             | 4PY   | -0.00604 | -0.00089 | -0.00001 | 0.00000  | 0.00367  |
| 26             | 4PZ   | -0.00001 | 0.00000  | 0.09091  | 0.00096  | 0.00000  |
| 27             | 5D 0  | -0.03948 | -0.00631 | 0.00000  | 0.00000  | 0.00561  |
| 28             | 5D+1  | 0.04626  | 0.00739  | 0.00000  | 0.00000  | 0.01297  |
| 29             | 5D-1  | 0.00000  | 0.00000  | -0.06708 | -0.00072 | -0.00006 |
| 30             | 5D+2  | 0.02657  | 0.00425  | 0.00000  | 0.00000  | -0.03241 |
| 31             | 5D-2  | 0.00001  | 0.00000  | -0.03208 | -0.00034 | 0.00001  |
| 32             | 6D 0  | -0.00574 | -0.00092 | 0.00000  | 0.00000  | 0.00082  |
| 33             | 6D+1  | 0.00703  | 0.00112  | 0.00000  | 0.00000  | 0.00207  |
| 34             | 6D-1  | 0.00000  | 0.00000  | -0.00851 | -0.00009 | -0.00001 |
| 35             | 6D+2  | 0.00331  | 0.00053  | 0.00000  | 0.00000  | -0.00459 |
| 36             | 6D-2  | 0.00000  | 0.00000  | -0.00348 | -0.00004 | 0.00000  |

|    |   |       |          |          |          |          |          |
|----|---|-------|----------|----------|----------|----------|----------|
| 37 | 3 | Br 1S | -0.00032 | -0.00005 | -0.00600 | -0.00006 | -0.00141 |
| 38 |   | 2S    | 0.00005  | 0.00001  | -0.02908 | -0.00031 | -0.00711 |
| 39 |   | 3PX   | -0.33012 | -0.05278 | 0.15033  | 0.00162  | 0.00130  |
| 40 |   | 3PY   | -0.02659 | -0.00424 | 0.21898  | 0.00236  | -0.00359 |
| 41 |   | 3PZ   | 0.15962  | 0.02552  | 0.27597  | 0.00297  | 0.01443  |
| 42 |   | 4PX   | -0.34809 | -0.05566 | 0.14710  | 0.00158  | 0.00509  |
| 43 |   | 4PY   | -0.02822 | -0.00451 | 0.23496  | 0.00253  | -0.00424 |
| 44 |   | 4PZ   | 0.16452  | 0.02632  | 0.27211  | 0.00293  | 0.01817  |
| 45 | 4 | Br 1S | -0.00032 | -0.00005 | 0.00600  | 0.00006  | -0.00140 |
| 46 |   | 2S    | 0.00005  | 0.00001  | 0.02908  | 0.00031  | -0.00706 |
| 47 |   | 3PX   | 0.33020  | 0.05279  | 0.15034  | 0.00162  | -0.00132 |
| 48 |   | 3PY   | -0.02659 | -0.00424 | -0.21902 | -0.00236 | -0.00355 |
| 49 |   | 3PZ   | -0.15967 | -0.02553 | 0.27598  | 0.00297  | -0.01435 |
| 50 |   | 4PX   | 0.34817  | 0.05567  | 0.14710  | 0.00158  | -0.00512 |
| 51 |   | 4PY   | -0.02821 | -0.00451 | -0.23501 | -0.00253 | -0.00418 |
| 52 |   | 4PZ   | -0.16456 | -0.02632 | 0.27212  | 0.00293  | -0.01807 |
| 53 | 5 | Br 1S | 0.00005  | -0.00032 | 0.00006  | -0.00600 | -0.00142 |
| 54 |   | 2S    | -0.00001 | 0.00005  | 0.00031  | -0.02908 | -0.00713 |
| 55 |   | 3PX   | -0.05279 | 0.33018  | 0.00162  | -0.15034 | -0.00132 |
| 56 |   | 3PY   | -0.00426 | 0.02659  | 0.00236  | -0.21902 | 0.00360  |
| 57 |   | 3PZ   | -0.02553 | 0.15966  | -0.00297 | 0.27597  | 0.01448  |
| 58 |   | 4PX   | -0.05566 | 0.34816  | 0.00158  | -0.14710 | -0.00513 |
| 59 |   | 4PY   | -0.00451 | 0.02821  | 0.00253  | -0.23500 | 0.00424  |
| 60 |   | 4PZ   | -0.02630 | 0.16456  | -0.00293 | 0.27212  | 0.01824  |
| 61 | 6 | Br 1S | 0.00005  | -0.00032 | -0.00006 | 0.00600  | -0.00141 |
| 62 |   | 2S    | -0.00001 | 0.00005  | -0.00031 | 0.02908  | -0.00712 |
| 63 |   | 3PX   | 0.05278  | -0.33013 | 0.00162  | -0.15033 | 0.00132  |
| 64 |   | 3PY   | -0.00426 | 0.02659  | -0.00236 | 0.21899  | 0.00358  |
| 65 |   | 3PZ   | 0.02552  | -0.15963 | -0.00297 | 0.27596  | -0.01446 |
| 66 |   | 4PX   | 0.05565  | -0.34811 | 0.00158  | -0.14710 | 0.00514  |
| 67 |   | 4PY   | -0.00451 | 0.02821  | -0.00253 | 0.23498  | 0.00422  |
| 68 |   | 4PZ   | 0.02629  | -0.16453 | -0.00293 | 0.27211  | -0.01821 |
| 69 | 7 | O 1S  | -0.00007 | -0.00002 | 0.00004  | 0.00000  | -0.00017 |
| 70 |   | 2S    | 0.00036  | 0.00009  | -0.00006 | -0.00001 | -0.00010 |
| 71 |   | 3S    | -0.00181 | -0.00047 | -0.00042 | 0.00002  | 0.00424  |
| 72 |   | 4PX   | 0.00224  | 0.00034  | -0.00041 | 0.00000  | -0.07751 |
| 73 |   | 4PY   | 0.00064  | 0.00015  | 0.00045  | -0.00001 | -0.08209 |
| 74 |   | 4PZ   | 0.00038  | 0.00011  | 0.00057  | 0.00000  | -0.02818 |
| 75 |   | 5PX   | 0.00201  | 0.00031  | 0.00012  | -0.00001 | -0.06223 |
| 76 |   | 5PY   | 0.00000  | -0.00011 | 0.00014  | 0.00001  | -0.06322 |

|     |    |      |          |          |          |          |          |
|-----|----|------|----------|----------|----------|----------|----------|
| 77  |    | 5PZ  | 0.00177  | 0.00028  | -0.00013 | 0.00002  | -0.02350 |
| 78  | 8  | N 1S | -0.00208 | -0.00033 | -0.00053 | -0.00001 | -0.00284 |
| 79  |    | 2S   | 0.00446  | 0.00071  | 0.00092  | 0.00001  | 0.00684  |
| 80  |    | 3S   | 0.01349  | 0.00212  | 0.00309  | 0.00003  | 0.01945  |
| 81  |    | 4PX  | 0.00073  | 0.00013  | -0.00542 | -0.00006 | -0.11013 |
| 82  |    | 4PY  | -0.01110 | -0.00176 | -0.00905 | -0.00010 | -0.15006 |
| 83  |    | 4PZ  | -0.00710 | -0.00113 | -0.00097 | -0.00001 | -0.03072 |
| 84  |    | 5PX  | 0.00071  | 0.00011  | -0.00167 | -0.00003 | -0.10588 |
| 85  |    | 5PY  | 0.00433  | 0.00072  | -0.01245 | -0.00013 | -0.13817 |
| 86  |    | 5PZ  | -0.02094 | -0.00336 | -0.00654 | -0.00007 | -0.02844 |
| 87  | 9  | N 1S | -0.00054 | -0.00009 | -0.00009 | 0.00000  | 0.00008  |
| 88  |    | 2S   | 0.00024  | 0.00005  | 0.00036  | 0.00001  | -0.00102 |
| 89  |    | 3S   | 0.01189  | 0.00188  | -0.00027 | -0.00005 | 0.00409  |
| 90  |    | 4PX  | -0.00064 | -0.00008 | 0.00018  | 0.00000  | 0.02195  |
| 91  |    | 4PY  | -0.00518 | -0.00082 | -0.00065 | -0.00001 | 0.02436  |
| 92  |    | 4PZ  | -0.00083 | -0.00013 | 0.00035  | 0.00001  | 0.00933  |
| 93  |    | 5PX  | 0.00252  | -0.00009 | -0.00212 | 0.00004  | 0.04109  |
| 94  |    | 5PY  | -0.00149 | 0.00010  | 0.00088  | -0.00002 | 0.03367  |
| 95  |    | 5PZ  | -0.02158 | -0.00289 | 0.00223  | -0.00010 | 0.02084  |
| 96  | 10 | H 1S | -0.00187 | -0.00031 | -0.00067 | 0.00000  | 0.00347  |
| 97  |    | 2S   | -0.01161 | -0.00167 | -0.00288 | -0.00007 | 0.01572  |
| 98  | 11 | C 1S | -0.00183 | -0.00029 | -0.00180 | -0.00002 | -0.00026 |
| 99  |    | 2S   | 0.00323  | 0.00050  | 0.00407  | 0.00005  | -0.00006 |
| 100 |    | 3S   | 0.01493  | 0.00222  | 0.02276  | 0.00026  | 0.01653  |
| 101 |    | 4PX  | -0.00613 | -0.00097 | 0.00099  | 0.00001  | 0.07652  |
| 102 |    | 4PY  | -0.01033 | -0.00166 | -0.00083 | -0.00001 | 0.09142  |
| 103 |    | 4PZ  | -0.00985 | -0.00158 | -0.01417 | -0.00015 | 0.01318  |
| 104 |    | 5PX  | -0.03282 | -0.00538 | -0.01411 | -0.00014 | 0.03680  |
| 105 |    | 5PY  | 0.04429  | 0.00713  | 0.01894  | 0.00019  | 0.07369  |
| 106 |    | 5PZ  | 0.02652  | 0.00444  | -0.00989 | -0.00012 | 0.00842  |
| 107 | 12 | H 1S | 0.00310  | 0.00049  | 0.00521  | 0.00006  | -0.00033 |
| 108 |    | 2S   | 0.02666  | 0.00445  | -0.00727 | -0.00010 | -0.00594 |
| 109 | 13 | C 1S | 0.00059  | 0.00009  | 0.00083  | 0.00001  | -0.00011 |
| 110 |    | 2S   | -0.00097 | -0.00019 | -0.00042 | 0.00000  | 0.00140  |
| 111 |    | 3S   | -0.01054 | -0.00137 | -0.02350 | -0.00030 | -0.01319 |
| 112 |    | 4PX  | -0.01084 | -0.00174 | -0.00278 | -0.00003 | 0.05381  |
| 113 |    | 4PY  | -0.00962 | -0.00155 | 0.00183  | 0.00002  | 0.06346  |
| 114 |    | 4PZ  | -0.00171 | -0.00026 | 0.00164  | 0.00002  | 0.01366  |
| 115 |    | 5PX  | -0.04315 | -0.00666 | -0.00595 | -0.00010 | 0.06171  |
| 116 |    | 5PY  | 0.00680  | 0.00089  | -0.00213 | 0.00001  | 0.09248  |



|     |    |      |          |          |          |          |          |
|-----|----|------|----------|----------|----------|----------|----------|
| 117 |    | 5PZ  | 0.02541  | 0.00427  | 0.00863  | 0.00005  | 0.02073  |
| 118 | 14 | H 1S | -0.00068 | -0.00012 | -0.00102 | -0.00001 | -0.00147 |
| 119 |    | 2S   | -0.00409 | -0.00046 | 0.00259  | -0.00001 | -0.00652 |
| 120 | 15 | C 1S | 0.00110  | 0.00017  | 0.00019  | 0.00000  | -0.00016 |
| 121 |    | 2S   | -0.00211 | -0.00036 | -0.00051 | -0.00001 | 0.00165  |
| 122 |    | 3S   | -0.02182 | -0.00299 | 0.00380  | 0.00000  | -0.00842 |
| 123 |    | 4PX  | 0.00238  | 0.00038  | -0.00058 | 0.00000  | -0.14900 |
| 124 |    | 4PY  | 0.01052  | 0.00169  | 0.00286  | 0.00003  | -0.17252 |
| 125 |    | 4PZ  | -0.00551 | -0.00089 | -0.00523 | -0.00006 | -0.03342 |
| 126 |    | 5PX  | 0.02757  | 0.00335  | -0.00280 | 0.00015  | -0.13779 |
| 127 |    | 5PY  | -0.02278 | -0.00297 | 0.00671  | -0.00005 | -0.17615 |
| 128 |    | 5PZ  | 0.04500  | 0.00786  | -0.00104 | -0.00010 | -0.03628 |
| 129 | 16 | C 1S | -0.00283 | -0.00046 | -0.00114 | -0.00001 | -0.00029 |
| 130 |    | 2S   | 0.00438  | 0.00069  | 0.00186  | 0.00002  | 0.00037  |
| 131 |    | 3S   | 0.03628  | 0.00582  | 0.02065  | 0.00019  | 0.00534  |
| 132 |    | 4PX  | 0.02302  | 0.00368  | 0.00462  | 0.00005  | 0.04743  |
| 133 |    | 4PY  | 0.00574  | 0.00090  | -0.00261 | -0.00003 | 0.05229  |
| 134 |    | 4PZ  | -0.00214 | -0.00035 | -0.00117 | -0.00001 | 0.01115  |
| 135 |    | 5PX  | 0.04805  | 0.00770  | 0.00501  | 0.00005  | 0.05500  |
| 136 |    | 5PY  | -0.01781 | -0.00282 | -0.01313 | -0.00015 | 0.06118  |
| 137 |    | 5PZ  | -0.02100 | -0.00353 | 0.00844  | 0.00013  | 0.01286  |
| 138 | 17 | H 1S | 0.00084  | 0.00013  | 0.00149  | 0.00002  | -0.00126 |
| 139 |    | 2S   | 0.01342  | 0.00229  | -0.00557 | -0.00008 | -0.00516 |
| 140 | 18 | C 1S | 0.00623  | 0.00099  | 0.00273  | 0.00003  | 0.00065  |
| 141 |    | 2S   | -0.01026 | -0.00167 | -0.00550 | -0.00006 | -0.00224 |
| 142 |    | 3S   | -0.05959 | -0.00944 | -0.03304 | -0.00035 | 0.00178  |
| 143 |    | 4PX  | -0.02344 | -0.00375 | -0.01147 | -0.00012 | 0.09186  |
| 144 |    | 4PY  | 0.01739  | 0.00278  | 0.00892  | 0.00010  | 0.11563  |
| 145 |    | 4PZ  | -0.01231 | -0.00197 | -0.01043 | -0.00011 | 0.02379  |
| 146 |    | 5PX  | 0.05171  | 0.00809  | 0.00125  | 0.00005  | 0.07362  |
| 147 |    | 5PY  | -0.05726 | -0.00901 | 0.01415  | 0.00012  | 0.08182  |
| 148 |    | 5PZ  | -0.01914 | -0.00311 | -0.03089 | -0.00032 | 0.01990  |
| 149 | 19 | H 1S | -0.01080 | -0.00174 | -0.00573 | -0.00006 | -0.00234 |
| 150 |    | 2S   | -0.01505 | -0.00227 | 0.02231  | 0.00021  | -0.00846 |
| 151 | 20 | C 1S | -0.00021 | -0.00004 | -0.00016 | 0.00000  | 0.00181  |
| 152 |    | 2S   | 0.00055  | -0.00004 | 0.00046  | 0.00001  | -0.00185 |
| 153 |    | 3S   | 0.01406  | 0.00302  | -0.00139 | 0.00005  | -0.03434 |
| 154 |    | 4PX  | -0.00111 | -0.00016 | 0.00032  | 0.00001  | 0.09826  |
| 155 |    | 4PY  | -0.00168 | -0.00030 | -0.00031 | -0.00001 | 0.10463  |
| 156 |    | 4PZ  | -0.00167 | -0.00027 | -0.00074 | -0.00001 | 0.03781  |

|     |    |      |          |          |          |          |          |
|-----|----|------|----------|----------|----------|----------|----------|
| 157 |    | 5PX  | 0.00999  | 0.00068  | -0.00032 | 0.00016  | 0.05259  |
| 158 |    | 5PY  | -0.00796 | -0.00049 | 0.00015  | -0.00009 | 0.04559  |
| 159 |    | 5PZ  | -0.00887 | -0.00003 | 0.00243  | -0.00025 | 0.01829  |
| 160 | 21 | C 1S | -0.00015 | -0.00004 | 0.00005  | 0.00001  | 0.00010  |
| 161 |    | 2S   | -0.00015 | 0.00000  | -0.00006 | -0.00001 | -0.00193 |
| 162 |    | 3S   | 0.00373  | 0.00019  | -0.00022 | -0.00009 | 0.02904  |
| 163 |    | 4PX  | 0.00064  | 0.00005  | -0.00035 | 0.00001  | -0.00283 |
| 164 |    | 4PY  | 0.00018  | 0.00003  | 0.00040  | 0.00000  | -0.01347 |
| 165 |    | 4PZ  | -0.00006 | -0.00006 | -0.00008 | 0.00002  | -0.00500 |
| 166 |    | 5PX  | 0.00335  | -0.00121 | -0.00115 | 0.00010  | 0.05396  |
| 167 |    | 5PY  | -0.00230 | -0.00032 | -0.00056 | 0.00010  | 0.04060  |
| 168 |    | 5PZ  | -0.00043 | -0.00009 | -0.00075 | 0.00000  | 0.00211  |
| 169 | 22 | H 1S | -0.00038 | -0.00003 | 0.00008  | 0.00000  | 0.01279  |
| 170 |    | 2S   | 0.00120  | -0.00012 | -0.00058 | -0.00003 | 0.03813  |
| 171 | 23 | H 1S | 0.00048  | 0.00004  | 0.00005  | 0.00001  | -0.02276 |
| 172 |    | 2S   | 0.00109  | 0.00087  | 0.00087  | -0.00008 | -0.08806 |
| 173 | 24 | C 1S | 0.00004  | -0.00003 | 0.00001  | 0.00002  | -0.00358 |
| 174 |    | 2S   | -0.00031 | -0.00023 | 0.00001  | -0.00002 | 0.00488  |
| 175 |    | 3S   | 0.00016  | 0.00157  | -0.00003 | -0.00053 | 0.06039  |
| 176 |    | 4PX  | -0.00046 | -0.00014 | 0.00005  | 0.00010  | 0.00994  |
| 177 |    | 4PY  | -0.00008 | 0.00005  | -0.00004 | -0.00007 | -0.00418 |
| 178 |    | 4PZ  | 0.00046  | -0.00002 | -0.00002 | 0.00004  | -0.01136 |
| 179 |    | 5PX  | 0.00463  | -0.00070 | -0.00012 | 0.00047  | -0.03611 |
| 180 |    | 5PY  | -0.00179 | 0.00207  | 0.00090  | -0.00023 | -0.06288 |
| 181 |    | 5PZ  | -0.00046 | 0.00017  | 0.00067  | -0.00034 | -0.02896 |
| 182 | 25 | H 1S | -0.00002 | -0.00016 | 0.00004  | 0.00004  | 0.00199  |
| 183 |    | 2S   | -0.00095 | 0.00044  | -0.00026 | 0.00008  | 0.02160  |
| 184 | 26 | H 1S | 0.00005  | -0.00004 | 0.00003  | 0.00000  | -0.00131 |
| 185 |    | 2S   | 0.00076  | 0.00132  | 0.00040  | 0.00002  | -0.05672 |
| 186 | 27 | O 1S | -0.00007 | -0.00002 | -0.00004 | 0.00000  | -0.00017 |
| 187 |    | 2S   | 0.00036  | 0.00009  | 0.00006  | 0.00001  | -0.00010 |
| 188 |    | 3S   | -0.00181 | -0.00047 | 0.00042  | -0.00002 | 0.00427  |
| 189 |    | 4PX  | -0.00224 | -0.00034 | -0.00041 | 0.00000  | 0.07804  |
| 190 |    | 4PY  | 0.00064  | 0.00015  | -0.00045 | 0.00001  | -0.08263 |
| 191 |    | 4PZ  | -0.00038 | -0.00011 | 0.00057  | 0.00000  | 0.02836  |
| 192 |    | 5PX  | -0.00201 | -0.00031 | 0.00012  | -0.00001 | 0.06266  |
| 193 |    | 5PY  | 0.00000  | -0.00011 | -0.00014 | -0.00001 | -0.06363 |
| 194 |    | 5PZ  | -0.00178 | -0.00028 | -0.00013 | 0.00002  | 0.02365  |
| 195 | 28 | N 1S | -0.00208 | -0.00033 | 0.00052  | 0.00001  | -0.00283 |
| 196 |    | 2S   | 0.00445  | 0.00071  | -0.00091 | -0.00001 | 0.00681  |

|     |    |      |          |          |          |          |          |
|-----|----|------|----------|----------|----------|----------|----------|
| 197 |    | 3S   | 0.01347  | 0.00212  | -0.00308 | -0.00003 | 0.01936  |
| 198 |    | 4PX  | -0.00072 | -0.00012 | -0.00542 | -0.00006 | 0.11093  |
| 199 |    | 4PY  | -0.01109 | -0.00176 | 0.00905  | 0.00010  | -0.15099 |
| 200 |    | 4PZ  | 0.00709  | 0.00113  | -0.00096 | -0.00001 | 0.03086  |
| 201 |    | 5PX  | -0.00070 | -0.00011 | -0.00168 | -0.00003 | 0.10662  |
| 202 |    | 5PY  | 0.00434  | 0.00072  | 0.01245  | 0.00013  | -0.13900 |
| 203 |    | 5PZ  | 0.02093  | 0.00336  | -0.00654 | -0.00007 | 0.02853  |
| 204 | 29 | N 1S | -0.00054 | -0.00009 | 0.00009  | 0.00000  | 0.00008  |
| 205 |    | 2S   | 0.00024  | 0.00005  | -0.00036 | -0.00001 | -0.00103 |
| 206 |    | 3S   | 0.01189  | 0.00188  | 0.00027  | 0.00005  | 0.00411  |
| 207 |    | 4PX  | 0.00064  | 0.00008  | 0.00018  | 0.00000  | -0.02209 |
| 208 |    | 4PY  | -0.00518 | -0.00082 | 0.00066  | 0.00001  | 0.02450  |
| 209 |    | 4PZ  | 0.00082  | 0.00013  | 0.00035  | 0.00001  | -0.00937 |
| 210 |    | 5PX  | -0.00253 | 0.00009  | -0.00212 | 0.00004  | -0.04140 |
| 211 |    | 5PY  | -0.00149 | 0.00010  | -0.00088 | 0.00002  | 0.03384  |
| 212 |    | 5PZ  | 0.02158  | 0.00289  | 0.00224  | -0.00010 | -0.02094 |
| 213 | 30 | H 1S | -0.00187 | -0.00031 | 0.00067  | 0.00000  | 0.00350  |
| 214 |    | 2S   | -0.01161 | -0.00167 | 0.00288  | 0.00007  | 0.01585  |
| 215 | 31 | C 1S | -0.00183 | -0.00029 | 0.00180  | 0.00002  | -0.00026 |
| 216 |    | 2S   | 0.00323  | 0.00050  | -0.00407 | -0.00005 | -0.00007 |
| 217 |    | 3S   | 0.01493  | 0.00222  | -0.02276 | -0.00026 | 0.01656  |
| 218 |    | 4PX  | 0.00612  | 0.00097  | 0.00099  | 0.00001  | -0.07707 |
| 219 |    | 4PY  | -0.01033 | -0.00166 | 0.00083  | 0.00001  | 0.09208  |
| 220 |    | 4PZ  | 0.00985  | 0.00158  | -0.01416 | -0.00015 | -0.01332 |
| 221 |    | 5PX  | 0.03282  | 0.00538  | -0.01411 | -0.00014 | -0.03733 |
| 222 |    | 5PY  | 0.04430  | 0.00713  | -0.01894 | -0.00019 | 0.07416  |
| 223 |    | 5PZ  | -0.02650 | -0.00443 | -0.00989 | -0.00012 | -0.00841 |
| 224 | 32 | H 1S | 0.00311  | 0.00049  | -0.00521 | -0.00006 | -0.00034 |
| 225 |    | 2S   | 0.02666  | 0.00445  | 0.00727  | 0.00010  | -0.00602 |
| 226 | 33 | C 1S | 0.00059  | 0.00009  | -0.00083 | -0.00001 | -0.00011 |
| 227 |    | 2S   | -0.00097 | -0.00019 | 0.00042  | 0.00000  | 0.00140  |
| 228 |    | 3S   | -0.01055 | -0.00137 | 0.02350  | 0.00030  | -0.01316 |
| 229 |    | 4PX  | 0.01084  | 0.00174  | -0.00278 | -0.00003 | -0.05408 |
| 230 |    | 4PY  | -0.00961 | -0.00155 | -0.00184 | -0.00002 | 0.06377  |
| 231 |    | 4PZ  | 0.00170  | 0.00026  | 0.00164  | 0.00002  | -0.01374 |
| 232 |    | 5PX  | 0.04316  | 0.00666  | -0.00595 | -0.00010 | -0.06206 |
| 233 |    | 5PY  | 0.00680  | 0.00089  | 0.00213  | -0.00001 | 0.09288  |
| 234 |    | 5PZ  | -0.02543 | -0.00427 | 0.00864  | 0.00005  | -0.02080 |
| 235 | 34 | H 1S | -0.00068 | -0.00012 | 0.00102  | 0.00001  | -0.00147 |
| 236 |    | 2S   | -0.00408 | -0.00046 | -0.00259 | 0.00001  | -0.00653 |

|     |    |   |     |          |          |          |          |          |
|-----|----|---|-----|----------|----------|----------|----------|----------|
| 237 | 35 | C | 1S  | 0.00110  | 0.00017  | -0.00019 | 0.00000  | -0.00016 |
| 238 |    |   | 2S  | -0.00211 | -0.00036 | 0.00051  | 0.00001  | 0.00165  |
| 239 |    |   | 3S  | -0.02184 | -0.00299 | -0.00380 | 0.00000  | -0.00861 |
| 240 |    |   | 4PX | -0.00238 | -0.00038 | -0.00058 | 0.00000  | 0.14994  |
| 241 |    |   | 4PY | 0.01052  | 0.00169  | -0.00286 | -0.00003 | -0.17362 |
| 242 |    |   | 4PZ | 0.00551  | 0.00089  | -0.00523 | -0.00006 | 0.03362  |
| 243 |    |   | 5PX | -0.02757 | -0.00335 | -0.00280 | 0.00015  | 0.13860  |
| 244 |    |   | 5PY | -0.02278 | -0.00297 | -0.00671 | 0.00005  | -0.17727 |
| 245 |    |   | 5PZ | -0.04500 | -0.00786 | -0.00104 | -0.00010 | 0.03663  |
| 246 | 36 | C | 1S  | -0.00283 | -0.00046 | 0.00114  | 0.00001  | -0.00029 |
| 247 |    |   | 2S  | 0.00438  | 0.00069  | -0.00186 | -0.00002 | 0.00037  |
| 248 |    |   | 3S  | 0.03630  | 0.00582  | -0.02065 | -0.00019 | 0.00535  |
| 249 |    |   | 4PX | -0.02302 | -0.00368 | 0.00462  | 0.00005  | -0.04778 |
| 250 |    |   | 4PY | 0.00574  | 0.00090  | 0.00261  | 0.00003  | 0.05273  |
| 251 |    |   | 4PZ | 0.00214  | 0.00035  | -0.00117 | -0.00001 | -0.01125 |
| 252 |    |   | 5PX | -0.04805 | -0.00770 | 0.00501  | 0.00005  | -0.05533 |
| 253 |    |   | 5PY | -0.01781 | -0.00282 | 0.01313  | 0.00015  | 0.06173  |
| 254 |    |   | 5PZ | 0.02100  | 0.00353  | 0.00844  | 0.00013  | -0.01295 |
| 255 | 37 | H | 1S  | 0.00084  | 0.00013  | -0.00149 | -0.00002 | -0.00126 |
| 256 |    |   | 2S  | 0.01343  | 0.00229  | 0.00557  | 0.00008  | -0.00517 |
| 257 | 38 | C | 1S  | 0.00623  | 0.00099  | -0.00273 | -0.00003 | 0.00064  |
| 258 |    |   | 2S  | -0.01026 | -0.00167 | 0.00550  | 0.00006  | -0.00222 |
| 259 |    |   | 3S  | -0.05963 | -0.00945 | 0.03305  | 0.00035  | 0.00182  |
| 260 |    |   | 4PX | 0.02344  | 0.00375  | -0.01147 | -0.00012 | -0.09239 |
| 261 |    |   | 4PY | 0.01741  | 0.00278  | -0.00892 | -0.00010 | 0.11626  |
| 262 |    |   | 4PZ | 0.01232  | 0.00198  | -0.01043 | -0.00011 | -0.02388 |
| 263 |    |   | 5PX | -0.05171 | -0.00809 | 0.00126  | 0.00005  | -0.07394 |
| 264 |    |   | 5PY | -0.05726 | -0.00901 | -0.01415 | -0.00012 | 0.08225  |
| 265 |    |   | 5PZ | 0.01916  | 0.00311  | -0.03089 | -0.00032 | -0.02006 |
| 266 | 39 | H | 1S  | -0.01080 | -0.00174 | 0.00573  | 0.00006  | -0.00234 |
| 267 |    |   | 2S  | -0.01503 | -0.00226 | -0.02231 | -0.00021 | -0.00848 |
| 268 | 40 | C | 1S  | -0.00021 | -0.00004 | 0.00016  | 0.00000  | 0.00182  |
| 269 |    |   | 2S  | 0.00055  | -0.00004 | -0.00046 | -0.00001 | -0.00186 |
| 270 |    |   | 3S  | 0.01406  | 0.00302  | 0.00140  | -0.00005 | -0.03451 |
| 271 |    |   | 4PX | 0.00111  | 0.00016  | 0.00032  | 0.00001  | -0.09892 |
| 272 |    |   | 4PY | -0.00168 | -0.00030 | 0.00031  | 0.00001  | 0.10532  |
| 273 |    |   | 4PZ | 0.00167  | 0.00027  | -0.00074 | -0.00001 | -0.03806 |
| 274 |    |   | 5PX | -0.00999 | -0.00068 | -0.00032 | 0.00016  | -0.05299 |
| 275 |    |   | 5PY | -0.00796 | -0.00049 | -0.00015 | 0.00009  | 0.04588  |
| 276 |    |   | 5PZ | 0.00887  | 0.00003  | 0.00243  | -0.00025 | -0.01834 |

|     |    |   |     |          |          |          |          |          |
|-----|----|---|-----|----------|----------|----------|----------|----------|
| 277 | 41 | C | 1S  | -0.00015 | -0.00004 | -0.00005 | -0.00001 | 0.00010  |
| 278 |    |   | 2S  | -0.00015 | 0.00000  | 0.00006  | 0.00001  | -0.00194 |
| 279 |    |   | 3S  | 0.00373  | 0.00018  | 0.00022  | 0.00009  | 0.02921  |
| 280 |    |   | 4PX | -0.00064 | -0.00005 | -0.00035 | 0.00001  | 0.00287  |
| 281 |    |   | 4PY | 0.00018  | 0.00003  | -0.00040 | 0.00000  | -0.01355 |
| 282 |    |   | 4PZ | 0.00006  | 0.00006  | -0.00008 | 0.00002  | 0.00504  |
| 283 |    |   | 5PX | -0.00336 | 0.00121  | -0.00115 | 0.00010  | -0.05430 |
| 284 |    |   | 5PY | -0.00230 | -0.00032 | 0.00056  | -0.00010 | 0.04083  |
| 285 |    |   | 5PZ | 0.00043  | 0.00009  | -0.00075 | 0.00000  | -0.00208 |
| 286 | 42 | H | 1S  | -0.00038 | -0.00003 | -0.00008 | 0.00000  | 0.01288  |
| 287 |    |   | 2S  | 0.00120  | -0.00012 | 0.00058  | 0.00003  | 0.03833  |
| 288 | 43 | H | 1S  | 0.00048  | 0.00004  | -0.00005 | -0.00001 | -0.02292 |
| 289 |    |   | 2S  | 0.00109  | 0.00087  | -0.00087 | 0.00008  | -0.08861 |
| 290 | 44 | C | 1S  | 0.00004  | -0.00003 | -0.00001 | -0.00002 | -0.00360 |
| 291 |    |   | 2S  | -0.00031 | -0.00023 | -0.00001 | 0.00002  | 0.00491  |
| 292 |    |   | 3S  | 0.00016  | 0.00157  | 0.00003  | 0.00053  | 0.06070  |
| 293 |    |   | 4PX | 0.00046  | 0.00014  | 0.00005  | 0.00010  | -0.01000 |
| 294 |    |   | 4PY | -0.00008 | 0.00005  | 0.00004  | 0.00007  | -0.00419 |
| 295 |    |   | 4PZ | -0.00046 | 0.00002  | -0.00002 | 0.00004  | 0.01144  |
| 296 |    |   | 5PX | -0.00463 | 0.00070  | -0.00012 | 0.00047  | 0.03622  |
| 297 |    |   | 5PY | -0.00179 | 0.00207  | -0.00090 | 0.00023  | -0.06324 |
| 298 |    |   | 5PZ | 0.00046  | -0.00017 | 0.00067  | -0.00034 | 0.02922  |
| 299 | 45 | H | 1S  | -0.00002 | -0.00016 | -0.00004 | -0.00004 | 0.00199  |
| 300 |    |   | 2S  | -0.00095 | 0.00044  | 0.00026  | -0.00008 | 0.02173  |
| 301 | 46 | H | 1S  | 0.00005  | -0.00004 | -0.00003 | 0.00000  | -0.00132 |
| 302 |    |   | 2S  | 0.00076  | 0.00132  | -0.00040 | -0.00002 | -0.05702 |
| 303 | 47 | O | 1S  | 0.00001  | -0.00008 | 0.00000  | 0.00004  | -0.00017 |
| 304 |    |   | 2S  | -0.00003 | 0.00037  | -0.00001 | -0.00006 | -0.00010 |
| 305 |    |   | 3S  | 0.00011  | -0.00186 | 0.00003  | -0.00042 | 0.00430  |
| 306 |    |   | 4PX | 0.00038  | -0.00224 | -0.00001 | 0.00041  | 0.07814  |
| 307 |    |   | 4PY | 0.00006  | -0.00065 | 0.00002  | -0.00045 | 0.08272  |
| 308 |    |   | 4PZ | -0.00002 | 0.00040  | -0.00002 | 0.00057  | -0.02839 |
| 309 |    |   | 5PX | 0.00033  | -0.00201 | 0.00001  | -0.00012 | 0.06275  |
| 310 |    |   | 5PY | 0.00010  | 0.00004  | -0.00001 | -0.00014 | 0.06369  |
| 311 |    |   | 5PZ | -0.00029 | 0.00177  | 0.00002  | -0.00013 | -0.02366 |
| 312 | 48 | N | 1S  | 0.00033  | -0.00208 | 0.00001  | -0.00052 | -0.00285 |
| 313 |    |   | 2S  | -0.00071 | 0.00445  | -0.00001 | 0.00091  | 0.00687  |
| 314 |    |   | 3S  | -0.00219 | 0.01347  | -0.00003 | 0.00308  | 0.01952  |
| 315 |    |   | 4PX | 0.00011  | -0.00072 | -0.00006 | 0.00542  | 0.11103  |
| 316 |    |   | 4PY | -0.00179 | 0.01109  | -0.00009 | 0.00905  | 0.15124  |

|     |    |      |          |          |          |          |          |
|-----|----|------|----------|----------|----------|----------|----------|
| 317 |    | 4PZ  | 0.00114  | -0.00709 | 0.00001  | -0.00096 | -0.03094 |
| 318 |    | 5PX  | 0.00012  | -0.00070 | -0.00001 | 0.00168  | 0.10673  |
| 319 |    | 5PY  | 0.00067  | -0.00434 | -0.00014 | 0.01245  | 0.13924  |
| 320 |    | 5PZ  | 0.00333  | -0.02094 | 0.00007  | -0.00654 | -0.02863 |
| 321 | 49 | N 1S | 0.00008  | -0.00054 | 0.00000  | -0.00009 | 0.00008  |
| 322 |    | 2S   | -0.00003 | 0.00025  | 0.00000  | 0.00036  | -0.00102 |
| 323 |    | 3S   | -0.00192 | 0.01188  | -0.00004 | -0.00027 | 0.00411  |
| 324 |    | 4PX  | -0.00013 | 0.00063  | 0.00001  | -0.00018 | -0.02214 |
| 325 |    | 4PY  | -0.00084 | 0.00517  | -0.00001 | 0.00066  | -0.02456 |
| 326 |    | 4PZ  | 0.00014  | -0.00082 | 0.00000  | 0.00035  | 0.00940  |
| 327 |    | 5PX  | 0.00088  | -0.00237 | -0.00008 | 0.00212  | -0.04149 |
| 328 |    | 5PY  | -0.00056 | 0.00139  | 0.00004  | -0.00088 | -0.03392 |
| 329 |    | 5PZ  | 0.00398  | -0.02141 | -0.00014 | 0.00223  | 0.02093  |
| 330 | 50 | H 1S | 0.00028  | -0.00188 | 0.00001  | -0.00067 | 0.00350  |
| 331 |    | 2S   | 0.00203  | -0.01155 | -0.00001 | -0.00288 | 0.01582  |
| 332 | 51 | C 1S | 0.00029  | -0.00183 | 0.00002  | -0.00180 | -0.00026 |
| 333 |    | 2S   | -0.00053 | 0.00322  | -0.00004 | 0.00407  | -0.00006 |
| 334 |    | 3S   | -0.00255 | 0.01488  | -0.00023 | 0.02277  | 0.01665  |
| 335 |    | 4PX  | -0.00099 | 0.00612  | 0.00001  | -0.00099 | -0.07717 |
| 336 |    | 4PY  | -0.00164 | 0.01033  | -0.00001 | 0.00083  | -0.09219 |
| 337 |    | 4PZ  | 0.00157  | -0.00985 | 0.00015  | -0.01417 | 0.01331  |
| 338 |    | 5PX  | -0.00512 | 0.03287  | -0.00017 | 0.01411  | -0.03722 |
| 339 |    | 5PY  | 0.00703  | -0.04431 | 0.00021  | -0.01894 | -0.07428 |
| 340 |    | 5PZ  | -0.00405 | 0.02657  | 0.00009  | -0.00989 | 0.00845  |
| 341 | 52 | H 1S | -0.00050 | 0.00310  | -0.00005 | 0.00521  | -0.00033 |
| 342 |    | 2S   | -0.00408 | 0.02672  | 0.00006  | -0.00727 | -0.00601 |
| 343 | 53 | C 1S | -0.00010 | 0.00058  | -0.00001 | 0.00083  | -0.00011 |
| 344 |    | 2S   | 0.00012  | -0.00098 | 0.00001  | -0.00042 | 0.00141  |
| 345 |    | 3S   | 0.00199  | -0.01045 | 0.00021  | -0.02351 | -0.01327 |
| 346 |    | 4PX  | -0.00172 | 0.01084  | -0.00003 | 0.00278  | -0.05420 |
| 347 |    | 4PY  | -0.00152 | 0.00961  | 0.00002  | -0.00184 | -0.06391 |
| 348 |    | 4PZ  | 0.00028  | -0.00170 | -0.00002 | 0.00164  | 0.01376  |
| 349 |    | 5PX  | -0.00713 | 0.04308  | -0.00002 | 0.00595  | -0.06215 |
| 350 |    | 5PY  | 0.00127  | -0.00674 | -0.00006 | 0.00213  | -0.09314 |
| 351 |    | 5PZ  | -0.00387 | 0.02549  | -0.00014 | 0.00864  | 0.02085  |
| 352 | 54 | H 1S | 0.00010  | -0.00069 | 0.00001  | -0.00102 | -0.00148 |
| 353 |    | 2S   | 0.00084  | -0.00402 | -0.00006 | 0.00259  | -0.00657 |
| 354 | 55 | C 1S | -0.00018 | 0.00110  | 0.00000  | 0.00019  | -0.00016 |
| 355 |    | 2S   | 0.00031  | -0.00211 | 0.00001  | -0.00051 | 0.00165  |
| 356 |    | 3S   | 0.00397  | -0.02168 | -0.00008 | 0.00380  | -0.00858 |

|        |   |     |          |          |          |          |          |
|--------|---|-----|----------|----------|----------|----------|----------|
| 357    |   | 4PX | 0.00038  | -0.00238 | -0.00001 | 0.00058  | 0.15016  |
| 358    |   | 4PY | 0.00167  | -0.01053 | 0.00003  | -0.00286 | 0.17388  |
| 359    |   | 4PZ | 0.00087  | -0.00551 | 0.00006  | -0.00523 | -0.03368 |
| 360    |   | 5PX | 0.00541  | -0.02724 | -0.00021 | 0.00280  | 0.13876  |
| 361    |   | 5PY | -0.00428 | 0.02256  | 0.00020  | -0.00671 | 0.17760  |
| 362    |   | 5PZ | -0.00656 | 0.04521  | -0.00008 | -0.00104 | -0.03665 |
| 363 56 | C | 1S  | 0.00045  | -0.00283 | 0.00001  | -0.00114 | -0.00029 |
| 364    |   | 2S  | -0.00071 | 0.00438  | -0.00002 | 0.00186  | 0.00038  |
| 365    |   | 3S  | -0.00579 | 0.03631  | -0.00026 | 0.02064  | 0.00537  |
| 366    |   | 4PX | 0.00368  | -0.02302 | 0.00005  | -0.00462 | -0.04782 |
| 367    |   | 4PY | 0.00093  | -0.00573 | -0.00003 | 0.00261  | -0.05273 |
| 368    |   | 4PZ | 0.00034  | -0.00214 | 0.00001  | -0.00117 | 0.01125  |
| 369    |   | 5PX | 0.00767  | -0.04805 | 0.00006  | -0.00501 | -0.05543 |
| 370    |   | 5PY | -0.00288 | 0.01781  | -0.00014 | 0.01314  | -0.06171 |
| 371    |   | 5PZ | 0.00319  | -0.02106 | -0.00005 | 0.00844  | 0.01297  |
| 372 57 | H | 1S  | -0.00014 | 0.00084  | -0.00002 | 0.00149  | -0.00127 |
| 373    |   | 2S  | -0.00201 | 0.01347  | 0.00004  | -0.00557 | -0.00520 |
| 374 58 | C | 1S  | -0.00100 | 0.00623  | -0.00003 | 0.00273  | 0.00065  |
| 375    |   | 2S  | 0.00161  | -0.01027 | 0.00006  | -0.00550 | -0.00224 |
| 376    |   | 3S  | 0.00962  | -0.05960 | 0.00036  | -0.03305 | 0.00178  |
| 377    |   | 4PX | -0.00375 | 0.02344  | -0.00012 | 0.01147  | -0.09256 |
| 378    |   | 4PY | 0.00279  | -0.01740 | 0.00010  | -0.00892 | -0.11649 |
| 379    |   | 4PZ | 0.00196  | -0.01232 | 0.00011  | -0.01043 | 0.02396  |
| 380    |   | 5PX | 0.00844  | -0.05165 | -0.00002 | -0.00126 | -0.07415 |
| 381    |   | 5PY | -0.00929 | 0.05721  | 0.00018  | -0.01415 | -0.08240 |
| 382    |   | 5PZ | 0.00302  | -0.01917 | 0.00035  | -0.03089 | 0.02007  |
| 383 59 | H | 1S  | 0.00172  | -0.01081 | 0.00006  | -0.00573 | -0.00236 |
| 384    |   | 2S  | 0.00254  | -0.01499 | -0.00027 | 0.02231  | -0.00853 |
| 385 60 | C | 1S  | 0.00002  | -0.00021 | 0.00000  | -0.00016 | 0.00183  |
| 386    |   | 2S  | -0.00021 | 0.00051  | 0.00000  | 0.00046  | -0.00187 |
| 387    |   | 3S  | -0.00152 | 0.01430  | 0.00008  | -0.00139 | -0.03461 |
| 388    |   | 4PX | -0.00019 | 0.00111  | 0.00000  | -0.00032 | -0.09905 |
| 389    |   | 4PY | -0.00024 | 0.00169  | 0.00000  | 0.00031  | -0.10544 |
| 390    |   | 4PZ | 0.00027  | -0.00168 | 0.00001  | -0.00074 | 0.03811  |
| 391    |   | 5PX | 0.00247  | -0.00970 | -0.00016 | 0.00032  | -0.05313 |
| 392    |   | 5PY | -0.00202 | 0.00772  | 0.00009  | -0.00015 | -0.04588 |
| 393    |   | 5PZ | 0.00274  | -0.00843 | -0.00030 | 0.00242  | 0.01828  |
| 394 61 | C | 1S  | 0.00001  | -0.00016 | 0.00000  | 0.00005  | 0.00009  |
| 395    |   | 2S  | 0.00005  | -0.00014 | -0.00001 | -0.00006 | -0.00192 |
| 396    |   | 3S  | -0.00099 | 0.00360  | -0.00009 | -0.00022 | 0.02930  |

|     |    |      |          |          |          |          |          |
|-----|----|------|----------|----------|----------|----------|----------|
| 397 |    | 4PX  | 0.00015  | -0.00063 | -0.00002 | 0.00035  | 0.00292  |
| 398 |    | 4PY  | 0.00002  | -0.00018 | 0.00001  | -0.00040 | 0.01358  |
| 399 |    | 4PZ  | -0.00004 | -0.00007 | 0.00002  | -0.00008 | -0.00506 |
| 400 |    | 5PX  | 0.00220  | -0.00281 | -0.00013 | 0.00114  | -0.05437 |
| 401 |    | 5PY  | -0.00041 | 0.00229  | -0.00011 | 0.00056  | -0.04083 |
| 402 |    | 5PZ  | 0.00005  | -0.00044 | 0.00002  | -0.00075 | 0.00197  |
| 403 | 62 | H 1S | 0.00009  | -0.00037 | 0.00000  | 0.00008  | 0.01291  |
| 404 |    | 2S   | -0.00049 | 0.00110  | -0.00002 | -0.00059 | 0.03821  |
| 405 | 63 | H 1S | -0.00011 | 0.00047  | 0.00000  | 0.00005  | -0.02295 |
| 406 |    | 2S   | 0.00049  | 0.00131  | -0.00009 | 0.00087  | -0.08870 |
| 407 | 64 | C 1S | -0.00004 | 0.00003  | 0.00002  | 0.00001  | -0.00360 |
| 408 |    | 2S   | -0.00012 | -0.00036 | -0.00002 | 0.00001  | 0.00492  |
| 409 |    | 3S   | 0.00145  | 0.00064  | -0.00053 | -0.00004 | 0.06056  |
| 410 |    | 4PX  | -0.00001 | 0.00048  | -0.00010 | -0.00005 | -0.01001 |
| 411 |    | 4PY  | -0.00007 | 0.00007  | 0.00007  | 0.00005  | 0.00414  |
| 412 |    | 4PZ  | -0.00016 | 0.00044  | 0.00004  | -0.00002 | -0.01146 |
| 413 |    | 5PX  | 0.00211  | -0.00418 | -0.00047 | 0.00011  | 0.03601  |
| 414 |    | 5PY  | -0.00253 | 0.00105  | 0.00024  | -0.00089 | 0.06318  |
| 415 |    | 5PZ  | 0.00031  | -0.00038 | -0.00035 | 0.00067  | -0.02942 |
| 416 | 65 | H 1S | -0.00015 | -0.00007 | 0.00004  | 0.00004  | 0.00199  |
| 417 |    | 2S   | 0.00072  | -0.00076 | 0.00008  | -0.00026 | 0.02176  |
| 418 | 66 | H 1S | -0.00006 | 0.00003  | -0.00001 | 0.00003  | -0.00134 |
| 419 |    | 2S   | 0.00102  | 0.00114  | 0.00001  | 0.00040  | -0.05691 |
| 420 | 67 | O 1S | 0.00001  | -0.00008 | 0.00000  | -0.00004 | -0.00017 |
| 421 |    | 2S   | -0.00003 | 0.00037  | 0.00001  | 0.00006  | -0.00010 |
| 422 |    | 3S   | 0.00011  | -0.00186 | -0.00003 | 0.00042  | 0.00430  |
| 423 |    | 4PX  | -0.00038 | 0.00224  | -0.00001 | 0.00041  | -0.07830 |
| 424 |    | 4PY  | 0.00006  | -0.00065 | -0.00002 | 0.00045  | 0.08290  |
| 425 |    | 4PZ  | 0.00002  | -0.00040 | -0.00002 | 0.00057  | 0.02846  |
| 426 |    | 5PX  | -0.00033 | 0.00201  | 0.00001  | -0.00012 | -0.06288 |
| 427 |    | 5PY  | 0.00010  | 0.00004  | 0.00001  | 0.00014  | 0.06383  |
| 428 |    | 5PZ  | 0.00029  | -0.00177 | 0.00002  | -0.00013 | 0.02372  |
| 429 | 68 | N 1S | 0.00033  | -0.00208 | -0.00001 | 0.00052  | -0.00285 |
| 430 |    | 2S   | -0.00071 | 0.00446  | 0.00001  | -0.00092 | 0.00686  |
| 431 |    | 3S   | -0.00219 | 0.01348  | 0.00003  | -0.00308 | 0.01950  |
| 432 |    | 4PX  | -0.00011 | 0.00073  | -0.00006 | 0.00542  | -0.11128 |
| 433 |    | 4PY  | -0.00179 | 0.01110  | 0.00009  | -0.00905 | 0.15153  |
| 434 |    | 4PZ  | -0.00114 | 0.00709  | 0.00001  | -0.00097 | 0.03099  |
| 435 |    | 5PX  | -0.00012 | 0.00071  | -0.00001 | 0.00167  | -0.10696 |
| 436 |    | 5PY  | 0.00067  | -0.00434 | 0.00014  | -0.01245 | 0.13951  |



|     |    |      |          |          |          |          |          |
|-----|----|------|----------|----------|----------|----------|----------|
| 437 |    | 5PZ  | -0.00333 | 0.02094  | 0.00007  | -0.00654 | 0.02866  |
| 438 | 69 | N 1S | 0.00008  | -0.00054 | 0.00000  | 0.00009  | 0.00008  |
| 439 |    | 2S   | -0.00003 | 0.00025  | 0.00000  | -0.00036 | -0.00103 |
| 440 |    | 3S   | -0.00192 | 0.01188  | 0.00004  | 0.00027  | 0.00412  |
| 441 |    | 4PX  | 0.00013  | -0.00063 | 0.00001  | -0.00018 | 0.02218  |
| 442 |    | 4PY  | -0.00084 | 0.00517  | 0.00001  | -0.00066 | -0.02460 |
| 443 |    | 4PZ  | -0.00014 | 0.00082  | 0.00000  | 0.00035  | -0.00941 |
| 444 |    | 5PX  | -0.00088 | 0.00237  | -0.00008 | 0.00212  | 0.04156  |
| 445 |    | 5PY  | -0.00056 | 0.00139  | -0.00004 | 0.00088  | -0.03397 |
| 446 |    | 5PZ  | -0.00398 | 0.02141  | -0.00014 | 0.00223  | -0.02099 |
| 447 | 70 | H 1S | 0.00028  | -0.00188 | -0.00001 | 0.00067  | 0.00351  |
| 448 |    | 2S   | 0.00203  | -0.01155 | 0.00001  | 0.00288  | 0.01588  |
| 449 | 71 | C 1S | 0.00029  | -0.00183 | -0.00002 | 0.00180  | -0.00026 |
| 450 |    | 2S   | -0.00053 | 0.00322  | 0.00004  | -0.00407 | -0.00006 |
| 451 |    | 3S   | -0.00255 | 0.01488  | 0.00023  | -0.02277 | 0.01666  |
| 452 |    | 4PX  | 0.00099  | -0.00612 | 0.00001  | -0.00099 | 0.07732  |
| 453 |    | 4PY  | -0.00164 | 0.01033  | 0.00001  | -0.00083 | -0.09238 |
| 454 |    | 4PZ  | -0.00157 | 0.00985  | 0.00015  | -0.01417 | -0.01335 |
| 455 |    | 5PX  | 0.00512  | -0.03287 | -0.00017 | 0.01411  | 0.03737  |
| 456 |    | 5PY  | 0.00703  | -0.04431 | -0.00021 | 0.01894  | -0.07441 |
| 457 |    | 5PZ  | 0.00405  | -0.02657 | 0.00009  | -0.00989 | -0.00845 |
| 458 | 72 | H 1S | -0.00050 | 0.00310  | 0.00005  | -0.00521 | -0.00033 |
| 459 |    | 2S   | -0.00408 | 0.02672  | -0.00006 | 0.00727  | -0.00603 |
| 460 | 73 | C 1S | -0.00010 | 0.00058  | 0.00001  | -0.00083 | -0.00011 |
| 461 |    | 2S   | 0.00012  | -0.00098 | -0.00001 | 0.00042  | 0.00141  |
| 462 |    | 3S   | 0.00199  | -0.01044 | -0.00021 | 0.02350  | -0.01325 |
| 463 |    | 4PX  | 0.00172  | -0.01084 | -0.00003 | 0.00278  | 0.05430  |
| 464 |    | 4PY  | -0.00152 | 0.00961  | -0.00002 | 0.00184  | -0.06403 |
| 465 |    | 4PZ  | -0.00028 | 0.00170  | -0.00002 | 0.00164  | -0.01379 |
| 466 |    | 5PX  | 0.00713  | -0.04308 | -0.00002 | 0.00595  | 0.06228  |
| 467 |    | 5PY  | 0.00127  | -0.00674 | 0.00006  | -0.00213 | -0.09328 |
| 468 |    | 5PZ  | 0.00387  | -0.02549 | -0.00014 | 0.00863  | -0.02088 |
| 469 | 74 | H 1S | 0.00010  | -0.00069 | -0.00001 | 0.00102  | -0.00148 |
| 470 |    | 2S   | 0.00084  | -0.00403 | 0.00006  | -0.00259 | -0.00657 |
| 471 | 75 | C 1S | -0.00018 | 0.00110  | 0.00000  | -0.00019 | -0.00016 |
| 472 |    | 2S   | 0.00031  | -0.00211 | -0.00001 | 0.00051  | 0.00165  |
| 473 |    | 3S   | 0.00396  | -0.02167 | 0.00008  | -0.00381 | -0.00861 |
| 474 |    | 4PX  | -0.00038 | 0.00238  | -0.00001 | 0.00058  | -0.15046 |
| 475 |    | 4PY  | 0.00167  | -0.01053 | -0.00003 | 0.00286  | 0.17423  |
| 476 |    | 4PZ  | -0.00087 | 0.00551  | 0.00006  | -0.00523 | 0.03374  |

|     |    |     |          |          |          |          |          |          |
|-----|----|-----|----------|----------|----------|----------|----------|----------|
| 477 |    | 5PX | -0.00541 | 0.02724  | -0.00021 | 0.00280  | -0.13906 |          |
| 478 |    | 5PY | -0.00428 | 0.02256  | -0.00020 | 0.00671  | 0.17793  |          |
| 479 |    | 5PZ | 0.00656  | -0.04521 | -0.00008 | -0.00105 | 0.03674  |          |
| 480 | 76 | C   | 1S       | 0.00045  | -0.00283 | -0.00001 | 0.00114  | -0.00029 |
| 481 |    |     | 2S       | -0.00071 | 0.00438  | 0.00002  | -0.00186 | 0.00038  |
| 482 |    |     | 3S       | -0.00579 | 0.03630  | 0.00026  | -0.02064 | 0.00537  |
| 483 |    |     | 4PX      | -0.00368 | 0.02302  | 0.00005  | -0.00462 | 0.04793  |
| 484 |    |     | 4PY      | 0.00093  | -0.00573 | 0.00003  | -0.00261 | -0.05287 |
| 485 |    |     | 4PZ      | -0.00034 | 0.00214  | 0.00001  | -0.00117 | -0.01128 |
| 486 |    |     | 5PX      | -0.00767 | 0.04805  | 0.00006  | -0.00501 | 0.05553  |
| 487 |    |     | 5PY      | -0.00288 | 0.01781  | 0.00014  | -0.01314 | -0.06188 |
| 488 |    |     | 5PZ      | -0.00319 | 0.02105  | -0.00005 | 0.00844  | -0.01300 |
| 489 | 77 | H   | 1S       | -0.00014 | 0.00084  | 0.00002  | -0.00149 | -0.00127 |
| 490 |    |     | 2S       | -0.00201 | 0.01347  | -0.00004 | 0.00557  | -0.00520 |
| 491 | 78 | C   | 1S       | -0.00100 | 0.00623  | 0.00003  | -0.00273 | 0.00065  |
| 492 |    |     | 2S       | 0.00161  | -0.01026 | -0.00006 | 0.00550  | -0.00224 |
| 493 |    |     | 3S       | 0.00961  | -0.05959 | -0.00036 | 0.03304  | 0.00180  |
| 494 |    |     | 4PX      | 0.00375  | -0.02344 | -0.00012 | 0.01147  | 0.09273  |
| 495 |    |     | 4PY      | 0.00279  | -0.01740 | -0.00010 | 0.00892  | -0.11670 |
| 496 |    |     | 4PZ      | -0.00196 | 0.01232  | 0.00011  | -0.01043 | -0.02399 |
| 497 |    |     | 5PX      | -0.00843 | 0.05165  | -0.00002 | -0.00125 | 0.07425  |
| 498 |    |     | 5PY      | -0.00929 | 0.05721  | -0.00018 | 0.01415  | -0.08256 |
| 499 |    |     | 5PZ      | -0.00302 | 0.01917  | 0.00035  | -0.03089 | -0.02012 |
| 500 | 79 | H   | 1S       | 0.00172  | -0.01081 | -0.00006 | 0.00573  | -0.00236 |
| 501 |    |     | 2S       | 0.00254  | -0.01499 | 0.00027  | -0.02231 | -0.00853 |
| 502 | 80 | C   | 1S       | 0.00002  | -0.00021 | 0.00000  | 0.00016  | 0.00183  |
| 503 |    |     | 2S       | -0.00021 | 0.00051  | 0.00000  | -0.00046 | -0.00187 |
| 504 |    |     | 3S       | -0.00152 | 0.01430  | -0.00008 | 0.00139  | -0.03466 |
| 505 |    |     | 4PX      | 0.00019  | -0.00111 | 0.00000  | -0.00032 | 0.09926  |
| 506 |    |     | 4PY      | -0.00024 | 0.00169  | 0.00000  | -0.00031 | -0.10567 |
| 507 |    |     | 4PZ      | -0.00027 | 0.00168  | 0.00001  | -0.00074 | -0.03819 |
| 508 |    |     | 5PX      | -0.00247 | 0.00970  | -0.00016 | 0.00032  | 0.05322  |
| 509 |    |     | 5PY      | -0.00202 | 0.00772  | -0.00009 | 0.00015  | -0.04601 |
| 510 |    |     | 5PZ      | -0.00274 | 0.00843  | -0.00030 | 0.00242  | -0.01836 |
| 511 | 81 | C   | 1S       | 0.00001  | -0.00016 | 0.00000  | -0.00005 | 0.00010  |
| 512 |    |     | 2S       | 0.00005  | -0.00014 | 0.00001  | 0.00006  | -0.00193 |
| 513 |    |     | 3S       | -0.00099 | 0.00360  | 0.00009  | 0.00022  | 0.02934  |
| 514 |    |     | 4PX      | -0.00015 | 0.00063  | -0.00002 | 0.00035  | -0.00290 |
| 515 |    |     | 4PY      | 0.00002  | -0.00018 | -0.00001 | 0.00040  | 0.01360  |
| 516 |    |     | 4PZ      | 0.00004  | 0.00007  | 0.00002  | -0.00008 | 0.00506  |

|     |    |      |          |          |          |          |          |
|-----|----|------|----------|----------|----------|----------|----------|
| 517 |    | 5PX  | -0.00219 | 0.00281  | -0.00013 | 0.00114  | 0.05448  |
| 518 |    | 5PY  | -0.00041 | 0.00229  | 0.00011  | -0.00056 | -0.04094 |
| 519 |    | 5PZ  | -0.00005 | 0.00044  | 0.00002  | -0.00075 | -0.00202 |
| 520 | 82 | H 1S | 0.00009  | -0.00037 | 0.00000  | -0.00008 | 0.01293  |
| 521 |    | 2S   | -0.00049 | 0.00110  | 0.00002  | 0.00059  | 0.03836  |
| 522 | 83 | H 1S | -0.00011 | 0.00047  | 0.00000  | -0.00005 | -0.02300 |
| 523 |    | 2S   | 0.00049  | 0.00131  | 0.00009  | -0.00087 | -0.08890 |
| 524 | 84 | C 1S | -0.00004 | 0.00003  | -0.00002 | -0.00001 | -0.00361 |
| 525 |    | 2S   | -0.00012 | -0.00036 | 0.00002  | -0.00001 | 0.00493  |
| 526 |    | 3S   | 0.00145  | 0.00064  | 0.00053  | 0.00004  | 0.06079  |
| 527 |    | 4PX  | 0.00001  | -0.00048 | -0.00010 | -0.00005 | 0.01003  |
| 528 |    | 4PY  | -0.00007 | 0.00007  | -0.00007 | -0.00005 | 0.00417  |
| 529 |    | 4PZ  | 0.00016  | -0.00044 | 0.00004  | -0.00002 | 0.01148  |
| 530 |    | 5PX  | -0.00211 | 0.00418  | -0.00047 | 0.00011  | -0.03619 |
| 531 |    | 5PY  | -0.00253 | 0.00105  | -0.00024 | 0.00089  | 0.06336  |
| 532 |    | 5PZ  | -0.00031 | 0.00038  | -0.00035 | 0.00067  | 0.02941  |
| 533 | 85 | H 1S | -0.00015 | -0.00007 | -0.00004 | -0.00004 | 0.00200  |
| 534 |    | 2S   | 0.00072  | -0.00076 | -0.00008 | 0.00026  | 0.02181  |
| 535 | 86 | H 1S | -0.00006 | 0.00003  | 0.00001  | -0.00003 | -0.00133 |
| 536 |    | 2S   | 0.00102  | 0.00114  | -0.00001 | -0.00040 | -0.05710 |

HOMO (#92) and LUMO(#93) for **3**:

|                |         | 91       | 92       | 93       | 94       | 95       |
|----------------|---------|----------|----------|----------|----------|----------|
|                |         | O        | O        | V        | V        | V        |
| EIGENVALUES -- |         | -0.21169 | -0.20714 | -0.09227 | -0.08495 | -0.07011 |
| 1              | 1 Zn 1S | 0.00167  | 0.00011  | -0.01379 | 0.00561  | 0.00258  |
| 2              | 2S      | 0.01282  | 0.00181  | 0.01186  | -0.00813 | -0.00066 |
| 3              | 3PX     | 0.01473  | 0.00593  | 0.00702  | 0.02770  | 0.00158  |
| 4              | 3PY     | -0.00475 | -0.00285 | 0.03812  | -0.00965 | -0.00489 |
| 5              | 3PZ     | 0.00336  | -0.05338 | 0.00813  | 0.01116  | 0.02496  |
| 6              | 4PX     | 0.01435  | 0.00064  | 0.00139  | 0.01070  | -0.00840 |
| 7              | 4PY     | -0.00400 | -0.00231 | -0.00285 | 0.00643  | 0.00227  |
| 8              | 4PZ     | -0.00326 | 0.09278  | -0.00039 | -0.00630 | -0.01059 |
| 9              | 5D 0    | -0.00566 | -0.00245 | 0.00142  | 0.00058  | -0.00040 |
| 10             | 5D+1    | -0.05652 | -0.00162 | -0.00444 | -0.00126 | 0.00035  |
| 11             | 5D-1    | -0.00271 | 0.06235  | 0.00651  | 0.00844  | 0.01527  |
| 12             | 5D+2    | 0.00060  | -0.00022 | -0.04068 | 0.01168  | 0.00358  |
| 13             | 5D-2    | -0.00926 | -0.00326 | -0.00568 | -0.02171 | 0.00200  |
| 14             | 6D 0    | -0.00092 | -0.00041 | -0.00109 | 0.00063  | 0.00008  |
| 15             | 6D+1    | -0.00711 | -0.00018 | -0.00059 | -0.00007 | 0.00007  |

|    |   |      |          |          |          |          |          |
|----|---|------|----------|----------|----------|----------|----------|
| 16 |   | 6D-1 | -0.00036 | 0.00704  | 0.00078  | 0.00111  | 0.00134  |
| 17 |   | 6D+2 | 0.00026  | 0.00015  | -0.00532 | 0.00161  | 0.00040  |
| 18 |   | 6D-2 | -0.00194 | -0.00060 | -0.00105 | -0.00510 | 0.00066  |
| 19 | 2 | I 1S | 0.00070  | -0.00893 | -0.00245 | -0.00040 | -0.00110 |
| 20 |   | 2S   | 0.00115  | -0.03017 | -0.00990 | 0.00014  | -0.00384 |
| 21 |   | 3PX  | 0.42876  | 0.02237  | -0.00489 | -0.00663 | -0.01048 |
| 22 |   | 3PY  | -0.00688 | -0.26815 | 0.00096  | 0.00403  | 0.01456  |
| 23 |   | 3PZ  | -0.00232 | 0.29125  | 0.01575  | 0.00331  | 0.00097  |
| 24 |   | 4PX  | 0.42464  | 0.02173  | -0.00443 | -0.01130 | -0.00339 |
| 25 |   | 4PY  | -0.00720 | -0.27360 | 0.00332  | 0.00470  | 0.01799  |
| 26 |   | 4PZ  | -0.00075 | 0.27504  | 0.02204  | 0.00435  | 0.00995  |
| 27 | 3 | I 1S | 0.00030  | 0.00879  | -0.00086 | 0.00122  | 0.00138  |
| 28 |   | 2S   | -0.00019 | 0.03068  | -0.00468 | 0.00341  | 0.00475  |
| 29 |   | 3PX  | -0.31537 | 0.00214  | -0.00021 | -0.00705 | 0.00928  |
| 30 |   | 3PY  | -0.02595 | 0.24600  | -0.00601 | -0.00401 | -0.01283 |
| 31 |   | 3PZ  | -0.01484 | 0.27893  | -0.00625 | 0.00641  | 0.00133  |
| 32 |   | 4PX  | -0.32090 | 0.00097  | -0.00208 | -0.01131 | 0.00831  |
| 33 |   | 4PY  | -0.02725 | 0.25195  | -0.00709 | -0.00818 | -0.01753 |
| 34 |   | 4PZ  | -0.01419 | 0.26237  | -0.00982 | 0.01027  | 0.01158  |
| 35 | 4 | O 1S | 0.00006  | 0.00002  | -0.00036 | 0.00004  | -0.00085 |
| 36 |   | 2S   | 0.00003  | 0.00002  | 0.00115  | 0.00012  | 0.00206  |
| 37 |   | 3S   | -0.00206 | -0.00080 | 0.00188  | -0.00079 | 0.00326  |
| 38 |   | 4PX  | 0.00324  | 0.00004  | 0.15621  | 0.09502  | -0.05208 |
| 39 |   | 4PY  | -0.00086 | -0.00131 | 0.08882  | 0.05987  | -0.02318 |
| 40 |   | 4PZ  | 0.00132  | 0.00001  | 0.06960  | 0.04470  | -0.02166 |
| 41 |   | 5PX  | 0.00061  | -0.00017 | 0.12852  | 0.07919  | -0.04106 |
| 42 |   | 5PY  | 0.00146  | -0.00029 | 0.06016  | 0.04573  | -0.01941 |
| 43 |   | 5PZ  | 0.00161  | 0.00025  | 0.05533  | 0.03625  | -0.01716 |
| 44 | 5 | O 1S | -0.00003 | -0.00001 | -0.00040 | 0.00005  | 0.00160  |
| 45 |   | 2S   | 0.00020  | -0.00007 | -0.00009 | -0.00046 | -0.00395 |
| 46 |   | 3S   | -0.00146 | 0.00089  | 0.00919  | 0.00009  | -0.00739 |
| 47 |   | 4PX  | -0.00046 | -0.00008 | -0.11096 | 0.21233  | -0.05908 |
| 48 |   | 4PY  | -0.00050 | 0.00109  | 0.04859  | -0.08900 | 0.01470  |
| 49 |   | 4PZ  | -0.00037 | 0.00017  | -0.01566 | 0.03100  | -0.00922 |
| 50 |   | 5PX  | 0.00088  | -0.00024 | -0.09192 | 0.17558  | -0.04294 |
| 51 |   | 5PY  | 0.00161  | -0.00007 | 0.03056  | -0.06487 | 0.01519  |
| 52 |   | 5PZ  | -0.00081 | 0.00010  | -0.01320 | 0.02236  | -0.00730 |
| 53 | 6 | N 1S | 0.00336  | 0.00138  | -0.00498 | 0.00504  | -0.00045 |
| 54 |   | 2S   | -0.00751 | -0.00305 | 0.01464  | -0.00860 | 0.00183  |
| 55 |   | 3S   | -0.01308 | -0.00562 | 0.01923  | -0.04303 | -0.00045 |

|    |    |      |          |          |          |          |          |
|----|----|------|----------|----------|----------|----------|----------|
| 56 |    | 4PX  | 0.00540  | -0.00206 | 0.22922  | 0.15950  | -0.03643 |
| 57 |    | 4PY  | -0.01621 | -0.00974 | 0.21421  | 0.10173  | -0.02946 |
| 58 |    | 4PZ  | -0.00384 | -0.00005 | 0.07030  | 0.03636  | -0.01934 |
| 59 |    | 5PX  | 0.01587  | -0.00129 | 0.21770  | 0.13847  | -0.04172 |
| 60 |    | 5PY  | -0.00813 | -0.01002 | 0.18680  | 0.08585  | -0.02598 |
| 61 |    | 5PZ  | -0.03031 | -0.00137 | 0.06198  | 0.02472  | -0.01158 |
| 62 | 7  | N 1S | 0.00022  | 0.00004  | -0.00052 | 0.00089  | -0.00024 |
| 63 |    | 2S   | -0.00083 | -0.00028 | 0.00125  | -0.00114 | 0.00001  |
| 64 |    | 3S   | 0.00416  | 0.00170  | 0.01332  | -0.00703 | 0.00667  |
| 65 |    | 4PX  | -0.00209 | 0.00041  | -0.03921 | -0.00972 | -0.00153 |
| 66 |    | 4PY  | -0.00331 | -0.00045 | -0.03064 | -0.00844 | 0.00223  |
| 67 |    | 4PZ  | 0.00030  | 0.00090  | -0.01670 | -0.00702 | -0.00085 |
| 68 |    | 5PX  | 0.00272  | 0.00118  | -0.07842 | -0.02397 | 0.00232  |
| 69 |    | 5PY  | 0.00049  | 0.00042  | -0.01899 | -0.01410 | 0.00158  |
| 70 |    | 5PZ  | -0.01569 | -0.00106 | -0.05880 | -0.03790 | -0.01844 |
| 71 | 8  | H 1S | -0.00131 | -0.00106 | -0.00777 | -0.00537 | -0.00049 |
| 72 |    | 2S   | -0.01376 | -0.00438 | -0.04291 | -0.03205 | -0.01669 |
| 73 | 9  | N 1S | 0.00015  | -0.00015 | -0.00075 | -0.00056 | 0.00026  |
| 74 |    | 2S   | -0.00060 | 0.00028  | 0.00191  | 0.00211  | 0.00063  |
| 75 |    | 3S   | 0.00441  | 0.00029  | 0.00829  | -0.00936 | -0.01616 |
| 76 |    | 4PX  | -0.00033 | 0.00055  | 0.01408  | 0.00526  | 0.00315  |
| 77 |    | 4PY  | -0.00071 | 0.00071  | -0.01070 | 0.00433  | -0.00162 |
| 78 |    | 4PZ  | -0.00110 | 0.00066  | 0.00470  | 0.00085  | -0.00264 |
| 79 |    | 5PX  | -0.00325 | 0.00218  | 0.04169  | -0.05110 | -0.01870 |
| 80 |    | 5PY  | -0.00050 | 0.00231  | -0.00055 | -0.00026 | 0.01211  |
| 81 |    | 5PZ  | 0.01574  | -0.00164 | 0.01548  | -0.02403 | -0.04805 |
| 82 | 10 | H 1S | -0.00113 | 0.00097  | -0.00199 | 0.00372  | 0.00414  |
| 83 |    | 2S   | -0.01535 | 0.00564  | -0.01455 | 0.02452  | 0.05003  |
| 84 | 11 | N 1S | -0.00090 | -0.00073 | -0.00682 | -0.00057 | 0.00182  |
| 85 |    | 2S   | 0.00185  | 0.00126  | 0.01716  | -0.00219 | -0.00481 |
| 86 |    | 3S   | 0.00733  | 0.00623  | 0.03795  | 0.01723  | -0.00982 |
| 87 |    | 4PX  | -0.00038 | -0.00026 | -0.13676 | 0.27010  | -0.01124 |
| 88 |    | 4PY  | 0.00517  | 0.00443  | 0.12549  | -0.17527 | 0.00355  |
| 89 |    | 4PZ  | 0.00083  | 0.00242  | -0.01621 | 0.01746  | -0.01128 |
| 90 |    | 5PX  | -0.00300 | -0.00299 | -0.13854 | 0.25183  | -0.01436 |
| 91 |    | 5PY  | 0.01001  | 0.00314  | 0.11121  | -0.14792 | 0.00235  |
| 92 |    | 5PZ  | 0.02890  | 0.00115  | -0.01849 | 0.01757  | -0.02545 |
| 93 | 12 | C 1S | -0.00549 | -0.00399 | -0.00010 | -0.00259 | -0.00169 |
| 94 |    | 2S   | 0.00849  | 0.00838  | 0.00116  | 0.00883  | 0.00980  |
| 95 |    | 3S   | 0.05288  | 0.04423  | 0.01087  | 0.00129  | -0.00537 |

|     |    |      |          |          |          |          |          |
|-----|----|------|----------|----------|----------|----------|----------|
| 96  |    | 4PX  | -0.01248 | -0.00752 | -0.12561 | -0.05519 | 0.11190  |
| 97  |    | 4PY  | 0.01649  | 0.01450  | -0.10355 | -0.04128 | 0.09137  |
| 98  |    | 4PZ  | -0.01433 | -0.01919 | -0.03913 | -0.00929 | 0.03741  |
| 99  |    | 5PX  | 0.04694  | 0.01905  | -0.07779 | -0.02417 | 0.15095  |
| 100 |    | 5PY  | -0.06984 | 0.00056  | -0.05776 | -0.02292 | 0.07564  |
| 101 |    | 5PZ  | -0.02035 | -0.02520 | -0.03150 | -0.00053 | 0.05919  |
| 102 | 13 | H 1S | 0.00905  | 0.00830  | -0.00755 | 0.00035  | 0.00360  |
| 103 |    | 2S   | 0.01364  | -0.01744 | -0.01906 | 0.00199  | 0.03024  |
| 104 | 14 | C 1S | 0.00270  | 0.00160  | -0.00080 | 0.00057  | 0.00035  |
| 105 |    | 2S   | -0.00413 | -0.00269 | 0.00340  | -0.00101 | -0.00115 |
| 106 |    | 3S   | -0.04294 | -0.02594 | -0.00189 | 0.01202  | 0.02044  |
| 107 |    | 4PX  | 0.01932  | 0.00210  | -0.15060 | -0.10822 | -0.08744 |
| 108 |    | 4PY  | -0.00289 | -0.00877 | -0.10016 | -0.08187 | -0.06375 |
| 109 |    | 4PZ  | 0.00252  | -0.00154 | -0.04866 | -0.03683 | -0.03024 |
| 110 |    | 5PX  | 0.04373  | -0.00042 | -0.16965 | -0.11241 | -0.08288 |
| 111 |    | 5PY  | -0.04849 | -0.01844 | -0.12931 | -0.09412 | -0.09821 |
| 112 |    | 5PZ  | 0.01826  | 0.01022  | -0.06321 | -0.04116 | -0.03752 |
| 113 | 15 | H 1S | -0.00043 | -0.00164 | -0.00382 | -0.00061 | 0.00087  |
| 114 |    | 2S   | -0.00202 | 0.00444  | -0.01360 | -0.00481 | -0.00765 |
| 115 | 16 | C 1S | -0.00021 | 0.00001  | 0.00056  | -0.00003 | 0.00059  |
| 116 |    | 2S   | 0.00089  | 0.00037  | 0.00019  | 0.00117  | -0.00073 |
| 117 |    | 3S   | -0.00215 | -0.00508 | -0.02560 | 0.00003  | -0.00135 |
| 118 |    | 4PX  | 0.00511  | 0.00161  | 0.32040  | 0.18277  | -0.04839 |
| 119 |    | 4PY  | 0.00534  | 0.00245  | 0.21627  | 0.11917  | -0.03108 |
| 120 |    | 4PZ  | -0.00699 | -0.00819 | 0.08975  | 0.05025  | -0.01726 |
| 121 |    | 5PX  | -0.00350 | 0.00138  | 0.28133  | 0.17821  | -0.04503 |
| 122 |    | 5PY  | -0.01501 | 0.00040  | 0.24788  | 0.10850  | -0.05123 |
| 123 |    | 5PZ  | 0.06145  | 0.00110  | 0.09615  | 0.07240  | 0.03767  |
| 124 | 17 | C 1S | -0.00096 | -0.00131 | -0.00132 | -0.00006 | -0.00105 |
| 125 |    | 2S   | 0.00046  | 0.00140  | 0.00593  | 0.00184  | 0.00335  |
| 126 |    | 3S   | 0.02904  | 0.02911  | -0.01833 | -0.00701 | -0.00615 |
| 127 |    | 4PX  | -0.01096 | -0.00042 | -0.07480 | -0.03819 | 0.13206  |
| 128 |    | 4PY  | -0.00417 | 0.00574  | -0.04580 | -0.02958 | 0.10357  |
| 129 |    | 4PZ  | -0.00153 | 0.00178  | -0.02367 | -0.01393 | 0.03038  |
| 130 |    | 5PX  | -0.04366 | -0.00737 | -0.08774 | -0.04933 | 0.12047  |
| 131 |    | 5PY  | 0.03879  | 0.01036  | -0.05886 | -0.00623 | 0.12412  |
| 132 |    | 5PZ  | 0.01432  | 0.00765  | -0.03652 | -0.01858 | 0.04936  |
| 133 | 18 | H 1S | 0.00160  | 0.00202  | -0.00482 | -0.00192 | 0.00045  |
| 134 |    | 2S   | 0.00639  | -0.00085 | 0.00695  | 0.01702  | 0.00048  |
| 135 | 19 | C 1S | 0.00279  | 0.00288  | 0.00062  | -0.00169 | 0.00423  |

|     |    |      |          |          |          |          |          |
|-----|----|------|----------|----------|----------|----------|----------|
| 136 |    | 2S   | -0.00223 | -0.00452 | -0.00155 | 0.00394  | -0.01111 |
| 137 |    | 3S   | -0.03562 | -0.04407 | 0.01800  | 0.01257  | -0.04864 |
| 138 |    | 4PX  | -0.00018 | 0.00726  | -0.21325 | -0.12785 | -0.07207 |
| 139 |    | 4PY  | -0.00806 | -0.00417 | -0.16818 | -0.09725 | -0.06692 |
| 140 |    | 4PZ  | -0.01527 | -0.02027 | -0.05911 | -0.03278 | -0.03159 |
| 141 |    | 5PX  | -0.04825 | -0.00840 | -0.17564 | -0.12820 | -0.09362 |
| 142 |    | 5PY  | 0.06824  | 0.01775  | -0.12374 | -0.05419 | -0.05739 |
| 143 |    | 5PZ  | 0.01339  | -0.01849 | -0.01308 | -0.02329 | -0.04181 |
| 144 | 20 | H 1S | -0.00359 | -0.00633 | -0.00705 | 0.00042  | -0.00665 |
| 145 |    | 2S   | -0.02985 | 0.01525  | -0.03096 | -0.01992 | 0.02977  |
| 146 | 21 | C 1S | -0.00029 | -0.00029 | -0.00034 | -0.00314 | 0.00040  |
| 147 |    | 2S   | 0.00120  | 0.00077  | 0.00478  | 0.01030  | -0.00145 |
| 148 |    | 3S   | 0.00815  | 0.00152  | -0.02577 | 0.00976  | 0.01264  |
| 149 |    | 4PX  | -0.00173 | -0.00041 | -0.21346 | -0.13057 | 0.05399  |
| 150 |    | 4PY  | 0.00154  | 0.00134  | -0.10631 | -0.07981 | 0.03212  |
| 151 |    | 4PZ  | -0.00145 | -0.00080 | -0.09492 | -0.06804 | 0.02438  |
| 152 |    | 5PX  | -0.00031 | -0.00176 | -0.13378 | -0.08286 | 0.04442  |
| 153 |    | 5PY  | -0.00099 | 0.00142  | 0.01644  | -0.01575 | 0.01751  |
| 154 |    | 5PZ  | 0.00321  | 0.00154  | -0.05487 | -0.03658 | 0.01835  |
| 155 | 22 | C 1S | 0.00020  | 0.00009  | 0.00140  | 0.00295  | -0.00106 |
| 156 |    | 2S   | -0.00025 | -0.00037 | -0.00417 | -0.00931 | 0.00274  |
| 157 |    | 3S   | -0.00338 | 0.00080  | 0.03394  | 0.03595  | -0.00281 |
| 158 |    | 4PX  | 0.00113  | 0.00057  | 0.01498  | 0.00746  | -0.00209 |
| 159 |    | 4PY  | -0.00104 | -0.00065 | -0.00227 | 0.00397  | 0.00033  |
| 160 |    | 4PZ  | -0.00046 | -0.00049 | 0.00656  | 0.00389  | -0.00041 |
| 161 |    | 5PX  | 0.00088  | -0.00035 | -0.09952 | -0.02834 | 0.01247  |
| 162 |    | 5PY  | 0.00097  | 0.00112  | 0.01396  | 0.00094  | 0.00399  |
| 163 |    | 5PZ  | -0.00338 | -0.00081 | 0.01640  | 0.00812  | -0.01938 |
| 164 | 23 | H 1S | -0.00004 | 0.00002  | -0.01714 | -0.01348 | 0.00429  |
| 165 |    | 2S   | -0.00084 | -0.00023 | -0.02987 | -0.01601 | -0.00341 |
| 166 | 24 | H 1S | 0.00003  | 0.00004  | -0.01617 | -0.01801 | 0.00563  |
| 167 |    | 2S   | 0.00202  | 0.00107  | -0.06327 | -0.05039 | 0.02568  |
| 168 | 25 | C 1S | -0.00009 | 0.00000  | -0.01578 | -0.00599 | 0.00320  |
| 169 |    | 2S   | 0.00015  | 0.00004  | 0.03742  | 0.00949  | -0.00672 |
| 170 |    | 3S   | 0.00195  | -0.00049 | 0.10891  | 0.05989  | -0.01802 |
| 171 |    | 4PX  | -0.00061 | -0.00015 | -0.06620 | -0.04491 | 0.01696  |
| 172 |    | 4PY  | 0.00008  | 0.00013  | 0.01236  | -0.02395 | 0.00424  |
| 173 |    | 4PZ  | -0.00024 | -0.00002 | -0.02531 | -0.01277 | 0.00342  |
| 174 |    | 5PX  | -0.00035 | -0.00021 | -0.07151 | 0.01949  | 0.00951  |
| 175 |    | 5PY  | -0.00261 | -0.00011 | -0.06786 | -0.03844 | 0.00371  |

|     |    |      |          |          |          |          |          |
|-----|----|------|----------|----------|----------|----------|----------|
| 176 |    | 5PZ  | 0.00134  | 0.00093  | -0.01620 | 0.04818  | 0.02883  |
| 177 | 26 | H 1S | 0.00007  | 0.00007  | 0.01019  | 0.00019  | -0.00165 |
| 178 |    | 2S   | 0.00160  | 0.00036  | 0.02889  | 0.02009  | -0.00083 |
| 179 | 27 | H 1S | 0.00004  | 0.00003  | -0.00196 | 0.00422  | -0.00109 |
| 180 |    | 2S   | -0.00096 | -0.00027 | 0.01085  | -0.02779 | -0.02050 |
| 181 | 28 | C 1S | 0.00011  | 0.00006  | -0.00388 | 0.01798  | -0.00220 |
| 182 |    | 2S   | -0.00012 | -0.00014 | 0.00756  | -0.03698 | 0.00598  |
| 183 |    | 3S   | -0.00035 | -0.00032 | 0.02191  | -0.16821 | -0.00422 |
| 184 |    | 4PX  | 0.00034  | -0.00004 | 0.05777  | -0.06444 | 0.00140  |
| 185 |    | 4PY  | -0.00014 | -0.00024 | -0.01242 | -0.03162 | 0.00663  |
| 186 |    | 4PZ  | -0.00017 | -0.00005 | 0.00669  | -0.04008 | 0.00767  |
| 187 |    | 5PX  | 0.00173  | -0.00132 | 0.04636  | -0.09326 | 0.00283  |
| 188 |    | 5PY  | -0.00102 | 0.00048  | 0.04103  | -0.01561 | 0.02975  |
| 189 |    | 5PZ  | -0.00165 | -0.00023 | -0.02589 | -0.11594 | -0.02436 |
| 190 | 29 | H 1S | 0.00004  | -0.00009 | -0.00223 | -0.00018 | 0.00054  |
| 191 |    | 2S   | -0.00095 | -0.00024 | -0.02094 | -0.06875 | -0.00882 |
| 192 | 30 | H 1S | -0.00008 | 0.00012  | -0.00553 | 0.00781  | -0.00058 |
| 193 |    | 2S   | -0.00038 | 0.00029  | 0.01517  | 0.02900  | 0.02350  |
| 194 | 31 | C 1S | 0.00006  | -0.00012 | -0.00215 | -0.00386 | 0.00124  |
| 195 |    | 2S   | 0.00010  | 0.00030  | 0.00149  | 0.01085  | -0.00290 |
| 196 |    | 3S   | -0.00214 | 0.00003  | 0.07702  | -0.02956 | -0.01078 |
| 197 |    | 4PX  | -0.00046 | 0.00023  | -0.02032 | -0.00053 | 0.00406  |
| 198 |    | 4PY  | -0.00077 | 0.00072  | 0.00463  | -0.00729 | -0.00001 |
| 199 |    | 4PZ  | 0.00035  | -0.00047 | -0.00028 | -0.00370 | 0.00109  |
| 200 |    | 5PX  | -0.00075 | -0.00012 | 0.03766  | -0.13888 | -0.03088 |
| 201 |    | 5PY  | 0.00123  | -0.00121 | -0.03025 | -0.04257 | -0.00170 |
| 202 |    | 5PZ  | 0.00270  | -0.00132 | -0.01623 | 0.00335  | 0.02000  |
| 203 | 32 | H 1S | 0.00000  | 0.00003  | 0.00069  | 0.00706  | -0.00032 |
| 204 |    | 2S   | -0.00081 | 0.00061  | -0.00092 | 0.02628  | -0.01226 |
| 205 | 33 | H 1S | 0.00016  | -0.00008 | -0.02736 | 0.03827  | -0.00295 |
| 206 |    | 2S   | 0.00183  | -0.00091 | -0.10745 | 0.13275  | 0.00208  |
| 207 | 34 | C 1S | -0.00025 | 0.00030  | -0.00137 | 0.00071  | 0.00003  |
| 208 |    | 2S   | 0.00112  | -0.00088 | 0.00624  | -0.01098 | -0.00094 |
| 209 |    | 3S   | 0.00643  | -0.00024 | 0.00296  | 0.06171  | -0.00131 |
| 210 |    | 4PX  | -0.00023 | -0.00057 | 0.14518  | -0.29733 | 0.03223  |
| 211 |    | 4PY  | 0.00213  | -0.00137 | -0.06353 | 0.12281  | -0.01557 |
| 212 |    | 4PZ  | 0.00091  | -0.00096 | 0.02680  | -0.05090 | 0.00325  |
| 213 |    | 5PX  | -0.00003 | -0.00128 | 0.10144  | -0.17764 | 0.05234  |
| 214 |    | 5PY  | 0.00020  | -0.00081 | 0.02185  | 0.00141  | -0.04769 |
| 215 |    | 5PZ  | -0.00343 | 0.00265  | 0.03891  | -0.01385 | 0.00097  |



|     |    |   |     |          |          |          |          |          |
|-----|----|---|-----|----------|----------|----------|----------|----------|
| 216 | 35 | C | 1S  | -0.00040 | 0.00028  | 0.00051  | -0.00115 | 0.00027  |
| 217 |    |   | 2S  | 0.00155  | -0.00058 | -0.00134 | 0.00159  | -0.00200 |
| 218 |    |   | 3S  | 0.00218  | -0.00535 | -0.01703 | 0.03510  | -0.00309 |
| 219 |    |   | 4PX | 0.00150  | 0.00073  | -0.19114 | 0.31222  | 0.00094  |
| 220 |    |   | 4PY | 0.00142  | -0.00214 | 0.11131  | -0.18481 | -0.00230 |
| 221 |    |   | 4PZ | 0.00830  | -0.00812 | -0.01632 | 0.02525  | -0.00440 |
| 222 |    |   | 5PX | -0.00018 | 0.00250  | -0.15978 | 0.30737  | 0.02057  |
| 223 |    |   | 5PY | -0.01113 | 0.00128  | 0.16367  | -0.21007 | -0.00359 |
| 224 |    |   | 5PZ | -0.06535 | -0.00079 | 0.01238  | 0.03338  | 0.07256  |
| 225 | 36 | C | 1S  | 0.00210  | -0.00175 | -0.00043 | -0.00012 | -0.00034 |
| 226 |    |   | 2S  | -0.00248 | 0.00259  | 0.00191  | -0.00202 | 0.00228  |
| 227 |    |   | 3S  | -0.03768 | 0.03029  | -0.02438 | 0.00103  | -0.02657 |
| 228 |    |   | 4PX | -0.01742 | 0.00126  | 0.03777  | -0.14706 | -0.30716 |
| 229 |    |   | 4PY | -0.00127 | 0.01019  | -0.01645 | 0.09320  | 0.19210  |
| 230 |    |   | 4PZ | -0.00089 | -0.00080 | 0.00418  | -0.01526 | -0.03728 |
| 231 |    |   | 5PX | -0.04432 | 0.00069  | 0.06860  | -0.17485 | -0.34462 |
| 232 |    |   | 5PY | -0.05028 | 0.01663  | -0.03400 | 0.11968  | 0.25450  |
| 233 |    |   | 5PZ | -0.01119 | 0.00609  | 0.01829  | -0.02282 | -0.04964 |
| 234 | 37 | H | 1S  | -0.00120 | 0.00161  | -0.00240 | 0.00168  | 0.00116  |
| 235 |    |   | 2S  | -0.00726 | -0.00129 | -0.01073 | 0.00588  | 0.01811  |
| 236 | 38 | C | 1S  | -0.00516 | 0.00444  | 0.00193  | 0.00152  | 0.00109  |
| 237 |    |   | 2S  | 0.00808  | -0.00855 | -0.00625 | -0.00458 | -0.00793 |
| 238 |    |   | 3S  | 0.05380  | -0.05487 | 0.01512  | -0.01460 | 0.02996  |
| 239 |    |   | 4PX | 0.00713  | -0.00911 | 0.12187  | -0.14265 | 0.31788  |
| 240 |    |   | 4PY | 0.01770  | -0.01444 | -0.08606 | 0.09514  | -0.21057 |
| 241 |    |   | 4PZ | 0.01909  | -0.02319 | 0.01135  | -0.00917 | 0.02301  |
| 242 |    |   | 5PX | -0.04501 | 0.01423  | 0.10376  | -0.10328 | 0.37808  |
| 243 |    |   | 5PY | -0.08202 | 0.00569  | -0.05415 | 0.05881  | -0.17741 |
| 244 |    |   | 5PZ | 0.00951  | -0.02561 | 0.02463  | -0.00903 | 0.05083  |
| 245 | 39 | H | 1S  | 0.00774  | -0.00905 | -0.00667 | 0.00118  | -0.00160 |
| 246 |    |   | 2S  | 0.02056  | 0.02328  | -0.02723 | 0.01252  | -0.04193 |
| 247 | 40 | C | 1S  | 0.00352  | -0.00256 | 0.00069  | 0.00003  | -0.00137 |
| 248 |    |   | 2S  | -0.00375 | 0.00438  | -0.00121 | 0.00042  | 0.00541  |
| 249 |    |   | 3S  | -0.03223 | 0.03763  | 0.01849  | -0.00374 | -0.01189 |
| 250 |    |   | 4PX | -0.00476 | 0.00447  | 0.10154  | -0.20094 | -0.31023 |
| 251 |    |   | 4PY | -0.00918 | 0.00604  | -0.06774 | 0.13297  | 0.20440  |
| 252 |    |   | 4PZ | 0.01098  | -0.01955 | 0.00547  | -0.01556 | -0.02478 |
| 253 |    |   | 5PX | 0.03570  | -0.00915 | 0.06345  | -0.18307 | -0.32660 |
| 254 |    |   | 5PY | 0.06957  | -0.01155 | -0.05719 | 0.09171  | 0.16783  |
| 255 |    |   | 5PZ | -0.00616 | -0.02564 | -0.01888 | 0.01176  | -0.00939 |

|     |    |   |     |          |          |          |          |          |
|-----|----|---|-----|----------|----------|----------|----------|----------|
| 256 | 41 | H | 1S  | -0.00531 | 0.00636  | -0.00375 | 0.00263  | 0.00260  |
| 257 |    |   | 2S  | -0.02539 | -0.01842 | -0.01742 | 0.02723  | 0.01600  |
| 258 | 42 | C | 1S  | -0.00168 | 0.00130  | -0.00103 | 0.00048  | 0.00050  |
| 259 |    |   | 2S  | 0.00286  | -0.00173 | 0.00280  | -0.00251 | -0.00387 |
| 260 |    |   | 3S  | 0.02266  | -0.02500 | -0.00093 | 0.00403  | 0.02791  |
| 261 |    |   | 4PX | 0.01686  | 0.00075  | 0.08995  | -0.10272 | 0.31619  |
| 262 |    |   | 4PY | -0.00039 | -0.00661 | -0.04968 | 0.06443  | -0.20230 |
| 263 |    |   | 4PZ | 0.00048  | 0.00085  | 0.00509  | -0.00765 | 0.01073  |
| 264 |    |   | 5PX | 0.04137  | -0.00354 | 0.08921  | -0.12436 | 0.30775  |
| 265 |    |   | 5PY | 0.04396  | -0.01198 | -0.08630 | 0.05664  | -0.22323 |
| 266 |    |   | 5PZ | -0.01708 | 0.01108  | 0.01504  | -0.02697 | 0.02334  |
| 267 | 43 | H | 1S  | 0.00022  | -0.00158 | -0.00246 | 0.00215  | 0.00091  |
| 268 |    |   | 2S  | 0.00446  | 0.00337  | -0.00601 | -0.01594 | -0.00601 |

HOMO (#184) and LUMO(#185) for 4:

|                |   |       | 181      | 182      | 183      | 184      | 185      |
|----------------|---|-------|----------|----------|----------|----------|----------|
|                |   |       | (A)--O   | (A)--O   | (A)--O   | (A)--O   | (A)--V   |
| EIGENVALUES -- |   |       | -0.23814 | -0.23814 | -0.23310 | -0.23310 | -0.08373 |
| 1              | 1 | Zn 1S | -0.00091 | 0.00326  | 0.00179  | 0.00005  | -0.00342 |
| 2              |   | 2S    | -0.00449 | 0.01608  | 0.00912  | 0.00023  | 0.00781  |
| 3              |   | 3PX   | -0.00069 | 0.00247  | -0.01270 | -0.00033 | 0.02242  |
| 4              |   | 3PY   | -0.00712 | 0.02550  | 0.01148  | 0.00029  | -0.01025 |
| 5              |   | 3PZ   | -0.00005 | 0.00020  | -0.02327 | -0.00059 | -0.00613 |
| 6              |   | 4PX   | 0.00185  | -0.00662 | -0.00957 | -0.00024 | -0.00390 |
| 7              |   | 4PY   | -0.00707 | 0.02530  | 0.00766  | 0.00022  | 0.00126  |
| 8              |   | 4PZ   | 0.00408  | -0.01457 | 0.08746  | 0.00224  | -0.00033 |
| 9              |   | 5D 0  | 0.00128  | -0.00459 | -0.01609 | -0.00041 | 0.00539  |
| 10             |   | 5D+1  | 0.00391  | -0.01399 | 0.08128  | 0.00209  | -0.00812 |
| 11             |   | 5D-1  | 0.01944  | -0.06956 | -0.01393 | -0.00036 | -0.00352 |
| 12             |   | 5D+2  | 0.00106  | -0.00383 | 0.00592  | 0.00015  | 0.03011  |
| 13             |   | 5D-2  | 0.00575  | -0.02056 | -0.00032 | -0.00001 | -0.00459 |
| 14             |   | 6D 0  | 0.00027  | -0.00097 | -0.00296 | -0.00008 | 0.00050  |
| 15             |   | 6D+1  | 0.00060  | -0.00214 | 0.01257  | 0.00032  | -0.00131 |
| 16             |   | 6D-1  | 0.00310  | -0.01110 | -0.00218 | -0.00006 | -0.00054 |
| 17             |   | 6D+2  | 0.00044  | -0.00159 | 0.00050  | 0.00001  | 0.00438  |
| 18             |   | 6D-2  | 0.00122  | -0.00436 | -0.00039 | -0.00001 | -0.00004 |
| 19             | 2 | Cl 1S | -0.00033 | 0.00117  | -0.00791 | -0.00020 | -0.00110 |
| 20             |   | 2S    | -0.00070 | 0.00249  | -0.01895 | -0.00049 | -0.00330 |
| 21             |   | 3PX   | -0.00936 | 0.03349  | -0.25002 | -0.00641 | -0.00195 |
| 22             |   | 3PY   | -0.11700 | 0.41865  | 0.07968  | 0.00204  | 0.00056  |

|    |   |       |          |          |          |          |          |
|----|---|-------|----------|----------|----------|----------|----------|
| 23 |   | 3PZ   | 0.00941  | -0.03366 | 0.31100  | 0.00798  | 0.00578  |
| 24 |   | 4PX   | -0.01082 | 0.03869  | -0.28385 | -0.00728 | -0.00186 |
| 25 |   | 4PY   | -0.13149 | 0.47050  | 0.08821  | 0.00226  | 0.00244  |
| 26 |   | 4PZ   | 0.00963  | -0.03448 | 0.33990  | 0.00872  | 0.00927  |
| 27 | 3 | Cl 1S | -0.00005 | 0.00018  | 0.00729  | 0.00019  | -0.00280 |
| 28 |   | 2S    | 0.00090  | -0.00321 | 0.02339  | 0.00060  | -0.00748 |
| 29 |   | 3PX   | 0.02036  | -0.07286 | 0.19984  | 0.00513  | 0.00237  |
| 30 |   | 3PY   | 0.06665  | -0.23850 | -0.00327 | -0.00009 | 0.00358  |
| 31 |   | 3PZ   | 0.00176  | -0.00627 | 0.25221  | 0.00647  | -0.01136 |
| 32 |   | 4PX   | 0.02340  | -0.08373 | 0.22798  | 0.00585  | 0.00352  |
| 33 |   | 4PY   | 0.07723  | -0.27636 | -0.00712 | -0.00018 | 0.00271  |
| 34 |   | 4PZ   | 0.00198  | -0.00705 | 0.27425  | 0.00704  | -0.01679 |
| 35 | 4 | O 1S  | 0.00001  | -0.00005 | 0.00001  | 0.00000  | -0.00020 |
| 36 |   | 2S    | -0.00008 | 0.00024  | -0.00009 | -0.00001 | 0.00031  |
| 37 |   | 3S    | 0.00040  | -0.00132 | 0.00071  | 0.00005  | 0.00252  |
| 38 |   | 4PX   | 0.00016  | -0.00063 | 0.00074  | 0.00002  | 0.05228  |
| 39 |   | 4PY   | 0.00035  | -0.00130 | 0.00124  | 0.00002  | -0.13957 |
| 40 |   | 4PZ   | 0.00013  | -0.00047 | 0.00036  | 0.00001  | -0.04869 |
| 41 |   | 5PX   | -0.00035 | 0.00141  | 0.00012  | -0.00001 | 0.03778  |
| 42 |   | 5PY   | -0.00012 | 0.00015  | 0.00082  | 0.00002  | -0.10880 |
| 43 |   | 5PZ   | 0.00006  | -0.00036 | 0.00040  | 0.00004  | -0.03809 |
| 44 | 5 | O 1S  | -0.00005 | -0.00001 | 0.00000  | -0.00004 | -0.00029 |
| 45 |   | 2S    | -0.00014 | -0.00002 | -0.00001 | 0.00005  | 0.00146  |
| 46 |   | 3S    | 0.00264  | 0.00065  | 0.00005  | 0.00068  | -0.00327 |
| 47 |   | 4PX   | 0.00433  | 0.00116  | 0.00004  | 0.00011  | -0.06030 |
| 48 |   | 4PY   | 0.00595  | 0.00164  | -0.00003 | 0.00235  | -0.03104 |
| 49 |   | 4PZ   | 0.00201  | 0.00055  | -0.00001 | 0.00082  | -0.01284 |
| 50 |   | 5PX   | 0.00356  | 0.00096  | 0.00004  | 0.00025  | -0.04796 |
| 51 |   | 5PY   | 0.00044  | 0.00009  | -0.00011 | 0.00102  | -0.02269 |
| 52 |   | 5PZ   | 0.00140  | 0.00038  | 0.00000  | 0.00061  | -0.01167 |
| 53 | 6 | N 1S  | 0.00035  | -0.00124 | 0.00026  | 0.00001  | -0.00262 |
| 54 |   | 2S    | -0.00078 | 0.00278  | -0.00111 | -0.00003 | 0.00777  |
| 55 |   | 3S    | -0.00149 | 0.00525  | 0.00263  | 0.00008  | 0.01296  |
| 56 |   | 4PX   | -0.00093 | 0.00325  | 0.00502  | 0.00013  | 0.12617  |
| 57 |   | 4PY   | -0.00149 | 0.00539  | -0.00950 | -0.00024 | -0.19084 |
| 58 |   | 4PZ   | -0.00058 | 0.00212  | -0.00306 | -0.00008 | -0.08775 |
| 59 |   | 5PX   | -0.00602 | 0.02151  | 0.00271  | 0.00005  | 0.11027  |
| 60 |   | 5PY   | 0.00142  | -0.00505 | -0.00906 | -0.00024 | -0.18007 |
| 61 |   | 5PZ   | -0.00604 | 0.02168  | -0.01780 | -0.00047 | -0.08187 |
| 62 | 7 | N 1S  | -0.00011 | 0.00036  | -0.00008 | 0.00000  | 0.00071  |

|     |    |      |          |          |          |          |          |
|-----|----|------|----------|----------|----------|----------|----------|
| 63  |    | 2S   | 0.00017  | -0.00046 | 0.00003  | 0.00000  | -0.00236 |
| 64  |    | 3S   | 0.00045  | -0.00182 | 0.00128  | 0.00009  | 0.00015  |
| 65  |    | 4PX  | 0.00065  | -0.00258 | 0.00186  | 0.00003  | -0.01838 |
| 66  |    | 4PY  | -0.00008 | 0.00038  | -0.00152 | -0.00005 | 0.03317  |
| 67  |    | 4PZ  | 0.00006  | -0.00023 | -0.00024 | -0.00001 | 0.01661  |
| 68  |    | 5PX  | 0.00130  | -0.00495 | 0.00147  | 0.00022  | -0.01403 |
| 69  |    | 5PY  | 0.00168  | -0.00597 | -0.00057 | 0.00007  | 0.06520  |
| 70  |    | 5PZ  | -0.00340 | 0.01218  | -0.00230 | -0.00005 | 0.02530  |
| 71  | 8  | H 1S | 0.00022  | -0.00077 | 0.00070  | 0.00002  | 0.00006  |
| 72  |    | 2S   | 0.00376  | -0.01309 | 0.00336  | 0.00005  | 0.00195  |
| 73  | 9  | N 1S | -0.00026 | -0.00007 | 0.00000  | 0.00011  | -0.00036 |
| 74  |    | 2S   | 0.00093  | 0.00026  | -0.00001 | 0.00019  | 0.00104  |
| 75  |    | 3S   | -0.00423 | -0.00118 | 0.00017  | -0.00401 | 0.00321  |
| 76  |    | 4PX  | -0.00957 | -0.00273 | 0.00008  | -0.00194 | 0.01674  |
| 77  |    | 4PY  | -0.00205 | -0.00059 | 0.00003  | -0.00070 | 0.00703  |
| 78  |    | 4PZ  | -0.00025 | -0.00008 | -0.00002 | 0.00070  | 0.00419  |
| 79  |    | 5PX  | -0.00482 | -0.00142 | -0.00001 | -0.00153 | 0.02095  |
| 80  |    | 5PY  | 0.00389  | 0.00097  | 0.00016  | -0.00170 | 0.01193  |
| 81  |    | 5PZ  | -0.01882 | -0.00519 | 0.00008  | 0.00060  | 0.00491  |
| 82  | 10 | H 1S | 0.00114  | 0.00032  | -0.00003 | 0.00098  | 0.00114  |
| 83  |    | 2S   | 0.01523  | 0.00413  | -0.00015 | 0.00196  | 0.00193  |
| 84  | 11 | N 1S | -0.00540 | -0.00151 | 0.00005  | -0.00174 | -0.00370 |
| 85  |    | 2S   | 0.01189  | 0.00332  | -0.00010 | 0.00374  | 0.00854  |
| 86  |    | 3S   | 0.02564  | 0.00716  | -0.00017 | 0.00690  | 0.02335  |
| 87  |    | 4PX  | -0.02498 | -0.00701 | 0.00032  | -0.01195 | -0.10068 |
| 88  |    | 4PY  | 0.01768  | 0.00493  | -0.00008 | 0.00319  | -0.02604 |
| 89  |    | 4PZ  | -0.00701 | -0.00197 | 0.00003  | -0.00087 | -0.02454 |
| 90  |    | 5PX  | -0.00906 | -0.00255 | 0.00040  | -0.01463 | -0.09343 |
| 91  |    | 5PY  | 0.02761  | 0.00771  | -0.00033 | 0.01228  | -0.03243 |
| 92  |    | 5PZ  | -0.03055 | -0.00854 | 0.00028  | -0.01168 | -0.02558 |
| 93  | 12 | C 1S | 0.00151  | -0.00539 | 0.00316  | 0.00008  | -0.00025 |
| 94  |    | 2S   | -0.00202 | 0.00724  | -0.00627 | -0.00016 | 0.00043  |
| 95  |    | 3S   | -0.02006 | 0.07144  | -0.02914 | -0.00070 | 0.01236  |
| 96  |    | 4PX  | -0.00639 | 0.02290  | -0.01169 | -0.00030 | -0.08073 |
| 97  |    | 4PY  | -0.00103 | 0.00370  | -0.00624 | -0.00016 | 0.13385  |
| 98  |    | 4PZ  | -0.00489 | 0.01750  | -0.01592 | -0.00041 | 0.06123  |
| 99  |    | 5PX  | 0.02174  | -0.07782 | 0.00831  | 0.00027  | -0.04944 |
| 100 |    | 5PY  | 0.01261  | -0.04512 | 0.02575  | 0.00068  | 0.09817  |
| 101 |    | 5PZ  | -0.00621 | 0.02211  | -0.01721 | -0.00041 | 0.04801  |
| 102 | 13 | H 1S | -0.00263 | 0.00943  | -0.00729 | -0.00018 | -0.00335 |

|     |    |      |          |          |          |          |          |
|-----|----|------|----------|----------|----------|----------|----------|
| 103 |    | 2S   | 0.00019  | -0.00055 | 0.01347  | 0.00029  | -0.01271 |
| 104 | 14 | C 1S | -0.00068 | 0.00242  | -0.00130 | -0.00003 | -0.00062 |
| 105 |    | 2S   | 0.00037  | -0.00132 | 0.00161  | 0.00005  | 0.00191  |
| 106 |    | 3S   | 0.01743  | -0.06205 | 0.02730  | 0.00062  | 0.00583  |
| 107 |    | 4PX  | 0.00182  | -0.00655 | 0.00719  | 0.00018  | -0.04294 |
| 108 |    | 4PY  | 0.00356  | -0.01281 | 0.00092  | 0.00002  | 0.08601  |
| 109 |    | 4PZ  | 0.00069  | -0.00255 | -0.00134 | -0.00003 | 0.03534  |
| 110 |    | 5PX  | 0.01235  | -0.04405 | 0.01466  | 0.00035  | -0.06300 |
| 111 |    | 5PY  | 0.00898  | -0.03187 | -0.00543 | -0.00019 | 0.10730  |
| 112 |    | 5PZ  | 0.00062  | -0.00236 | -0.00191 | 0.00003  | 0.04634  |
| 113 | 15 | H 1S | 0.00032  | -0.00115 | 0.00116  | 0.00003  | -0.00352 |
| 114 |    | 2S   | 0.00197  | -0.00691 | 0.00021  | -0.00005 | -0.00731 |
| 115 | 16 | C 1S | 0.00031  | -0.00110 | 0.00043  | 0.00001  | 0.00054  |
| 116 |    | 2S   | -0.00048 | 0.00164  | -0.00017 | 0.00000  | 0.00000  |
| 117 |    | 3S   | -0.00688 | 0.02474  | -0.01124 | -0.00045 | -0.03050 |
| 118 |    | 4PX  | -0.00141 | 0.00516  | -0.00403 | -0.00009 | 0.12671  |
| 119 |    | 4PY  | 0.00050  | -0.00172 | 0.00398  | 0.00011  | -0.24945 |
| 120 |    | 4PZ  | -0.00182 | 0.00651  | -0.00434 | -0.00012 | -0.09896 |
| 121 |    | 5PX  | 0.00489  | -0.01785 | -0.00276 | 0.00025  | 0.13445  |
| 122 |    | 5PY  | -0.00152 | 0.00501  | 0.00450  | 0.00028  | -0.23739 |
| 123 |    | 5PZ  | 0.01149  | -0.04130 | 0.00311  | 0.00008  | -0.09691 |
| 124 | 17 | C 1S | 0.00033  | -0.00120 | 0.00109  | 0.00003  | -0.00069 |
| 125 |    | 2S   | -0.00030 | 0.00107  | 0.00009  | 0.00000  | 0.00243  |
| 126 |    | 3S   | -0.00781 | 0.02786  | -0.03513 | -0.00088 | -0.00461 |
| 127 |    | 4PX  | -0.00044 | 0.00161  | -0.00613 | -0.00016 | -0.04647 |
| 128 |    | 4PY  | -0.00248 | 0.00882  | 0.00286  | 0.00007  | 0.08526  |
| 129 |    | 4PZ  | -0.00052 | 0.00182  | 0.00299  | 0.00008  | 0.03282  |
| 130 |    | 5PX  | -0.00800 | 0.02871  | -0.01193 | -0.00031 | -0.05602 |
| 131 |    | 5PY  | -0.01084 | 0.03879  | -0.01254 | -0.00031 | 0.09003  |
| 132 |    | 5PZ  | 0.00695  | -0.02487 | 0.01551  | 0.00037  | 0.05409  |
| 133 | 18 | H 1S | 0.00003  | -0.00011 | -0.00069 | -0.00002 | -0.00281 |
| 134 |    | 2S   | 0.00111  | -0.00388 | 0.00421  | 0.00008  | 0.00268  |
| 135 | 19 | C 1S | -0.00057 | 0.00203  | -0.00165 | -0.00004 | -0.00058 |
| 136 |    | 2S   | 0.00044  | -0.00157 | 0.00215  | 0.00006  | 0.00152  |
| 137 |    | 3S   | 0.00486  | -0.01738 | 0.02523  | 0.00059  | 0.01496  |
| 138 |    | 4PX  | 0.00216  | -0.00768 | 0.00293  | 0.00007  | -0.08477 |
| 139 |    | 4PY  | -0.00021 | 0.00075  | 0.00393  | 0.00010  | 0.14159  |
| 140 |    | 4PZ  | -0.00168 | 0.00602  | -0.01050 | -0.00027 | 0.05993  |
| 141 |    | 5PX  | -0.01815 | 0.06493  | -0.03490 | -0.00086 | -0.07188 |
| 142 |    | 5PY  | -0.00677 | 0.02421  | -0.01222 | -0.00027 | 0.10539  |

|     |    |      |          |          |          |          |          |
|-----|----|------|----------|----------|----------|----------|----------|
| 143 |    | 5PZ  | 0.00027  | -0.00089 | -0.02026 | -0.00057 | 0.02611  |
| 144 | 20 | H 1S | 0.00094  | -0.00335 | 0.00485  | 0.00013  | -0.00304 |
| 145 |    | 2S   | 0.00601  | -0.02144 | -0.00938 | -0.00028 | -0.01685 |
| 146 | 21 | C 1S | 0.00008  | -0.00022 | 0.00021  | 0.00001  | -0.00115 |
| 147 |    | 2S   | -0.00038 | 0.00106  | -0.00054 | 0.00001  | 0.00389  |
| 148 |    | 3S   | -0.00030 | 0.00200  | -0.00075 | -0.00034 | 0.00917  |
| 149 |    | 4PX  | -0.00051 | 0.00213  | -0.00093 | -0.00001 | -0.06627 |
| 150 |    | 4PY  | -0.00010 | 0.00056  | -0.00107 | -0.00002 | 0.17836  |
| 151 |    | 4PZ  | -0.00029 | 0.00082  | -0.00087 | -0.00003 | 0.06810  |
| 152 |    | 5PX  | -0.00008 | -0.00042 | -0.00420 | 0.00032  | -0.02338 |
| 153 |    | 5PY  | 0.00007  | 0.00051  | -0.00310 | 0.00000  | 0.08608  |
| 154 |    | 5PZ  | 0.00154  | -0.00460 | 0.00182  | 0.00008  | 0.03546  |
| 155 | 22 | C 1S | -0.00009 | 0.00015  | -0.00008 | 0.00000  | 0.00143  |
| 156 |    | 2S   | 0.00005  | -0.00016 | 0.00044  | 0.00003  | -0.00282 |
| 157 |    | 3S   | 0.00098  | -0.00066 | -0.00209 | -0.00012 | -0.00970 |
| 158 |    | 4PX  | 0.00012  | -0.00108 | 0.00061  | -0.00001 | 0.00828  |
| 159 |    | 4PY  | 0.00012  | -0.00067 | 0.00073  | 0.00001  | -0.02079 |
| 160 |    | 4PZ  | -0.00021 | 0.00042  | -0.00036 | -0.00002 | -0.00462 |
| 161 |    | 5PX  | -0.00013 | -0.00018 | -0.00150 | 0.00032  | -0.01888 |
| 162 |    | 5PY  | -0.00177 | 0.00038  | -0.00038 | 0.00038  | 0.08248  |
| 163 |    | 5PZ  | -0.00109 | 0.00168  | 0.00045  | -0.00009 | 0.03904  |
| 164 | 23 | H 1S | -0.00007 | 0.00004  | 0.00019  | 0.00001  | -0.02765 |
| 165 |    | 2S   | 0.00105  | -0.00046 | -0.00027 | 0.00000  | -0.09695 |
| 166 | 24 | H 1S | 0.00004  | 0.00003  | -0.00018 | 0.00001  | 0.02358  |
| 167 |    | 2S   | -0.00080 | 0.00039  | -0.00030 | 0.00012  | 0.07312  |
| 168 | 25 | C 1S | 0.00005  | -0.00006 | 0.00003  | 0.00001  | -0.00104 |
| 169 |    | 2S   | -0.00009 | -0.00002 | 0.00001  | -0.00004 | 0.00031  |
| 170 |    | 3S   | 0.00021  | 0.00170  | -0.00008 | 0.00007  | 0.01771  |
| 171 |    | 4PX  | 0.00006  | 0.00055  | -0.00021 | 0.00004  | 0.00543  |
| 172 |    | 4PY  | 0.00025  | 0.00031  | -0.00017 | 0.00013  | 0.00001  |
| 173 |    | 4PZ  | -0.00014 | 0.00022  | -0.00011 | -0.00007 | 0.00422  |
| 174 |    | 5PX  | -0.00178 | 0.00025  | -0.00139 | 0.00039  | 0.07040  |
| 175 |    | 5PY  | 0.00210  | -0.00018 | -0.00061 | 0.00008  | -0.11384 |
| 176 |    | 5PZ  | -0.00054 | 0.00006  | 0.00016  | -0.00031 | -0.02389 |
| 177 | 26 | H 1S | -0.00007 | -0.00001 | 0.00004  | -0.00001 | -0.00152 |
| 178 |    | 2S   | 0.00026  | -0.00036 | -0.00004 | -0.00037 | -0.05406 |
| 179 | 27 | H 1S | 0.00002  | 0.00005  | -0.00007 | 0.00005  | 0.00277  |
| 180 |    | 2S   | -0.00123 | -0.00005 | -0.00023 | -0.00001 | 0.06333  |
| 181 | 28 | C 1S | -0.00014 | 0.00003  | -0.00003 | 0.00000  | 0.00461  |
| 182 |    | 2S   | 0.00028  | -0.00004 | 0.00018  | 0.00001  | -0.01139 |

|     |    |      |          |          |          |          |          |
|-----|----|------|----------|----------|----------|----------|----------|
| 183 |    | 3S   | 0.00255  | -0.00007 | -0.00058 | 0.00046  | -0.03979 |
| 184 |    | 4PX  | -0.00044 | -0.00049 | 0.00024  | 0.00000  | 0.01457  |
| 185 |    | 4PY  | 0.00011  | -0.00021 | 0.00012  | -0.00013 | 0.00439  |
| 186 |    | 4PZ  | 0.00012  | 0.00016  | -0.00007 | 0.00005  | 0.01354  |
| 187 |    | 5PX  | 0.00063  | -0.00034 | -0.00088 | 0.00096  | -0.02582 |
| 188 |    | 5PY  | -0.00408 | -0.00089 | -0.00057 | -0.00022 | 0.09782  |
| 189 |    | 5PZ  | 0.00037  | 0.00017  | -0.00020 | 0.00055  | 0.04512  |
| 190 | 29 | H 1S | 0.00016  | 0.00000  | 0.00005  | -0.00001 | 0.00007  |
| 191 |    | 2S   | 0.00079  | 0.00013  | 0.00010  | -0.00033 | -0.05359 |
| 192 | 30 | H 1S | 0.00006  | 0.00000  | 0.00004  | 0.00016  | 0.00079  |
| 193 |    | 2S   | -0.00268 | -0.00038 | -0.00007 | -0.00066 | 0.06318  |
| 194 | 31 | C 1S | -0.00024 | -0.00011 | 0.00003  | -0.00010 | -0.00130 |
| 195 |    | 2S   | 0.00033  | 0.00019  | -0.00004 | 0.00043  | 0.00212  |
| 196 |    | 3S   | 0.00327  | 0.00121  | -0.00012 | -0.00071 | 0.00526  |
| 197 |    | 4PX  | -0.00007 | 0.00026  | -0.00016 | -0.00021 | -0.00449 |
| 198 |    | 4PY  | 0.00192  | 0.00063  | -0.00006 | 0.00098  | -0.00236 |
| 199 |    | 4PZ  | -0.00068 | -0.00009 | -0.00005 | -0.00047 | 0.00117  |
| 200 |    | 5PX  | -0.00146 | -0.00036 | -0.00074 | 0.00071  | 0.02947  |
| 201 |    | 5PY  | 0.00185  | 0.00048  | 0.00016  | -0.00059 | -0.03484 |
| 202 |    | 5PZ  | -0.00424 | -0.00116 | -0.00035 | 0.00011  | 0.00946  |
| 203 | 32 | H 1S | -0.00019 | -0.00004 | -0.00001 | 0.00001  | 0.00374  |
| 204 |    | 2S   | -0.00248 | -0.00073 | -0.00005 | -0.00070 | 0.00100  |
| 205 | 33 | H 1S | -0.00046 | -0.00022 | 0.00007  | -0.00016 | 0.00867  |
| 206 |    | 2S   | -0.00005 | -0.00020 | -0.00020 | -0.00035 | 0.01021  |
| 207 | 34 | C 1S | 0.00016  | 0.00004  | 0.00000  | 0.00020  | 0.00017  |
| 208 |    | 2S   | -0.00104 | -0.00028 | 0.00006  | -0.00035 | -0.00286 |
| 209 |    | 3S   | -0.00771 | -0.00213 | -0.00042 | -0.00079 | 0.02849  |
| 210 |    | 4PX  | -0.00066 | -0.00015 | -0.00001 | 0.00022  | 0.07509  |
| 211 |    | 4PY  | -0.00260 | -0.00074 | 0.00001  | -0.00094 | 0.03966  |
| 212 |    | 4PZ  | -0.00138 | -0.00037 | 0.00002  | -0.00067 | 0.01671  |
| 213 |    | 5PX  | -0.00038 | -0.00003 | -0.00029 | 0.00126  | 0.05248  |
| 214 |    | 5PY  | 0.00103  | 0.00047  | 0.00061  | -0.00272 | 0.00819  |
| 215 |    | 5PZ  | 0.00578  | 0.00148  | 0.00010  | 0.00115  | 0.00490  |
| 216 | 35 | C 1S | 0.00003  | 0.00001  | 0.00001  | -0.00034 | -0.00011 |
| 217 |    | 2S   | 0.00002  | 0.00001  | 0.00000  | 0.00037  | 0.00077  |
| 218 |    | 3S   | -0.00320 | -0.00082 | -0.00037 | 0.01144  | -0.00297 |
| 219 |    | 4PX  | 0.01044  | 0.00293  | -0.00009 | 0.00328  | -0.11658 |
| 220 |    | 4PY  | 0.00396  | 0.00110  | -0.00005 | 0.00195  | -0.04710 |
| 221 |    | 4PZ  | -0.00412 | -0.00115 | 0.00016  | -0.00626 | -0.02982 |
| 222 |    | 5PX  | -0.01127 | -0.00308 | -0.00038 | 0.00725  | -0.10844 |

|     |    |      |          |          |          |          |          |
|-----|----|------|----------|----------|----------|----------|----------|
| 223 |    | 5PY  | 0.00147  | 0.00035  | 0.00041  | -0.00165 | -0.05076 |
| 224 |    | 5PZ  | 0.07150  | 0.01994  | 0.00015  | -0.00180 | -0.02886 |
| 225 | 36 | C 1S | -0.00266 | -0.00074 | 0.00004  | -0.00143 | -0.00071 |
| 226 |    | 2S   | 0.00380  | 0.00106  | -0.00003 | 0.00178  | 0.00132  |
| 227 |    | 3S   | 0.03686  | 0.01033  | -0.00084 | 0.02698  | 0.00974  |
| 228 |    | 4PX  | 0.01644  | 0.00462  | -0.00006 | 0.00169  | 0.03227  |
| 229 |    | 4PY  | 0.02370  | 0.00664  | -0.00023 | 0.00879  | 0.01752  |
| 230 |    | 4PZ  | 0.00577  | 0.00162  | -0.00005 | 0.00187  | 0.00773  |
| 231 |    | 5PX  | -0.01128 | -0.00314 | 0.00030  | -0.01158 | 0.04133  |
| 232 |    | 5PY  | 0.06838  | 0.01910  | -0.00032 | 0.00932  | 0.02522  |
| 233 |    | 5PZ  | 0.01353  | 0.00378  | -0.00029 | 0.01614  | 0.01046  |
| 234 | 37 | H 1S | -0.00144 | -0.00040 | -0.00001 | 0.00061  | -0.00090 |
| 235 |    | 2S   | 0.00879  | 0.00246  | 0.00008  | -0.00604 | -0.00025 |
| 236 | 38 | C 1S | 0.00451  | 0.00126  | -0.00007 | 0.00259  | 0.00142  |
| 237 |    | 2S   | -0.00666 | -0.00186 | 0.00012  | -0.00454 | -0.00499 |
| 238 |    | 3S   | -0.03684 | -0.01027 | 0.00092  | -0.03287 | -0.00244 |
| 239 |    | 4PX  | 0.00740  | 0.00207  | -0.00013 | 0.00497  | 0.06859  |
| 240 |    | 4PY  | -0.01634 | -0.00457 | 0.00022  | -0.00855 | 0.02692  |
| 241 |    | 4PZ  | -0.00728 | -0.00203 | 0.00032  | -0.01233 | 0.02052  |
| 242 |    | 5PX  | -0.05656 | -0.01580 | -0.00027 | 0.00934  | 0.05032  |
| 243 |    | 5PY  | 0.08060  | 0.02252  | -0.00038 | 0.01670  | 0.02832  |
| 244 |    | 5PZ  | 0.00591  | 0.00166  | 0.00105  | -0.03995 | 0.01682  |
| 245 | 39 | H 1S | -0.00827 | -0.00231 | 0.00018  | -0.00693 | -0.00219 |
| 246 |    | 2S   | -0.02922 | -0.00817 | -0.00084 | 0.03048  | -0.00722 |
| 247 | 40 | C 1S | -0.00228 | -0.00064 | 0.00007  | -0.00271 | 0.00038  |
| 248 |    | 2S   | 0.00225  | 0.00064  | -0.00012 | 0.00490  | -0.00154 |
| 249 |    | 3S   | 0.02951  | 0.00814  | -0.00099 | 0.03730  | 0.00371  |
| 250 |    | 4PX  | -0.01683 | -0.00470 | 0.00010  | -0.00401 | 0.06869  |
| 251 |    | 4PY  | -0.00186 | -0.00052 | -0.00022 | 0.00841  | 0.03238  |
| 252 |    | 4PZ  | -0.01601 | -0.00447 | 0.00047  | -0.01844 | 0.01462  |
| 253 |    | 5PX  | 0.05243  | 0.01465  | -0.00061 | 0.02353  | 0.05598  |
| 254 |    | 5PY  | -0.07965 | -0.02223 | 0.00050  | -0.01775 | 0.00601  |
| 255 |    | 5PZ  | 0.02403  | 0.00675  | 0.00036  | -0.01680 | 0.00364  |
| 256 | 41 | H 1S | 0.00237  | 0.00066  | -0.00019 | 0.00749  | -0.00100 |
| 257 |    | 2S   | 0.04251  | 0.01190  | 0.00032  | -0.01470 | -0.00154 |
| 258 | 42 | C 1S | 0.00030  | 0.00008  | -0.00003 | 0.00119  | -0.00017 |
| 259 |    | 2S   | 0.00073  | 0.00020  | 0.00001  | -0.00042 | 0.00131  |
| 260 |    | 3S   | -0.02235 | -0.00623 | 0.00087  | -0.03425 | -0.01038 |
| 261 |    | 4PX  | -0.01303 | -0.00361 | 0.00001  | -0.00081 | 0.04185  |
| 262 |    | 4PY  | -0.00519 | -0.00144 | 0.00013  | -0.00529 | 0.01987  |



|     |    |       |          |          |          |          |          |
|-----|----|-------|----------|----------|----------|----------|----------|
| 263 |    | 4PZ   | -0.00251 | -0.00069 | -0.00003 | 0.00081  | 0.01106  |
| 264 |    | 5PX   | 0.00382  | 0.00100  | 0.00012  | -0.00446 | 0.05008  |
| 265 |    | 5PY   | -0.06321 | -0.01754 | 0.00032  | -0.01333 | 0.01742  |
| 266 |    | 5PZ   | 0.00131  | 0.00038  | -0.00002 | 0.00013  | 0.01679  |
| 267 | 43 | H 1S  | -0.00199 | -0.00056 | 0.00005  | -0.00180 | -0.00044 |
| 268 |    | 2S    | -0.00934 | -0.00259 | 0.00001  | -0.00087 | -0.00103 |
| 269 | 44 | Zn 1S | -0.00326 | -0.00091 | 0.00005  | -0.00178 | -0.00347 |
| 270 |    | 2S    | -0.01608 | -0.00450 | 0.00024  | -0.00909 | 0.00789  |
| 271 |    | 3PX   | 0.00246  | 0.00069  | 0.00033  | -0.01266 | -0.02269 |
| 272 |    | 3PY   | 0.02543  | 0.00711  | -0.00030 | 0.01148  | 0.01041  |
| 273 |    | 3PZ   | 0.00020  | 0.00006  | 0.00060  | -0.02328 | 0.00621  |
| 274 |    | 4PX   | -0.00663 | -0.00186 | 0.00025  | -0.00952 | 0.00394  |
| 275 |    | 4PY   | 0.02524  | 0.00705  | -0.00018 | 0.00766  | -0.00128 |
| 276 |    | 4PZ   | -0.01455 | -0.00406 | -0.00224 | 0.08748  | 0.00033  |
| 277 |    | 5D 0  | 0.00460  | 0.00129  | -0.00041 | 0.01606  | 0.00546  |
| 278 |    | 5D+1  | 0.01398  | 0.00391  | 0.00208  | -0.08129 | -0.00823 |
| 279 |    | 5D-1  | 0.06958  | 0.01944  | -0.00036 | 0.01392  | -0.00356 |
| 280 |    | 5D+2  | 0.00381  | 0.00107  | 0.00015  | -0.00591 | 0.03048  |
| 281 |    | 5D-2  | 0.02052  | 0.00573  | -0.00001 | 0.00031  | -0.00463 |
| 282 |    | 6D 0  | 0.00097  | 0.00027  | -0.00008 | 0.00295  | 0.00050  |
| 283 |    | 6D+1  | 0.00213  | 0.00060  | 0.00032  | -0.01257 | -0.00133 |
| 284 |    | 6D-1  | 0.01110  | 0.00310  | -0.00006 | 0.00218  | -0.00055 |
| 285 |    | 6D+2  | 0.00159  | 0.00044  | 0.00001  | -0.00050 | 0.00443  |
| 286 |    | 6D-2  | 0.00435  | 0.00121  | -0.00001 | 0.00039  | -0.00004 |
| 287 | 45 | Cl 1S | -0.00117 | -0.00033 | -0.00020 | 0.00791  | -0.00111 |
| 288 |    | 2S    | -0.00249 | -0.00069 | -0.00048 | 0.01896  | -0.00334 |
| 289 |    | 3PX   | 0.03340  | 0.00933  | 0.00641  | -0.24991 | 0.00198  |
| 290 |    | 3PY   | 0.41850  | 0.11696  | -0.00205 | 0.07962  | -0.00057 |
| 291 |    | 3PZ   | -0.03359 | -0.00939 | -0.00797 | 0.31096  | -0.00584 |
| 292 |    | 4PX   | 0.03859  | 0.01078  | 0.00728  | -0.28373 | 0.00189  |
| 293 |    | 4PY   | 0.47035  | 0.13145  | -0.00227 | 0.08814  | -0.00249 |
| 294 |    | 4PZ   | -0.03440 | -0.00962 | -0.00871 | 0.33986  | -0.00937 |
| 295 | 46 | Cl 1S | -0.00018 | -0.00005 | 0.00019  | -0.00729 | -0.00284 |
| 296 |    | 2S    | 0.00320  | 0.00090  | 0.00060  | -0.02338 | -0.00757 |
| 297 |    | 3PX   | -0.07289 | -0.02037 | -0.00513 | 0.19997  | -0.00241 |
| 298 |    | 3PY   | -0.23878 | -0.06673 | 0.00008  | -0.00326 | -0.00364 |
| 299 |    | 3PZ   | -0.00623 | -0.00173 | -0.00647 | 0.25229  | 0.01150  |
| 300 |    | 4PX   | -0.08377 | -0.02340 | -0.00585 | 0.22814  | -0.00357 |
| 301 |    | 4PY   | -0.27666 | -0.07732 | 0.00018  | -0.00710 | -0.00275 |
| 302 |    | 4PZ   | -0.00701 | -0.00195 | -0.00704 | 0.27433  | 0.01700  |

|     |    |   |     |          |          |          |          |          |
|-----|----|---|-----|----------|----------|----------|----------|----------|
| 303 | 47 | O | 1S  | 0.00005  | 0.00001  | 0.00000  | -0.00001 | -0.00020 |
| 304 |    |   | 2S  | -0.00024 | -0.00005 | 0.00001  | 0.00009  | 0.00031  |
| 305 |    |   | 3S  | 0.00133  | 0.00035  | -0.00002 | -0.00071 | 0.00258  |
| 306 |    |   | 4PX | -0.00062 | -0.00020 | -0.00001 | 0.00074  | -0.05298 |
| 307 |    |   | 4PY | -0.00130 | -0.00038 | -0.00004 | 0.00124  | 0.14147  |
| 308 |    |   | 4PZ | -0.00047 | -0.00013 | -0.00001 | 0.00036  | 0.04934  |
| 309 |    |   | 5PX | 0.00139  | 0.00043  | -0.00002 | 0.00012  | -0.03829 |
| 310 |    |   | 5PY | 0.00019  | -0.00002 | -0.00002 | 0.00082  | 0.11029  |
| 311 |    |   | 5PZ | -0.00034 | -0.00014 | 0.00002  | 0.00040  | 0.03860  |
| 312 | 48 | O | 1S  | -0.00001 | 0.00005  | 0.00004  | 0.00000  | -0.00028 |
| 313 |    |   | 2S  | -0.00005 | 0.00013  | -0.00005 | 0.00001  | 0.00146  |
| 314 |    |   | 3S  | 0.00082  | -0.00259 | -0.00068 | -0.00008 | -0.00330 |
| 315 |    |   | 4PX | -0.00126 | 0.00431  | 0.00011  | 0.00005  | 0.05978  |
| 316 |    |   | 4PY | -0.00168 | 0.00594  | 0.00234  | 0.00009  | 0.03079  |
| 317 |    |   | 4PZ | -0.00057 | 0.00200  | 0.00082  | 0.00003  | 0.01273  |
| 318 |    |   | 5PX | -0.00102 | 0.00355  | 0.00025  | 0.00006  | 0.04755  |
| 319 |    |   | 5PY | -0.00015 | 0.00042  | 0.00103  | -0.00005 | 0.02251  |
| 320 |    |   | 5PZ | -0.00040 | 0.00140  | 0.00061  | 0.00004  | 0.01160  |
| 321 | 49 | N | 1S  | 0.00123  | 0.00034  | 0.00001  | -0.00026 | -0.00265 |
| 322 |    |   | 2S  | -0.00276 | -0.00077 | -0.00003 | 0.00110  | 0.00786  |
| 323 |    |   | 3S  | -0.00522 | -0.00144 | 0.00005  | -0.00264 | 0.01309  |
| 324 |    |   | 4PX | 0.00321  | 0.00088  | -0.00013 | 0.00504  | -0.12784 |
| 325 |    |   | 4PY | 0.00536  | 0.00151  | 0.00024  | -0.00949 | 0.19339  |
| 326 |    |   | 4PZ | 0.00212  | 0.00060  | 0.00008  | -0.00306 | 0.08892  |
| 327 |    |   | 5PX | 0.02146  | 0.00599  | -0.00009 | 0.00273  | -0.11174 |
| 328 |    |   | 5PY | -0.00509 | -0.00141 | 0.00022  | -0.00904 | 0.18247  |
| 329 |    |   | 5PZ | 0.02169  | 0.00608  | 0.00045  | -0.01781 | 0.08296  |
| 330 | 50 | N | 1S  | -0.00037 | -0.00009 | 0.00000  | 0.00008  | 0.00071  |
| 331 |    |   | 2S  | 0.00048  | 0.00009  | 0.00000  | -0.00003 | -0.00237 |
| 332 |    |   | 3S  | 0.00178  | 0.00056  | -0.00003 | -0.00127 | 0.00018  |
| 333 |    |   | 4PX | -0.00255 | -0.00078 | -0.00006 | 0.00186  | 0.01863  |
| 334 |    |   | 4PY | 0.00037  | 0.00013  | 0.00003  | -0.00152 | -0.03363 |
| 335 |    |   | 4PZ | -0.00022 | -0.00007 | 0.00000  | -0.00024 | -0.01682 |
| 336 |    |   | 5PX | -0.00490 | -0.00145 | 0.00015  | 0.00148  | 0.01419  |
| 337 |    |   | 5PY | -0.00597 | -0.00166 | 0.00010  | -0.00057 | -0.06611 |
| 338 |    |   | 5PZ | 0.01218  | 0.00341  | 0.00007  | -0.00230 | -0.02563 |
| 339 | 51 | H | 1S  | 0.00078  | 0.00021  | 0.00001  | -0.00070 | 0.00007  |
| 340 |    |   | 2S  | 0.01314  | 0.00357  | 0.00012  | -0.00336 | 0.00200  |
| 341 | 52 | N | 1S  | -0.00007 | 0.00026  | -0.00011 | 0.00000  | -0.00036 |
| 342 |    |   | 2S  | 0.00026  | -0.00093 | -0.00019 | 0.00000  | 0.00105  |

|     |    |      |          |          |          |          |          |
|-----|----|------|----------|----------|----------|----------|----------|
| 343 |    | 3S   | -0.00119 | 0.00424  | 0.00402  | 0.00004  | 0.00316  |
| 344 |    | 4PX  | 0.00263  | -0.00961 | -0.00195 | -0.00002 | -0.01655 |
| 345 |    | 4PY  | 0.00056  | -0.00206 | -0.00070 | -0.00001 | -0.00695 |
| 346 |    | 4PZ  | 0.00006  | -0.00026 | 0.00069  | 0.00002  | -0.00413 |
| 347 |    | 5PX  | 0.00129  | -0.00486 | -0.00152 | -0.00009 | -0.02060 |
| 348 |    | 5PY  | -0.00119 | 0.00382  | -0.00171 | 0.00007  | -0.01182 |
| 349 |    | 5PZ  | 0.00532  | -0.01878 | 0.00060  | 0.00011  | -0.00494 |
| 350 | 53 | H 1S | 0.00032  | -0.00114 | -0.00098 | -0.00002 | 0.00114  |
| 351 |    | 2S   | 0.00436  | -0.01516 | -0.00196 | 0.00005  | 0.00183  |
| 352 | 54 | N 1S | -0.00151 | 0.00540  | 0.00175  | 0.00004  | -0.00365 |
| 353 |    | 2S   | 0.00333  | -0.01191 | -0.00374 | -0.00009 | 0.00842  |
| 354 |    | 3S   | 0.00717  | -0.02567 | -0.00691 | -0.00019 | 0.02304  |
| 355 |    | 4PX  | 0.00697  | -0.02504 | -0.01196 | -0.00029 | 0.09971  |
| 356 |    | 4PY  | -0.00496 | 0.01770  | 0.00321  | 0.00009  | 0.02584  |
| 357 |    | 4PZ  | 0.00195  | -0.00702 | -0.00087 | -0.00002 | 0.02430  |
| 358 |    | 5PX  | 0.00252  | -0.00911 | -0.01464 | -0.00035 | 0.09252  |
| 359 |    | 5PY  | -0.00773 | 0.02765  | 0.01231  | 0.00030  | 0.03215  |
| 360 |    | 5PZ  | 0.00853  | -0.03055 | -0.01168 | -0.00032 | 0.02530  |
| 361 | 55 | C 1S | 0.00539  | 0.00150  | 0.00008  | -0.00316 | -0.00025 |
| 362 |    | 2S   | -0.00724 | -0.00203 | -0.00016 | 0.00627  | 0.00044  |
| 363 |    | 3S   | -0.07146 | -0.01988 | -0.00079 | 0.02912  | 0.01252  |
| 364 |    | 4PX  | 0.02289  | 0.00641  | 0.00030  | -0.01169 | 0.08181  |
| 365 |    | 4PY  | 0.00371  | 0.00104  | 0.00016  | -0.00623 | -0.13566 |
| 366 |    | 4PZ  | 0.01749  | 0.00489  | 0.00041  | -0.01591 | -0.06205 |
| 367 |    | 5PX  | -0.07782 | -0.02175 | -0.00016 | 0.00830  | 0.05009  |
| 368 |    | 5PY  | -0.04512 | -0.01261 | -0.00064 | 0.02575  | -0.09950 |
| 369 |    | 5PZ  | 0.02215  | 0.00616  | 0.00048  | -0.01723 | -0.04868 |
| 370 | 56 | H 1S | -0.00943 | -0.00264 | -0.00019 | 0.00729  | -0.00339 |
| 371 |    | 2S   | 0.00057  | 0.00012  | 0.00040  | -0.01348 | -0.01289 |
| 372 | 57 | C 1S | -0.00242 | -0.00067 | -0.00003 | 0.00130  | -0.00063 |
| 373 |    | 2S   | 0.00133  | 0.00037  | 0.00003  | -0.00161 | 0.00195  |
| 374 |    | 3S   | 0.06209  | 0.01726  | 0.00078  | -0.02729 | 0.00594  |
| 375 |    | 4PX  | -0.00655 | -0.00184 | -0.00019 | 0.00719  | 0.04353  |
| 376 |    | 4PY  | -0.01281 | -0.00360 | -0.00002 | 0.00093  | -0.08716 |
| 377 |    | 4PZ  | -0.00254 | -0.00073 | 0.00003  | -0.00134 | -0.03581 |
| 378 |    | 5PX  | -0.04410 | -0.01228 | -0.00040 | 0.01467  | 0.06386  |
| 379 |    | 5PY  | -0.03192 | -0.00885 | 0.00009  | -0.00543 | -0.10874 |
| 380 |    | 5PZ  | -0.00236 | -0.00070 | 0.00012  | -0.00189 | -0.04696 |
| 381 | 58 | H 1S | 0.00114  | 0.00032  | 0.00003  | -0.00116 | -0.00356 |
| 382 |    | 2S   | 0.00692  | 0.00189  | 0.00006  | -0.00020 | -0.00740 |

|     |    |   |     |          |          |          |          |          |
|-----|----|---|-----|----------|----------|----------|----------|----------|
| 383 | 59 | C | 1S  | 0.00110  | 0.00030  | 0.00001  | -0.00043 | 0.00055  |
| 384 |    |   | 2S  | -0.00165 | -0.00045 | -0.00001 | 0.00017  | -0.00002 |
| 385 |    |   | 3S  | -0.02468 | -0.00693 | -0.00013 | 0.01121  | -0.03098 |
| 386 |    |   | 4PX | 0.00515  | 0.00147  | 0.00011  | -0.00403 | -0.12844 |
| 387 |    |   | 4PY | -0.00174 | -0.00046 | -0.00010 | 0.00397  | 0.25279  |
| 388 |    |   | 4PZ | 0.00650  | 0.00182  | 0.00011  | -0.00434 | 0.10029  |
| 389 |    |   | 5PX | -0.01779 | -0.00507 | 0.00039  | -0.00275 | -0.13630 |
| 390 |    |   | 5PY | 0.00508  | 0.00131  | 0.00005  | 0.00451  | 0.24055  |
| 391 |    |   | 5PZ | -0.04129 | -0.01159 | -0.00008 | 0.00312  | 0.09827  |
| 392 | 60 | C | 1S  | 0.00120  | 0.00033  | 0.00003  | -0.00109 | -0.00070 |
| 393 |    |   | 2S  | -0.00106 | -0.00030 | 0.00000  | -0.00009 | 0.00248  |
| 394 |    |   | 3S  | -0.02788 | -0.00777 | -0.00092 | 0.03513  | -0.00465 |
| 395 |    |   | 4PX | 0.00159  | 0.00045  | 0.00015  | -0.00613 | 0.04711  |
| 396 |    |   | 4PY | 0.00882  | 0.00245  | -0.00007 | 0.00286  | -0.08644 |
| 397 |    |   | 4PZ | 0.00182  | 0.00050  | -0.00008 | 0.00298  | -0.03327 |
| 398 |    |   | 5PX | 0.02870  | 0.00804  | 0.00030  | -0.01192 | 0.05672  |
| 399 |    |   | 5PY | 0.03878  | 0.01084  | 0.00033  | -0.01253 | -0.09128 |
| 400 |    |   | 5PZ | -0.02485 | -0.00695 | -0.00042 | 0.01549  | -0.05480 |
| 401 | 61 | H | 1S  | 0.00011  | 0.00003  | -0.00002 | 0.00070  | -0.00284 |
| 402 |    |   | 2S  | 0.00388  | 0.00106  | 0.00013  | -0.00420 | 0.00273  |
| 403 | 62 | C | 1S  | -0.00203 | -0.00057 | -0.00004 | 0.00165  | -0.00059 |
| 404 |    |   | 2S  | 0.00156  | 0.00044  | 0.00005  | -0.00215 | 0.00154  |
| 405 |    |   | 3S  | 0.01738  | 0.00485  | 0.00071  | -0.02523 | 0.01510  |
| 406 |    |   | 4PX | -0.00768 | -0.00214 | -0.00008 | 0.00292  | 0.08586  |
| 407 |    |   | 4PY | 0.00076  | 0.00021  | -0.00010 | 0.00393  | -0.14343 |
| 408 |    |   | 4PZ | 0.00604  | 0.00169  | 0.00027  | -0.01051 | -0.06071 |
| 409 |    |   | 5PX | 0.06495  | 0.01815  | 0.00093  | -0.03490 | 0.07276  |
| 410 |    |   | 5PY | 0.02424  | 0.00677  | 0.00035  | -0.01221 | -0.10680 |
| 411 |    |   | 5PZ | -0.00094 | -0.00024 | 0.00047  | -0.02025 | -0.02646 |
| 412 | 63 | H | 1S  | 0.00335  | 0.00093  | 0.00012  | -0.00485 | -0.00308 |
| 413 |    |   | 2S  | 0.02147  | 0.00598  | -0.00020 | 0.00938  | -0.01708 |
| 414 | 64 | C | 1S  | 0.00023  | 0.00005  | 0.00000  | -0.00021 | -0.00116 |
| 415 |    |   | 2S  | -0.00111 | -0.00022 | -0.00004 | 0.00054  | 0.00392  |
| 416 |    |   | 3S  | -0.00187 | -0.00078 | 0.00030  | 0.00077  | 0.00922  |
| 417 |    |   | 4PX | 0.00208  | 0.00067  | 0.00004  | -0.00093 | 0.06712  |
| 418 |    |   | 4PY | 0.00054  | 0.00021  | 0.00004  | -0.00107 | -0.18079 |
| 419 |    |   | 4PZ | 0.00086  | 0.00018  | 0.00002  | -0.00087 | -0.06900 |
| 420 |    |   | 5PX | -0.00031 | -0.00029 | 0.00054  | -0.00418 | 0.02363  |
| 421 |    |   | 5PY | 0.00040  | 0.00033  | 0.00016  | -0.00309 | -0.08731 |
| 422 |    |   | 5PZ | -0.00473 | -0.00107 | -0.00002 | 0.00182  | -0.03600 |

|     |    |   |     |          |          |          |          |          |
|-----|----|---|-----|----------|----------|----------|----------|----------|
| 423 | 65 | C | 1S  | -0.00017 | 0.00000  | 0.00000  | 0.00008  | 0.00143  |
| 424 |    |   | 2S  | 0.00016  | 0.00004  | -0.00001 | -0.00044 | -0.00283 |
| 425 |    |   | 3S  | 0.00108  | -0.00049 | 0.00001  | 0.00209  | -0.00943 |
| 426 |    |   | 4PX | -0.00098 | -0.00046 | -0.00004 | 0.00061  | -0.00836 |
| 427 |    |   | 4PY | -0.00064 | -0.00024 | -0.00002 | 0.00073  | 0.02110  |
| 428 |    |   | 4PZ | 0.00047  | 0.00004  | 0.00000  | -0.00036 | 0.00469  |
| 429 |    |   | 5PX | -0.00009 | -0.00021 | 0.00040  | -0.00148 | 0.01913  |
| 430 |    |   | 5PY | 0.00125  | -0.00132 | 0.00039  | -0.00036 | -0.08328 |
| 431 |    |   | 5PZ | 0.00201  | -0.00006 | -0.00011 | 0.00044  | -0.03942 |
| 432 | 66 | H | 1S  | -0.00007 | 0.00004  | 0.00000  | -0.00019 | -0.02803 |
| 433 |    |   | 2S  | 0.00094  | -0.00066 | -0.00002 | 0.00027  | -0.09813 |
| 434 | 67 | H | 1S  | 0.00000  | -0.00005 | -0.00002 | 0.00018  | 0.02392  |
| 435 |    |   | 2S  | -0.00075 | 0.00048  | -0.00014 | 0.00029  | 0.07395  |
| 436 | 68 | C | 1S  | 0.00007  | -0.00001 | -0.00001 | -0.00003 | -0.00106 |
| 437 |    |   | 2S  | -0.00003 | 0.00009  | 0.00004  | -0.00001 | 0.00034  |
| 438 |    |   | 3S  | -0.00134 | -0.00106 | -0.00007 | 0.00008  | 0.01796  |
| 439 |    |   | 4PX | 0.00044  | 0.00033  | 0.00005  | -0.00021 | -0.00549 |
| 440 |    |   | 4PY | 0.00014  | 0.00037  | 0.00014  | -0.00016 | -0.00008 |
| 441 |    |   | 4PZ | 0.00026  | 0.00000  | -0.00007 | -0.00011 | -0.00427 |
| 442 |    |   | 5PX | 0.00114  | -0.00140 | 0.00046  | -0.00137 | -0.07097 |
| 443 |    |   | 5PY | -0.00125 | 0.00170  | 0.00011  | -0.00060 | 0.11471  |
| 444 |    |   | 5PZ | 0.00033  | -0.00043 | -0.00032 | 0.00015  | 0.02438  |
| 445 | 69 | H | 1S  | -0.00003 | 0.00006  | 0.00001  | -0.00004 | -0.00157 |
| 446 |    |   | 2S  | 0.00044  | -0.00003 | 0.00037  | 0.00006  | -0.05472 |
| 447 | 70 | H | 1S  | -0.00003 | -0.00005 | -0.00006 | 0.00006  | 0.00281  |
| 448 |    |   | 2S  | -0.00059 | 0.00108  | 0.00000  | 0.00023  | 0.06381  |
| 449 | 71 | C | 1S  | -0.00010 | 0.00011  | 0.00000  | 0.00003  | 0.00457  |
| 450 |    |   | 2S  | 0.00017  | -0.00022 | 0.00000  | -0.00018 | -0.01132 |
| 451 |    |   | 3S  | 0.00139  | -0.00215 | -0.00049 | 0.00055  | -0.03932 |
| 452 |    |   | 4PX | -0.00019 | -0.00063 | -0.00001 | 0.00024  | -0.01437 |
| 453 |    |   | 4PY | -0.00024 | -0.00002 | -0.00014 | 0.00012  | -0.00445 |
| 454 |    |   | 4PZ | 0.00007  | 0.00018  | 0.00005  | -0.00006 | -0.01350 |
| 455 |    |   | 5PX | -0.00062 | 0.00037  | 0.00100  | -0.00083 | 0.02599  |
| 456 |    |   | 5PY | 0.00136  | -0.00396 | -0.00019 | -0.00058 | -0.09817 |
| 457 |    |   | 5PZ | -0.00004 | 0.00041  | 0.00056  | -0.00018 | -0.04531 |
| 458 | 72 | H | 1S  | 0.00008  | -0.00014 | 0.00001  | -0.00005 | 0.00011  |
| 459 |    |   | 2S  | 0.00030  | -0.00075 | 0.00034  | -0.00009 | -0.05390 |
| 460 | 73 | H | 1S  | 0.00004  | -0.00005 | -0.00015 | -0.00005 | 0.00072  |
| 461 |    |   | 2S  | -0.00107 | 0.00249  | 0.00066  | 0.00011  | 0.06319  |
| 462 | 74 | C | 1S  | -0.00003 | 0.00026  | 0.00010  | -0.00003 | -0.00130 |

|     |    |      |          |          |          |          |          |
|-----|----|------|----------|----------|----------|----------|----------|
| 463 |    | 2S   | 0.00001  | -0.00038 | -0.00043 | 0.00002  | 0.00211  |
| 464 |    | 3S   | 0.00066  | -0.00343 | 0.00070  | 0.00016  | 0.00538  |
| 465 |    | 4PX  | 0.00026  | 0.00008  | -0.00020 | -0.00017 | 0.00440  |
| 466 |    | 4PY  | -0.00046 | 0.00197  | 0.00098  | -0.00001 | 0.00234  |
| 467 |    | 4PZ  | 0.00028  | -0.00063 | -0.00047 | -0.00008 | -0.00117 |
| 468 |    | 5PX  | 0.00045  | -0.00144 | 0.00074  | -0.00070 | -0.02936 |
| 469 |    | 5PY  | -0.00055 | 0.00184  | -0.00060 | 0.00013  | 0.03483  |
| 470 |    | 5PZ  | 0.00121  | -0.00423 | 0.00012  | -0.00035 | -0.00941 |
| 471 | 75 | H 1S | -0.00006 | 0.00019  | -0.00001 | 0.00001  | 0.00374  |
| 472 |    | 2S   | -0.00066 | 0.00250  | 0.00070  | 0.00009  | 0.00099  |
| 473 | 76 | H 1S | -0.00005 | 0.00051  | 0.00016  | -0.00006 | 0.00858  |
| 474 |    | 2S   | 0.00015  | 0.00014  | 0.00034  | 0.00022  | 0.01004  |
| 475 | 77 | C 1S | 0.00005  | -0.00015 | -0.00020 | -0.00001 | 0.00017  |
| 476 |    | 2S   | -0.00030 | 0.00103  | 0.00035  | -0.00005 | -0.00287 |
| 477 |    | 3S   | -0.00218 | 0.00770  | 0.00077  | 0.00046  | 0.02859  |
| 478 |    | 4PX  | 0.00021  | -0.00065 | 0.00022  | 0.00000  | -0.07443 |
| 479 |    | 4PY  | 0.00072  | -0.00261 | -0.00094 | -0.00004 | -0.03935 |
| 480 |    | 4PZ  | 0.00040  | -0.00137 | -0.00067 | -0.00002 | -0.01656 |
| 481 |    | 5PX  | 0.00018  | -0.00034 | 0.00127  | -0.00022 | -0.05213 |
| 482 |    | 5PY  | -0.00013 | 0.00112  | -0.00275 | 0.00047  | -0.00819 |
| 483 |    | 5PZ  | -0.00173 | 0.00571  | 0.00114  | 0.00015  | -0.00487 |
| 484 | 78 | C 1S | 0.00001  | -0.00003 | 0.00034  | 0.00001  | -0.00011 |
| 485 |    | 2S   | 0.00000  | -0.00002 | -0.00037 | -0.00001 | 0.00076  |
| 486 |    | 3S   | -0.00095 | 0.00313  | -0.01148 | -0.00022 | -0.00302 |
| 487 |    | 4PX  | -0.00291 | 0.01046  | 0.00328  | 0.00008  | 0.11547  |
| 488 |    | 4PY  | -0.00111 | 0.00397  | 0.00195  | 0.00005  | 0.04664  |
| 489 |    | 4PZ  | 0.00115  | -0.00411 | -0.00626 | -0.00017 | 0.02954  |
| 490 |    | 5PX  | 0.00321  | -0.01122 | 0.00726  | -0.00001 | 0.10731  |
| 491 |    | 5PY  | -0.00046 | 0.00144  | -0.00168 | 0.00032  | 0.05025  |
| 492 |    | 5PZ  | -0.02002 | 0.07147  | -0.00180 | 0.00006  | 0.02877  |
| 493 | 79 | C 1S | -0.00074 | 0.00266  | 0.00143  | 0.00003  | -0.00070 |
| 494 |    | 2S   | 0.00106  | -0.00380 | -0.00178 | -0.00006 | 0.00130  |
| 495 |    | 3S   | 0.01027  | -0.03685 | -0.02698 | -0.00054 | 0.00975  |
| 496 |    | 4PX  | -0.00457 | 0.01646  | 0.00170  | 0.00003  | -0.03200 |
| 497 |    | 4PY  | -0.00661 | 0.02371  | 0.00880  | 0.00022  | -0.01735 |
| 498 |    | 4PZ  | -0.00160 | 0.00577  | 0.00187  | 0.00005  | -0.00766 |
| 499 |    | 5PX  | 0.00317  | -0.01128 | -0.01158 | -0.00030 | -0.04098 |
| 500 |    | 5PY  | -0.01912 | 0.06836  | 0.00934  | 0.00016  | -0.02493 |
| 501 |    | 5PZ  | -0.00379 | 0.01355  | 0.01614  | 0.00054  | -0.01031 |
| 502 | 80 | H 1S | -0.00040 | 0.00145  | -0.00061 | -0.00002 | -0.00089 |

|     |    |      |          |          |          |          |          |
|-----|----|------|----------|----------|----------|----------|----------|
| 503 |    | 2S   | 0.00245  | -0.00877 | 0.00604  | 0.00023  | -0.00023 |
| 504 | 81 | C 1S | 0.00126  | -0.00451 | -0.00259 | -0.00007 | 0.00140  |
| 505 |    | 2S   | -0.00186 | 0.00665  | 0.00454  | 0.00011  | -0.00493 |
| 506 |    | 3S   | -0.01030 | 0.03677  | 0.03287  | 0.00077  | -0.00241 |
| 507 |    | 4PX  | -0.00206 | 0.00738  | 0.00497  | 0.00013  | -0.06790 |
| 508 |    | 4PY  | 0.00457  | -0.01634 | -0.00855 | -0.00022 | -0.02666 |
| 509 |    | 4PZ  | 0.00203  | -0.00725 | -0.01232 | -0.00032 | -0.02030 |
| 510 |    | 5PX  | 0.01581  | -0.05654 | 0.00934  | 0.00021  | -0.04981 |
| 511 |    | 5PY  | -0.02253 | 0.08057  | 0.01669  | 0.00048  | -0.02800 |
| 512 |    | 5PZ  | -0.00164 | 0.00591  | -0.03996 | -0.00100 | -0.01667 |
| 513 | 82 | H 1S | -0.00231 | 0.00826  | 0.00693  | 0.00018  | -0.00216 |
| 514 |    | 2S   | -0.00817 | 0.02924  | -0.03048 | -0.00072 | -0.00713 |
| 515 | 83 | C 1S | -0.00064 | 0.00227  | 0.00271  | 0.00007  | 0.00038  |
| 516 |    | 2S   | 0.00062  | -0.00225 | -0.00490 | -0.00013 | -0.00152 |
| 517 |    | 3S   | 0.00834  | -0.02944 | -0.03731 | -0.00093 | 0.00360  |
| 518 |    | 4PX  | 0.00471  | -0.01683 | -0.00402 | -0.00011 | -0.06802 |
| 519 |    | 4PY  | 0.00053  | -0.00187 | 0.00841  | 0.00021  | -0.03206 |
| 520 |    | 4PZ  | 0.00448  | -0.01602 | -0.01845 | -0.00048 | -0.01449 |
| 521 |    | 5PX  | -0.01465 | 0.05241  | 0.02354  | 0.00059  | -0.05542 |
| 522 |    | 5PY  | 0.02228  | -0.07963 | -0.01776 | -0.00041 | -0.00605 |
| 523 |    | 5PZ  | -0.00670 | 0.02409  | -0.01676 | -0.00050 | -0.00365 |
| 524 | 84 | H 1S | 0.00066  | -0.00236 | -0.00749 | -0.00020 | -0.00099 |
| 525 |    | 2S   | 0.01187  | -0.04253 | 0.01469  | 0.00043  | -0.00153 |
| 526 | 85 | C 1S | 0.00008  | -0.00029 | -0.00119 | -0.00003 | -0.00017 |
| 527 |    | 2S   | 0.00021  | -0.00073 | 0.00042  | 0.00001  | 0.00130  |
| 528 |    | 3S   | -0.00626 | 0.02233  | 0.03425  | 0.00089  | -0.01031 |
| 529 |    | 4PX  | 0.00366  | -0.01301 | -0.00081 | -0.00003 | -0.04147 |
| 530 |    | 4PY  | 0.00146  | -0.00517 | -0.00529 | -0.00014 | -0.01968 |
| 531 |    | 4PZ  | 0.00071  | -0.00250 | 0.00081  | 0.00001  | -0.01096 |
| 532 |    | 5PX  | -0.00112 | 0.00379  | -0.00446 | -0.00011 | -0.04953 |
| 533 |    | 5PY  | 0.01776  | -0.06312 | -0.01333 | -0.00037 | -0.01736 |
| 534 |    | 5PZ  | -0.00035 | 0.00129  | 0.00010  | -0.00002 | -0.01661 |
| 535 | 86 | H 1S | -0.00056 | 0.00199  | 0.00180  | 0.00005  | -0.00043 |
| 536 |    | 2S   | -0.00263 | 0.00933  | 0.00088  | 0.00004  | -0.00100 |

HOMO (#184) and LUMO(#185) for 5:

|                | 181      | 182      | 183      | 184      | 185      |
|----------------|----------|----------|----------|----------|----------|
|                | (A)--O   | (A)--O   | (A)--O   | (A)--O   | (A)--V   |
| EIGENVALUES -- | -0.22770 | -0.22770 | -0.22183 | -0.22183 | -0.08436 |
| 1 1 Zn 1S      | 0.00290  | 0.00079  | 0.00103  | 0.00003  | 0.00480  |

|      |       |          |          |          |          |          |
|------|-------|----------|----------|----------|----------|----------|
| 2    | 2S    | 0.01052  | 0.00288  | 0.00673  | 0.00016  | -0.00656 |
| 3    | 3PX   | 0.00127  | 0.00035  | -0.00958 | -0.00024 | -0.02525 |
| 4    | 3PY   | 0.02018  | 0.00553  | 0.00853  | 0.00021  | 0.01457  |
| 5    | 3PZ   | 0.00149  | 0.00041  | -0.03957 | -0.00097 | 0.00816  |
| 6    | 4PX   | -0.00756 | -0.00207 | -0.00339 | -0.00008 | 0.00503  |
| 7    | 4PY   | 0.01747  | 0.00478  | 0.00681  | 0.00019  | 0.00062  |
| 8    | 4PZ   | -0.01137 | -0.00311 | 0.08341  | 0.00206  | -0.00146 |
| 9    | 5D 0  | -0.00109 | -0.00030 | -0.01122 | -0.00028 | -0.00514 |
| 10   | 5D+1  | -0.00514 | -0.00141 | 0.07042  | 0.00174  | 0.00994  |
| 11   | 5D-1  | -0.06156 | -0.01684 | -0.00483 | -0.00012 | 0.00344  |
| 12   | 5D+2  | 0.00162  | 0.00044  | 0.00488  | 0.00012  | -0.02823 |
| 13   | 5D-2  | -0.01620 | -0.00443 | 0.00285  | 0.00007  | -0.00342 |
| 14   | 6D 0  | -0.00033 | -0.00009 | -0.00168 | -0.00004 | -0.00031 |
| 15   | 6D+1  | -0.00048 | -0.00013 | 0.00805  | 0.00020  | 0.00144  |
| 16   | 6D-1  | -0.00813 | -0.00222 | -0.00062 | -0.00002 | 0.00053  |
| 17   | 6D+2  | -0.00050 | -0.00014 | 0.00033  | 0.00001  | -0.00364 |
| 18   | 6D-2  | -0.00314 | -0.00086 | -0.00013 | 0.00000  | -0.00124 |
| 19 2 | Br 1S | 0.00060  | 0.00017  | -0.00505 | -0.00013 | 0.00029  |
| 20   | 2S    | 0.00274  | 0.00075  | -0.02362 | -0.00059 | 0.00229  |
| 21   | 3PX   | -0.00959 | -0.00262 | -0.25290 | -0.00625 | 0.00361  |
| 22   | 3PY   | 0.42253  | 0.11560  | 0.06015  | 0.00148  | -0.00159 |
| 23   | 3PZ   | -0.03975 | -0.01088 | 0.31549  | 0.00781  | -0.00381 |
| 24   | 4PX   | -0.00811 | -0.00222 | -0.26830 | -0.00664 | 0.00432  |
| 25   | 4PY   | 0.43672  | 0.11948  | 0.05971  | 0.00147  | -0.00451 |
| 26   | 4PZ   | -0.03729 | -0.01021 | 0.31257  | 0.00774  | -0.00635 |
| 27 3 | Br 1S | 0.00032  | 0.00009  | 0.00495  | 0.00012  | 0.00162  |
| 28   | 2S    | -0.00062 | -0.00017 | 0.02482  | 0.00062  | 0.00844  |
| 29   | 3PX   | -0.04754 | -0.01300 | 0.22818  | 0.00564  | -0.00273 |
| 30   | 3PY   | -0.27571 | -0.07543 | 0.02402  | 0.00059  | -0.00512 |
| 31   | 3PZ   | 0.00525  | 0.00145  | 0.26691  | 0.00660  | 0.01330  |
| 32   | 4PX   | -0.05061 | -0.01384 | 0.24260  | 0.00600  | -0.00462 |
| 33   | 4PY   | -0.29251 | -0.08002 | 0.02066  | 0.00051  | -0.00393 |
| 34   | 4PZ   | 0.00655  | 0.00180  | 0.26087  | 0.00646  | 0.01852  |
| 35 4 | O 1S  | -0.00004 | -0.00001 | -0.00001 | 0.00000  | 0.00016  |
| 36   | 2S    | 0.00025  | 0.00005  | -0.00004 | -0.00001 | -0.00039 |
| 37   | 3S    | -0.00129 | -0.00030 | 0.00074  | 0.00005  | -0.00106 |
| 38   | 4PX   | -0.00014 | -0.00006 | 0.00071  | 0.00002  | -0.07180 |
| 39   | 4PY   | -0.00177 | -0.00051 | 0.00124  | 0.00002  | 0.14410  |
| 40   | 4PZ   | -0.00056 | -0.00016 | 0.00033  | 0.00001  | 0.04469  |
| 41   | 5PX   | 0.00138  | 0.00042  | -0.00002 | -0.00001 | -0.05540 |



|    |   |      |          |          |          |          |          |
|----|---|------|----------|----------|----------|----------|----------|
| 42 |   | 5PY  | 0.00003  | -0.00009 | 0.00066  | -0.00001 | 0.11185  |
| 43 |   | 5PZ  | -0.00052 | -0.00016 | 0.00047  | 0.00005  | 0.03463  |
| 44 | 5 | O 1S | 0.00001  | -0.00003 | 0.00000  | -0.00003 | 0.00014  |
| 45 |   | 2S   | 0.00006  | -0.00018 | -0.00001 | -0.00001 | -0.00094 |
| 46 |   | 3S   | -0.00080 | 0.00257  | 0.00004  | 0.00097  | 0.00310  |
| 47 |   | 4PX  | -0.00114 | 0.00396  | 0.00004  | 0.00003  | 0.03437  |
| 48 |   | 4PY  | -0.00135 | 0.00486  | -0.00001 | 0.00157  | 0.01805  |
| 49 |   | 4PZ  | -0.00054 | 0.00192  | -0.00001 | 0.00068  | 0.00773  |
| 50 |   | 5PX  | -0.00096 | 0.00340  | 0.00004  | 0.00027  | 0.02702  |
| 51 |   | 5PY  | -0.00012 | 0.00030  | -0.00009 | 0.00058  | 0.01383  |
| 52 |   | 5PZ  | -0.00041 | 0.00141  | 0.00000  | 0.00065  | 0.00761  |
| 53 | 6 | N 1S | -0.00069 | -0.00019 | 0.00003  | 0.00000  | 0.00241  |
| 54 |   | 2S   | 0.00154  | 0.00042  | -0.00057 | -0.00002 | -0.00770 |
| 55 |   | 3S   | 0.00235  | 0.00062  | 0.00280  | 0.00009  | -0.00922 |
| 56 |   | 4PX  | 0.00042  | 0.00010  | 0.00684  | 0.00017  | -0.15165 |
| 57 |   | 4PY  | 0.00444  | 0.00123  | -0.00870 | -0.00021 | 0.20028  |
| 58 |   | 4PZ  | 0.00290  | 0.00080  | -0.00323 | -0.00008 | 0.09000  |
| 59 |   | 5PX  | 0.01517  | 0.00414  | 0.00752  | 0.00017  | -0.13500 |
| 60 |   | 5PY  | -0.00182 | -0.00049 | -0.00668 | -0.00017 | 0.18835  |
| 61 |   | 5PZ  | 0.01549  | 0.00425  | -0.00865 | -0.00023 | 0.08205  |
| 62 | 7 | N 1S | 0.00038  | 0.00009  | -0.00005 | 0.00000  | -0.00056 |
| 63 |   | 2S   | -0.00057 | -0.00012 | 0.00014  | 0.00000  | 0.00198  |
| 64 |   | 3S   | -0.00158 | -0.00049 | -0.00044 | 0.00007  | 0.00067  |
| 65 |   | 4PX  | -0.00289 | -0.00085 | 0.00167  | 0.00003  | 0.02414  |
| 66 |   | 4PY  | 0.00071  | 0.00021  | -0.00124 | -0.00003 | -0.03750 |
| 67 |   | 4PZ  | -0.00004 | -0.00002 | 0.00009  | 0.00000  | -0.01671 |
| 68 |   | 5PX  | -0.00341 | -0.00105 | 0.00033  | 0.00015  | 0.03122  |
| 69 |   | 5PY  | -0.00460 | -0.00128 | -0.00048 | 0.00007  | -0.06811 |
| 70 |   | 5PZ  | 0.01257  | 0.00341  | -0.00279 | -0.00007 | -0.02002 |
| 71 | 8 | H 1S | -0.00086 | -0.00023 | 0.00079  | 0.00002  | -0.00230 |
| 72 |   | 2S   | -0.01240 | -0.00327 | 0.00397  | 0.00007  | -0.00897 |
| 73 | 9 | N 1S | 0.00009  | -0.00033 | 0.00000  | 0.00012  | 0.00023  |
| 74 |   | 2S   | -0.00024 | 0.00089  | -0.00001 | 0.00005  | -0.00127 |
| 75 |   | 3S   | 0.00060  | -0.00227 | 0.00015  | -0.00347 | 0.00104  |
| 76 |   | 4PX  | 0.00222  | -0.00829 | 0.00006  | -0.00123 | -0.00959 |
| 77 |   | 4PY  | 0.00051  | -0.00192 | 0.00003  | -0.00077 | -0.00481 |
| 78 |   | 4PZ  | -0.00004 | 0.00009  | -0.00002 | 0.00074  | -0.00223 |
| 79 |   | 5PX  | 0.00087  | -0.00355 | -0.00004 | -0.00016 | -0.00982 |
| 80 |   | 5PY  | -0.00109 | 0.00362  | 0.00014  | -0.00116 | -0.00580 |
| 81 |   | 5PZ  | 0.00524  | -0.01875 | 0.00010  | -0.00121 | -0.00540 |

|     |    |   |     |          |          |          |          |          |
|-----|----|---|-----|----------|----------|----------|----------|----------|
| 82  | 10 | H | 1S  | -0.00032 | 0.00120  | -0.00003 | 0.00103  | -0.00101 |
| 83  |    |   | 2S  | -0.00417 | 0.01466  | -0.00015 | 0.00312  | 0.00319  |
| 84  | 11 | N | 1S  | 0.00127  | -0.00465 | 0.00003  | -0.00109 | 0.00384  |
| 85  |    |   | 2S  | -0.00274 | 0.01001  | -0.00006 | 0.00227  | -0.00865 |
| 86  |    |   | 3S  | -0.00665 | 0.02430  | -0.00010 | 0.00444  | -0.02405 |
| 87  |    |   | 4PX | 0.00662  | -0.02431 | 0.00031  | -0.01213 | 0.05887  |
| 88  |    |   | 4PY | -0.00322 | 0.01173  | 0.00005  | -0.00178 | 0.01126  |
| 89  |    |   | 4PZ | 0.00208  | -0.00763 | 0.00004  | -0.00153 | 0.01583  |
| 90  |    |   | 5PX | 0.00280  | -0.01031 | 0.00043  | -0.01653 | 0.05637  |
| 91  |    |   | 5PY | -0.00550 | 0.02008  | -0.00017 | 0.00664  | 0.01661  |
| 92  |    |   | 5PZ | 0.00671  | -0.02456 | 0.00006  | -0.00334 | 0.01919  |
| 93  | 12 | C | 1S  | -0.00563 | -0.00154 | 0.00325  | 0.00008  | 0.00082  |
| 94  |    |   | 2S  | 0.00908  | 0.00249  | -0.00705 | -0.00017 | -0.00172 |
| 95  |    |   | 3S  | 0.06347  | 0.01727  | -0.03062 | -0.00071 | -0.01722 |
| 96  |    |   | 4PX | 0.02260  | 0.00620  | -0.01204 | -0.00030 | 0.10229  |
| 97  |    |   | 4PY | 0.00677  | 0.00186  | -0.00676 | -0.00017 | -0.13964 |
| 98  |    |   | 4PZ | 0.01780  | 0.00487  | -0.01584 | -0.00039 | -0.06273 |
| 99  |    |   | 5PX | -0.06098 | -0.01668 | 0.00245  | 0.00012  | 0.06896  |
| 100 |    |   | 5PY | -0.03790 | -0.01037 | 0.02147  | 0.00055  | -0.09884 |
| 101 |    |   | 5PZ | 0.01325  | 0.00359  | -0.01494 | -0.00033 | -0.05132 |
| 102 | 13 | H | 1S  | 0.00933  | 0.00256  | -0.00697 | -0.00017 | 0.00369  |
| 103 |    |   | 2S  | 0.00394  | 0.00111  | 0.00996  | 0.00019  | 0.01177  |
| 104 | 14 | C | 1S  | 0.00244  | 0.00066  | -0.00130 | -0.00003 | 0.00081  |
| 105 |    |   | 2S  | -0.00279 | -0.00076 | 0.00224  | 0.00007  | -0.00189 |
| 106 |    |   | 3S  | -0.04653 | -0.01269 | 0.02009  | 0.00041  | -0.00890 |
| 107 |    |   | 4PX | -0.00506 | -0.00139 | 0.00720  | 0.00018  | 0.05204  |
| 108 |    |   | 4PY | -0.01460 | -0.00401 | 0.00124  | 0.00003  | -0.08354 |
| 109 |    |   | 4PZ | -0.00285 | -0.00080 | -0.00167 | -0.00004 | -0.03610 |
| 110 |    |   | 5PX | -0.03335 | -0.00907 | 0.01617  | 0.00038  | 0.07992  |
| 111 |    |   | 5PY | -0.03206 | -0.00869 | -0.00267 | -0.00011 | -0.10345 |
| 112 |    |   | 5PZ | 0.00036  | 0.00007  | 0.00038  | 0.00007  | -0.04191 |
| 113 | 15 | H | 1S  | -0.00135 | -0.00037 | 0.00138  | 0.00004  | 0.00401  |
| 114 |    |   | 2S  | -0.00807 | -0.00216 | -0.00051 | -0.00005 | 0.00562  |
| 115 | 16 | C | 1S  | -0.00104 | -0.00028 | 0.00028  | 0.00001  | -0.00097 |
| 116 |    |   | 2S  | 0.00184  | 0.00049  | -0.00036 | -0.00001 | 0.00092  |
| 117 |    |   | 3S  | 0.01970  | 0.00546  | -0.00382 | -0.00024 | 0.03102  |
| 118 |    |   | 4PX | 0.00542  | 0.00151  | -0.00395 | -0.00009 | -0.15245 |
| 119 |    |   | 4PY | -0.00201 | -0.00052 | 0.00350  | 0.00009  | 0.26233  |
| 120 |    |   | 4PZ | 0.00643  | 0.00176  | -0.00500 | -0.00013 | 0.10495  |
| 121 |    |   | 5PX | -0.01691 | -0.00468 | -0.00111 | 0.00025  | -0.14716 |

|     |    |      |          |          |          |          |          |
|-----|----|------|----------|----------|----------|----------|----------|
| 122 |    | 5PY  | 0.00262  | 0.00060  | 0.00239  | 0.00022  | 0.25395  |
| 123 |    | 5PZ  | -0.03782 | -0.01033 | 0.00554  | 0.00016  | 0.10573  |
| 124 | 17 | C 1S | -0.00112 | -0.00031 | 0.00113  | 0.00003  | 0.00092  |
| 125 |    | 2S   | 0.00147  | 0.00040  | -0.00053 | -0.00001 | -0.00258 |
| 126 |    | 3S   | 0.02050  | 0.00562  | -0.03102 | -0.00072 | -0.00272 |
| 127 |    | 4PX  | 0.00020  | 0.00006  | -0.00629 | -0.00016 | 0.05657  |
| 128 |    | 4PY  | 0.00952  | 0.00259  | 0.00166  | 0.00004  | -0.09028 |
| 129 |    | 4PZ  | 0.00190  | 0.00051  | 0.00282  | 0.00007  | -0.03495 |
| 130 |    | 5PX  | 0.02365  | 0.00650  | -0.01289 | -0.00030 | 0.06223  |
| 131 |    | 5PY  | 0.03494  | 0.00957  | -0.01127 | -0.00026 | -0.09938 |
| 132 |    | 5PZ  | -0.01690 | -0.00463 | 0.01112  | 0.00026  | -0.05190 |
| 133 | 18 | H 1S | 0.00011  | 0.00003  | -0.00098 | -0.00002 | 0.00396  |
| 134 |    | 2S   | -0.00046 | -0.00011 | 0.00161  | 0.00002  | 0.00084  |
| 135 | 19 | C 1S | 0.00216  | 0.00059  | -0.00205 | -0.00005 | 0.00062  |
| 136 |    | 2S   | -0.00259 | -0.00071 | 0.00308  | 0.00009  | -0.00162 |
| 137 |    | 3S   | -0.01822 | -0.00499 | 0.03442  | 0.00077  | -0.01239 |
| 138 |    | 4PX  | -0.00760 | -0.00207 | 0.00338  | 0.00008  | 0.10496  |
| 139 |    | 4PY  | 0.00005  | 0.00001  | 0.00482  | 0.00012  | -0.14934 |
| 140 |    | 4PZ  | 0.00715  | 0.00196  | -0.01316 | -0.00033 | -0.06197 |
| 141 |    | 5PX  | 0.05123  | 0.01402  | -0.02785 | -0.00065 | 0.08102  |
| 142 |    | 5PY  | 0.02400  | 0.00657  | -0.01363 | -0.00030 | -0.11548 |
| 143 |    | 5PZ  | -0.00667 | -0.00180 | -0.01500 | -0.00042 | -0.03271 |
| 144 | 20 | H 1S | -0.00353 | -0.00096 | 0.00517  | 0.00013  | 0.00370  |
| 145 |    | 2S   | -0.02046 | -0.00558 | -0.00969 | -0.00027 | 0.01647  |
| 146 | 21 | C 1S | -0.00025 | -0.00005 | 0.00022  | 0.00001  | 0.00027  |
| 147 |    | 2S   | 0.00112  | 0.00025  | -0.00061 | 0.00002  | -0.00086 |
| 148 |    | 3S   | 0.00354  | 0.00096  | -0.00155 | -0.00049 | -0.00062 |
| 149 |    | 4PX  | 0.00192  | 0.00060  | -0.00080 | -0.00001 | 0.09237  |
| 150 |    | 4PY  | 0.00101  | 0.00032  | -0.00115 | -0.00002 | -0.18304 |
| 151 |    | 4PZ  | 0.00103  | 0.00023  | -0.00086 | -0.00003 | -0.05929 |
| 152 |    | 5PX  | -0.00015 | -0.00019 | -0.00329 | 0.00030  | 0.04811  |
| 153 |    | 5PY  | 0.00013  | 0.00032  | -0.00289 | 0.00012  | -0.08584 |
| 154 |    | 5PZ  | -0.00387 | -0.00085 | 0.00156  | 0.00002  | -0.02804 |
| 155 | 22 | C 1S | 0.00017  | 0.00001  | -0.00008 | 0.00000  | -0.00086 |
| 156 |    | 2S   | -0.00016 | -0.00006 | 0.00040  | 0.00002  | 0.00146  |
| 157 |    | 3S   | -0.00152 | 0.00061  | -0.00153 | 0.00010  | 0.01177  |
| 158 |    | 4PX  | -0.00090 | -0.00040 | 0.00055  | -0.00002 | -0.01051 |
| 159 |    | 4PY  | -0.00079 | -0.00028 | 0.00072  | 0.00001  | 0.02167  |
| 160 |    | 4PZ  | 0.00043  | 0.00004  | -0.00038 | -0.00002 | 0.00640  |
| 161 |    | 5PX  | -0.00056 | -0.00010 | -0.00136 | 0.00042  | 0.03060  |

|     |    |      |          |          |          |          |          |
|-----|----|------|----------|----------|----------|----------|----------|
| 162 |    | 5PY  | 0.00117  | -0.00129 | -0.00051 | 0.00029  | -0.07948 |
| 163 |    | 5PZ  | 0.00223  | -0.00026 | 0.00008  | -0.00022 | -0.03147 |
| 164 | 23 | H 1S | 0.00008  | 0.00007  | -0.00020 | 0.00001  | -0.02721 |
| 165 |    | 2S   | 0.00080  | -0.00047 | -0.00029 | 0.00004  | -0.08559 |
| 166 | 24 | H 1S | 0.00000  | -0.00006 | 0.00015  | 0.00000  | 0.02788  |
| 167 |    | 2S   | -0.00116 | 0.00066  | -0.00012 | 0.00009  | 0.08885  |
| 168 | 25 | C 1S | -0.00007 | 0.00000  | 0.00002  | 0.00001  | -0.00009 |
| 169 |    | 2S   | 0.00002  | -0.00002 | 0.00004  | 0.00001  | 0.00109  |
| 170 |    | 3S   | 0.00139  | 0.00069  | -0.00018 | -0.00028 | -0.00376 |
| 171 |    | 4PX  | 0.00041  | 0.00023  | -0.00014 | 0.00002  | -0.00002 |
| 172 |    | 4PY  | 0.00018  | 0.00038  | -0.00014 | 0.00010  | -0.00029 |
| 173 |    | 4PZ  | 0.00026  | 0.00005  | -0.00008 | -0.00003 | -0.00094 |
| 174 |    | 5PX  | 0.00141  | -0.00155 | -0.00134 | 0.00018  | -0.06033 |
| 175 |    | 5PY  | -0.00147 | 0.00155  | -0.00039 | 0.00012  | 0.11253  |
| 176 |    | 5PZ  | 0.00020  | -0.00048 | 0.00013  | -0.00029 | 0.02890  |
| 177 | 26 | H 1S | 0.00001  | -0.00009 | 0.00003  | -0.00001 | 0.00221  |
| 178 |    | 2S   | -0.00056 | 0.00001  | 0.00002  | -0.00028 | 0.05365  |
| 179 | 27 | H 1S | 0.00006  | 0.00006  | -0.00006 | 0.00003  | -0.00314 |
| 180 |    | 2S   | 0.00077  | -0.00092 | -0.00035 | 0.00011  | -0.06387 |
| 181 | 28 | C 1S | 0.00010  | -0.00010 | -0.00003 | 0.00001  | -0.00254 |
| 182 |    | 2S   | -0.00017 | 0.00022  | 0.00016  | 0.00001  | 0.00623  |
| 183 |    | 3S   | -0.00119 | 0.00155  | -0.00044 | 0.00009  | 0.02298  |
| 184 |    | 4PX  | -0.00019 | -0.00058 | 0.00021  | 0.00003  | -0.00738 |
| 185 |    | 4PY  | -0.00022 | -0.00005 | 0.00011  | -0.00013 | -0.00539 |
| 186 |    | 4PZ  | 0.00010  | 0.00006  | -0.00005 | -0.00002 | -0.00850 |
| 187 |    | 5PX  | -0.00095 | 0.00070  | -0.00077 | 0.00117  | 0.03166  |
| 188 |    | 5PY  | 0.00136  | -0.00327 | -0.00067 | -0.00001 | -0.08087 |
| 189 |    | 5PZ  | 0.00003  | 0.00038  | -0.00029 | 0.00054  | -0.03991 |
| 190 | 29 | H 1S | -0.00007 | 0.00011  | 0.00004  | -0.00002 | -0.00129 |
| 191 |    | 2S   | -0.00038 | 0.00050  | 0.00017  | -0.00036 | 0.04749  |
| 192 | 30 | H 1S | -0.00003 | 0.00003  | 0.00004  | 0.00013  | 0.00056  |
| 193 |    | 2S   | 0.00112  | -0.00215 | -0.00013 | -0.00059 | -0.05032 |
| 194 | 31 | C 1S | 0.00002  | -0.00021 | 0.00003  | -0.00006 | 0.00073  |
| 195 |    | 2S   | 0.00001  | 0.00030  | -0.00003 | 0.00034  | -0.00102 |
| 196 |    | 3S   | -0.00052 | 0.00285  | -0.00015 | -0.00118 | -0.00475 |
| 197 |    | 4PX  | 0.00024  | 0.00008  | -0.00013 | -0.00016 | 0.00304  |
| 198 |    | 4PY  | -0.00037 | 0.00166  | -0.00005 | 0.00072  | 0.00151  |
| 199 |    | 4PZ  | 0.00023  | -0.00046 | -0.00005 | -0.00035 | -0.00011 |
| 200 |    | 5PX  | 0.00031  | -0.00082 | -0.00071 | 0.00098  | -0.01834 |
| 201 |    | 5PY  | -0.00059 | 0.00176  | 0.00019  | -0.00072 | 0.02646  |

|     |    |      |          |          |          |          |          |
|-----|----|------|----------|----------|----------|----------|----------|
| 202 |    | 5PZ  | 0.00079  | -0.00321 | -0.00037 | 0.00067  | -0.00087 |
| 203 | 32 | H 1S | 0.00007  | -0.00020 | 0.00000  | 0.00001  | -0.00238 |
| 204 |    | 2S   | 0.00047  | -0.00206 | -0.00004 | -0.00049 | 0.00237  |
| 205 | 33 | H 1S | 0.00004  | -0.00043 | 0.00006  | -0.00009 | -0.00531 |
| 206 |    | 2S   | -0.00015 | -0.00003 | -0.00017 | -0.00038 | -0.00548 |
| 207 | 34 | C 1S | -0.00006 | 0.00020  | 0.00000  | 0.00021  | -0.00037 |
| 208 |    | 2S   | 0.00032  | -0.00114 | 0.00007  | -0.00046 | 0.00310  |
| 209 |    | 3S   | 0.00243  | -0.00851 | -0.00041 | -0.00171 | -0.02108 |
| 210 |    | 4PX  | 0.00015  | -0.00042 | -0.00002 | 0.00034  | -0.04135 |
| 211 |    | 4PY  | 0.00069  | -0.00255 | 0.00001  | -0.00085 | -0.02323 |
| 212 |    | 4PZ  | 0.00045  | -0.00159 | 0.00002  | -0.00072 | -0.00889 |
| 213 |    | 5PX  | 0.00019  | -0.00054 | -0.00029 | 0.00142  | -0.03006 |
| 214 |    | 5PY  | 0.00035  | -0.00038 | 0.00059  | -0.00378 | -0.00903 |
| 215 |    | 5PZ  | -0.00135 | 0.00463  | 0.00011  | 0.00099  | -0.00438 |
| 216 | 35 | C 1S | -0.00007 | 0.00024  | 0.00001  | -0.00028 | 0.00038  |
| 217 |    | 2S   | 0.00011  | -0.00038 | -0.00001 | 0.00046  | -0.00130 |
| 218 |    | 3S   | 0.00192  | -0.00682 | -0.00026 | 0.00751  | -0.00439 |
| 219 |    | 4PX  | -0.00261 | 0.00955  | -0.00006 | 0.00257  | 0.06469  |
| 220 |    | 4PY  | -0.00109 | 0.00397  | -0.00004 | 0.00180  | 0.03060  |
| 221 |    | 4PZ  | 0.00135  | -0.00494 | 0.00016  | -0.00663 | 0.01769  |
| 222 |    | 5PX  | 0.00353  | -0.01262 | -0.00033 | 0.00474  | 0.05837  |
| 223 |    | 5PY  | -0.00003 | 0.00004  | 0.00039  | -0.00186 | 0.03496  |
| 224 |    | 5PZ  | -0.01889 | 0.06881  | 0.00010  | 0.00048  | 0.01368  |
| 225 | 36 | C 1S | -0.00011 | 0.00039  | -0.00003 | 0.00127  | -0.00002 |
| 226 |    | 2S   | 0.00013  | -0.00045 | 0.00003  | -0.00109 | -0.00110 |
| 227 |    | 3S   | 0.00220  | -0.00805 | 0.00072  | -0.02925 | 0.01358  |
| 228 |    | 4PX  | 0.00429  | -0.01560 | 0.00000  | -0.00036 | -0.02543 |
| 229 |    | 4PY  | 0.00236  | -0.00856 | 0.00015  | -0.00636 | -0.01489 |
| 230 |    | 4PZ  | 0.00112  | -0.00408 | -0.00001 | 0.00026  | -0.00738 |
| 231 |    | 5PX  | -0.00195 | 0.00683  | 0.00004  | -0.00102 | -0.03278 |
| 232 |    | 5PY  | 0.01630  | -0.05916 | 0.00031  | -0.01375 | -0.01097 |
| 233 |    | 5PZ  | -0.00068 | 0.00252  | -0.00004 | 0.00108  | -0.01150 |
| 234 | 37 | H 1S | 0.00051  | -0.00187 | 0.00004  | -0.00175 | 0.00041  |
| 235 |    | 2S   | 0.00246  | -0.00890 | -0.00002 | 0.00006  | 0.00105  |
| 236 | 38 | C 1S | 0.00073  | -0.00266 | 0.00008  | -0.00310 | -0.00017 |
| 237 |    | 2S   | -0.00118 | 0.00434  | -0.00015 | 0.00614  | 0.00093  |
| 238 |    | 3S   | -0.00734 | 0.02642  | -0.00102 | 0.04053  | -0.00404 |
| 239 |    | 4PX  | 0.00445  | -0.01626 | 0.00010  | -0.00400 | -0.03588 |
| 240 |    | 4PY  | 0.00032  | -0.00116 | -0.00025 | 0.01016  | -0.02063 |
| 241 |    | 4PZ  | 0.00455  | -0.01662 | 0.00046  | -0.01888 | -0.00744 |

|     |    |       |          |          |          |          |          |
|-----|----|-------|----------|----------|----------|----------|----------|
| 242 |    | 5PX   | -0.01287 | 0.04700  | -0.00049 | 0.01922  | -0.03499 |
| 243 |    | 5PY   | 0.01605  | -0.05853 | 0.00038  | -0.01339 | 0.00702  |
| 244 |    | 5PZ   | -0.00440 | 0.01618  | 0.00022  | -0.01189 | -0.00164 |
| 245 | 39 | H 1S  | -0.00106 | 0.00387  | -0.00019 | 0.00765  | 0.00087  |
| 246 |    | 2S    | -0.00921 | 0.03372  | 0.00020  | -0.01049 | -0.00145 |
| 247 | 40 | C 1S  | -0.00139 | 0.00509  | -0.00006 | 0.00260  | -0.00158 |
| 248 |    | 2S    | 0.00219  | -0.00800 | 0.00012  | -0.00486 | 0.00496  |
| 249 |    | 3S    | 0.01199  | -0.04372 | 0.00090  | -0.03343 | 0.00641  |
| 250 |    | 4PX   | -0.00255 | 0.00934  | -0.00015 | 0.00620  | -0.04028 |
| 251 |    | 4PY   | 0.00463  | -0.01692 | 0.00019  | -0.00772 | -0.01806 |
| 252 |    | 4PZ   | 0.00339  | -0.01240 | 0.00035  | -0.01405 | -0.01585 |
| 253 |    | 5PX   | 0.01418  | -0.05181 | -0.00025 | 0.00855  | -0.02928 |
| 254 |    | 5PY   | -0.01676 | 0.06124  | -0.00029 | 0.01358  | -0.02743 |
| 255 |    | 5PZ   | -0.00146 | 0.00538  | 0.00072  | -0.02826 | -0.00981 |
| 256 | 41 | H 1S  | 0.00249  | -0.00911 | 0.00015  | -0.00608 | 0.00224  |
| 257 |    | 2S    | 0.00612  | -0.02241 | -0.00060 | 0.02176  | 0.00638  |
| 258 | 42 | C 1S  | 0.00074  | -0.00271 | 0.00003  | -0.00129 | 0.00082  |
| 259 |    | 2S    | -0.00132 | 0.00483  | -0.00004 | 0.00206  | -0.00180 |
| 260 |    | 3S    | -0.00744 | 0.02732  | -0.00066 | 0.02063  | -0.01093 |
| 261 |    | 4PX   | -0.00435 | 0.01598  | -0.00004 | 0.00111  | -0.01294 |
| 262 |    | 4PY   | -0.00700 | 0.02564  | -0.00020 | 0.00792  | -0.01127 |
| 263 |    | 4PZ   | -0.00169 | 0.00618  | -0.00004 | 0.00156  | -0.00357 |
| 264 |    | 5PX   | 0.00355  | -0.01292 | 0.00026  | -0.01035 | -0.01343 |
| 265 |    | 5PY   | -0.01718 | 0.06271  | -0.00026 | 0.00744  | -0.02089 |
| 266 |    | 5PZ   | -0.00275 | 0.01004  | -0.00016 | 0.01143  | -0.00866 |
| 267 | 43 | H 1S  | 0.00017  | -0.00064 | -0.00002 | 0.00102  | 0.00101  |
| 268 |    | 2S    | -0.00271 | 0.00988  | 0.00002  | -0.00369 | 0.00139  |
| 269 | 44 | Zn 1S | 0.00079  | -0.00290 | 0.00003  | -0.00104 | 0.00469  |
| 270 |    | 2S    | 0.00287  | -0.01052 | 0.00017  | -0.00674 | -0.00643 |
| 271 |    | 3PX   | -0.00035 | 0.00127  | 0.00024  | -0.00960 | 0.02474  |
| 272 |    | 3PY   | -0.00553 | 0.02022  | -0.00021 | 0.00853  | -0.01422 |
| 273 |    | 3PZ   | -0.00041 | 0.00149  | 0.00099  | -0.03957 | -0.00797 |
| 274 |    | 4PX   | 0.00207  | -0.00756 | 0.00009  | -0.00340 | -0.00493 |
| 275 |    | 4PY   | -0.00478 | 0.01750  | -0.00015 | 0.00682  | -0.00061 |
| 276 |    | 4PZ   | 0.00311  | -0.01137 | -0.00207 | 0.08341  | 0.00142  |
| 277 |    | 5D 0  | -0.00030 | 0.00108  | -0.00028 | 0.01124  | -0.00503 |
| 278 |    | 5D+1  | -0.00141 | 0.00515  | 0.00174  | -0.07043 | 0.00971  |
| 279 |    | 5D-1  | -0.01684 | 0.06156  | -0.00012 | 0.00483  | 0.00337  |
| 280 |    | 5D+2  | 0.00045  | -0.00162 | 0.00012  | -0.00489 | -0.02766 |
| 281 |    | 5D-2  | -0.00444 | 0.01622  | 0.00007  | -0.00285 | -0.00333 |

|        |       |          |          |          |          |          |
|--------|-------|----------|----------|----------|----------|----------|
| 282    | 6D 0  | -0.00009 | 0.00033  | -0.00004 | 0.00169  | -0.00031 |
| 283    | 6D+1  | -0.00013 | 0.00049  | 0.00020  | -0.00805 | 0.00140  |
| 284    | 6D-1  | -0.00222 | 0.00813  | -0.00002 | 0.00062  | 0.00052  |
| 285    | 6D+2  | -0.00014 | 0.00050  | 0.00001  | -0.00033 | -0.00357 |
| 286    | 6D-2  | -0.00086 | 0.00314  | 0.00000  | 0.00013  | -0.00121 |
| 287 45 | Br 1S | 0.00017  | -0.00060 | -0.00012 | 0.00505  | 0.00029  |
| 288    | 2S    | 0.00075  | -0.00274 | -0.00058 | 0.02362  | 0.00226  |
| 289    | 3PX   | 0.00261  | -0.00955 | 0.00626  | -0.25294 | -0.00352 |
| 290    | 3PY   | -0.11562 | 0.42260  | -0.00149 | 0.06020  | 0.00155  |
| 291    | 3PZ   | 0.01088  | -0.03980 | -0.00780 | 0.31551  | 0.00376  |
| 292    | 4PX   | 0.00221  | -0.00806 | 0.00664  | -0.26834 | -0.00421 |
| 293    | 4PY   | -0.11950 | 0.43679  | -0.00148 | 0.05976  | 0.00440  |
| 294    | 4PZ   | 0.01021  | -0.03733 | -0.00773 | 0.31259  | 0.00626  |
| 295 46 | Br 1S | 0.00009  | -0.00032 | 0.00012  | -0.00495 | 0.00158  |
| 296    | 2S    | -0.00017 | 0.00063  | 0.00061  | -0.02482 | 0.00826  |
| 297    | 3PX   | 0.01302  | -0.04756 | -0.00564 | 0.22812  | 0.00267  |
| 298    | 3PY   | 0.07540  | -0.27559 | -0.00059 | 0.02400  | 0.00500  |
| 299    | 3PZ   | -0.00142 | 0.00524  | -0.00660 | 0.26688  | -0.01302 |
| 300    | 4PX   | 0.01386  | -0.05063 | -0.00600 | 0.24255  | 0.00451  |
| 301    | 4PY   | 0.08000  | -0.29239 | -0.00051 | 0.02064  | 0.00384  |
| 302    | 4PZ   | -0.00178 | 0.00653  | -0.00645 | 0.26084  | -0.01813 |
| 303 47 | O 1S  | -0.00001 | 0.00004  | 0.00000  | 0.00001  | 0.00015  |
| 304    | 2S    | 0.00008  | -0.00024 | 0.00001  | 0.00004  | -0.00038 |
| 305    | 3S    | -0.00040 | 0.00127  | -0.00001 | -0.00074 | -0.00101 |
| 306    | 4PX   | 0.00002  | -0.00015 | -0.00001 | 0.00071  | 0.07027  |
| 307    | 4PY   | 0.00046  | -0.00178 | -0.00004 | 0.00124  | -0.14100 |
| 308    | 4PZ   | 0.00015  | -0.00056 | -0.00001 | 0.00033  | -0.04373 |
| 309    | 5PX   | -0.00034 | 0.00140  | -0.00001 | -0.00002 | 0.05421  |
| 310    | 5PY   | -0.00009 | -0.00002 | -0.00004 | 0.00066  | -0.10943 |
| 311    | 5PZ   | 0.00012  | -0.00053 | 0.00002  | 0.00047  | -0.03389 |
| 312 48 | O 1S  | 0.00003  | 0.00001  | 0.00003  | 0.00000  | 0.00015  |
| 313    | 2S    | 0.00019  | 0.00003  | 0.00001  | 0.00001  | -0.00095 |
| 314    | 3S    | -0.00262 | -0.00062 | -0.00097 | -0.00009 | 0.00304  |
| 315    | 4PX   | 0.00398  | 0.00103  | 0.00003  | 0.00004  | -0.03481 |
| 316    | 4PY   | 0.00487  | 0.00131  | 0.00157  | 0.00006  | -0.01826 |
| 317    | 4PZ   | 0.00193  | 0.00052  | 0.00068  | 0.00003  | -0.00782 |
| 318    | 5PX   | 0.00341  | 0.00091  | 0.00026  | 0.00005  | -0.02738 |
| 319    | 5PY   | 0.00032  | 0.00005  | 0.00058  | -0.00006 | -0.01397 |
| 320    | 5PZ   | 0.00142  | 0.00037  | 0.00065  | 0.00004  | -0.00765 |
| 321 49 | N 1S  | -0.00019 | 0.00069  | 0.00000  | -0.00003 | 0.00237  |

|     |    |      |          |          |          |          |          |
|-----|----|------|----------|----------|----------|----------|----------|
| 322 |    | 2S   | 0.00042  | -0.00155 | -0.00001 | 0.00057  | -0.00755 |
| 323 |    | 3S   | 0.00066  | -0.00235 | 0.00005  | -0.00280 | -0.00907 |
| 324 |    | 4PX  | -0.00013 | 0.00042  | -0.00017 | 0.00683  | 0.14837  |
| 325 |    | 4PY  | -0.00121 | 0.00446  | 0.00022  | -0.00870 | -0.19593 |
| 326 |    | 4PZ  | -0.00079 | 0.00290  | 0.00008  | -0.00323 | -0.08805 |
| 327 |    | 5PX  | -0.00416 | 0.01518  | -0.00021 | 0.00752  | 0.13209  |
| 328 |    | 5PY  | 0.00050  | -0.00180 | 0.00016  | -0.00669 | -0.18426 |
| 329 |    | 5PZ  | -0.00423 | 0.01549  | 0.00020  | -0.00865 | -0.08027 |
| 330 | 50 | N 1S | 0.00011  | -0.00037 | 0.00000  | 0.00005  | -0.00056 |
| 331 |    | 2S   | -0.00019 | 0.00055  | 0.00001  | -0.00014 | 0.00195  |
| 332 |    | 3S   | -0.00039 | 0.00161  | -0.00009 | 0.00044  | 0.00068  |
| 333 |    | 4PX  | 0.00074  | -0.00292 | -0.00005 | 0.00167  | -0.02360 |
| 334 |    | 4PY  | -0.00018 | 0.00071  | 0.00003  | -0.00124 | 0.03668  |
| 335 |    | 4PZ  | 0.00001  | -0.00004 | -0.00001 | 0.00009  | 0.01636  |
| 336 |    | 5PX  | 0.00083  | -0.00347 | 0.00013  | 0.00034  | -0.03053 |
| 337 |    | 5PY  | 0.00124  | -0.00461 | 0.00010  | -0.00047 | 0.06661  |
| 338 |    | 5PZ  | -0.00347 | 0.01256  | 0.00006  | -0.00279 | 0.01959  |
| 339 | 51 | H 1S | -0.00024 | 0.00086  | 0.00002  | -0.00079 | -0.00225 |
| 340 |    | 2S   | -0.00350 | 0.01233  | 0.00012  | -0.00397 | -0.00875 |
| 341 | 52 | N 1S | 0.00033  | 0.00009  | -0.00012 | 0.00000  | 0.00023  |
| 342 |    | 2S   | -0.00089 | -0.00025 | -0.00005 | 0.00001  | -0.00126 |
| 343 |    | 3S   | 0.00226  | 0.00064  | 0.00347  | 0.00002  | 0.00096  |
| 344 |    | 4PX  | -0.00826 | -0.00231 | -0.00123 | 0.00000  | 0.00977  |
| 345 |    | 4PY  | -0.00191 | -0.00054 | -0.00077 | -0.00001 | 0.00491  |
| 346 |    | 4PZ  | 0.00010  | 0.00002  | 0.00074  | 0.00002  | 0.00229  |
| 347 |    | 5PX  | -0.00350 | -0.00106 | -0.00016 | -0.00005 | 0.01021  |
| 348 |    | 5PY  | 0.00367  | 0.00090  | -0.00116 | 0.00008  | 0.00586  |
| 349 |    | 5PZ  | -0.01881 | -0.00504 | -0.00122 | 0.00004  | 0.00530  |
| 350 | 53 | H 1S | -0.00120 | -0.00033 | -0.00103 | -0.00002 | -0.00101 |
| 351 |    | 2S   | -0.01475 | -0.00388 | -0.00313 | 0.00000  | 0.00306  |
| 352 | 54 | N 1S | 0.00465  | 0.00127  | 0.00109  | 0.00003  | 0.00393  |
| 353 |    | 2S   | -0.01000 | -0.00274 | -0.00226 | -0.00005 | -0.00884 |
| 354 |    | 3S   | -0.02428 | -0.00664 | -0.00443 | -0.00012 | -0.02458 |
| 355 |    | 4PX  | -0.02428 | -0.00667 | -0.01212 | -0.00029 | -0.05976 |
| 356 |    | 4PY  | 0.01172  | 0.00320  | -0.00178 | -0.00004 | -0.01129 |
| 357 |    | 4PZ  | -0.00762 | -0.00209 | -0.00153 | -0.00003 | -0.01606 |
| 358 |    | 5PX  | -0.01029 | -0.00284 | -0.01653 | -0.00038 | -0.05724 |
| 359 |    | 5PY  | 0.02007  | 0.00548  | 0.00663  | 0.00015  | -0.01676 |
| 360 |    | 5PZ  | -0.02456 | -0.00673 | -0.00333 | -0.00010 | -0.01953 |
| 361 | 55 | C 1S | -0.00154 | 0.00563  | 0.00008  | -0.00325 | 0.00081  |



|     |    |      |          |          |          |          |          |
|-----|----|------|----------|----------|----------|----------|----------|
| 362 |    | 2S   | 0.00248  | -0.00908 | -0.00018 | 0.00705  | -0.00168 |
| 363 |    | 3S   | 0.01745  | -0.06343 | -0.00080 | 0.03061  | -0.01688 |
| 364 |    | 4PX  | -0.00617 | 0.02261  | 0.00030  | -0.01204 | -0.10012 |
| 365 |    | 4PY  | -0.00185 | 0.00677  | 0.00017  | -0.00676 | 0.13667  |
| 366 |    | 4PZ  | -0.00487 | 0.01780  | 0.00039  | -0.01584 | 0.06141  |
| 367 |    | 5PX  | 0.01669  | -0.06098 | 0.00000  | 0.00246  | -0.06749 |
| 368 |    | 5PY  | 0.01037  | -0.03790 | -0.00051 | 0.02146  | 0.09675  |
| 369 |    | 5PZ  | -0.00365 | 0.01322  | 0.00041  | -0.01492 | 0.05027  |
| 370 | 56 | H 1S | 0.00255  | -0.00933 | -0.00017 | 0.00697  | 0.00362  |
| 371 |    | 2S   | 0.00105  | -0.00395 | 0.00030  | -0.00994 | 0.01154  |
| 372 | 57 | C 1S | 0.00067  | -0.00244 | -0.00003 | 0.00130  | 0.00079  |
| 373 |    | 2S   | -0.00076 | 0.00278  | 0.00005  | -0.00224 | -0.00185 |
| 374 |    | 3S   | -0.01276 | 0.04651  | 0.00058  | -0.02009 | -0.00870 |
| 375 |    | 4PX  | 0.00138  | -0.00506 | -0.00018 | 0.00720  | -0.05086 |
| 376 |    | 4PY  | 0.00397  | -0.01460 | -0.00003 | 0.00124  | 0.08166  |
| 377 |    | 4PZ  | 0.00077  | -0.00286 | 0.00004  | -0.00168 | 0.03529  |
| 378 |    | 5PX  | 0.00917  | -0.03332 | -0.00042 | 0.01616  | -0.07814 |
| 379 |    | 5PY  | 0.00884  | -0.03202 | 0.00002  | -0.00267 | 0.10114  |
| 380 |    | 5PZ  | -0.00013 | 0.00035  | 0.00005  | 0.00037  | 0.04094  |
| 381 | 58 | H 1S | -0.00037 | 0.00135  | 0.00003  | -0.00138 | 0.00393  |
| 382 |    | 2S   | -0.00225 | 0.00805  | 0.00003  | 0.00050  | 0.00548  |
| 383 | 59 | C 1S | -0.00029 | 0.00104  | 0.00000  | -0.00028 | -0.00094 |
| 384 |    | 2S   | 0.00051  | -0.00183 | -0.00001 | 0.00036  | 0.00089  |
| 385 |    | 3S   | 0.00533  | -0.01975 | 0.00005  | 0.00383  | 0.03034  |
| 386 |    | 4PX  | -0.00146 | 0.00543  | 0.00010  | -0.00395 | 0.14914  |
| 387 |    | 4PY  | 0.00057  | -0.00199 | -0.00008 | 0.00350  | -0.25665 |
| 388 |    | 4PZ  | -0.00176 | 0.00643  | 0.00012  | -0.00500 | -0.10267 |
| 389 |    | 5PX  | 0.00458  | -0.01694 | 0.00031  | -0.00110 | 0.14393  |
| 390 |    | 5PY  | -0.00082 | 0.00256  | 0.00010  | 0.00240  | -0.24845 |
| 391 |    | 5PZ  | 0.01036  | -0.03782 | -0.00011 | 0.00553  | -0.10342 |
| 392 | 60 | C 1S | -0.00031 | 0.00112  | 0.00003  | -0.00113 | 0.00090  |
| 393 |    | 2S   | 0.00040  | -0.00147 | -0.00001 | 0.00053  | -0.00252 |
| 394 |    | 3S   | 0.00560  | -0.02051 | -0.00082 | 0.03102  | -0.00265 |
| 395 |    | 4PX  | -0.00005 | 0.00021  | 0.00015  | -0.00629 | -0.05539 |
| 396 |    | 4PY  | -0.00262 | 0.00951  | -0.00004 | 0.00166  | 0.08840  |
| 397 |    | 4PZ  | -0.00053 | 0.00190  | -0.00007 | 0.00282  | 0.03422  |
| 398 |    | 5PX  | -0.00645 | 0.02367  | 0.00034  | -0.01288 | -0.06095 |
| 399 |    | 5PY  | -0.00956 | 0.03495  | 0.00030  | -0.01127 | 0.09729  |
| 400 |    | 5PZ  | 0.00462  | -0.01692 | -0.00029 | 0.01111  | 0.05080  |
| 401 | 61 | H 1S | 0.00003  | -0.00011 | -0.00003 | 0.00098  | 0.00387  |

|     |    |      |          |          |          |          |          |
|-----|----|------|----------|----------|----------|----------|----------|
| 402 |    | 2S   | -0.00014 | 0.00045  | 0.00006  | -0.00161 | 0.00084  |
| 403 | 62 | C 1S | 0.00059  | -0.00216 | -0.00005 | 0.00205  | 0.00061  |
| 404 |    | 2S   | -0.00071 | 0.00259  | 0.00007  | -0.00308 | -0.00158 |
| 405 |    | 3S   | -0.00498 | 0.01823  | 0.00093  | -0.03441 | -0.01213 |
| 406 |    | 4PX  | 0.00209  | -0.00760 | -0.00008 | 0.00338  | -0.10264 |
| 407 |    | 4PY  | -0.00001 | 0.00005  | -0.00012 | 0.00482  | 0.14606  |
| 408 |    | 4PZ  | -0.00196 | 0.00715  | 0.00032  | -0.01316 | 0.06060  |
| 409 |    | 5PX  | -0.01402 | 0.05123  | 0.00072  | -0.02785 | -0.07925 |
| 410 |    | 5PY  | -0.00656 | 0.02400  | 0.00038  | -0.01363 | 0.11286  |
| 411 |    | 5PZ  | 0.00184  | -0.00664 | 0.00032  | -0.01500 | 0.03200  |
| 412 | 63 | H 1S | -0.00097 | 0.00353  | 0.00013  | -0.00517 | 0.00362  |
| 413 |    | 2S   | -0.00561 | 0.02045  | -0.00021 | 0.00969  | 0.01608  |
| 414 | 64 | C 1S | -0.00008 | 0.00024  | 0.00000  | -0.00022 | 0.00028  |
| 415 |    | 2S   | 0.00036  | -0.00109 | -0.00005 | 0.00061  | -0.00087 |
| 416 |    | 3S   | 0.00098  | -0.00354 | 0.00042  | 0.00157  | -0.00071 |
| 417 |    | 4PX  | -0.00046 | 0.00195  | 0.00003  | -0.00080 | -0.09041 |
| 418 |    | 4PY  | -0.00023 | 0.00103  | 0.00003  | -0.00115 | 0.17908  |
| 419 |    | 4PZ  | -0.00033 | 0.00100  | 0.00002  | -0.00086 | 0.05804  |
| 420 |    | 5PX  | -0.00009 | -0.00022 | 0.00047  | -0.00327 | -0.04714 |
| 421 |    | 5PY  | 0.00021  | 0.00028  | 0.00026  | -0.00288 | 0.08393  |
| 422 |    | 5PZ  | 0.00124  | -0.00377 | -0.00005 | 0.00156  | 0.02739  |
| 423 | 65 | C 1S | 0.00008  | -0.00015 | 0.00000  | 0.00008  | -0.00086 |
| 424 |    | 2S   | -0.00003 | 0.00017  | 0.00000  | -0.00040 | 0.00145  |
| 425 |    | 3S   | -0.00130 | 0.00100  | -0.00018 | 0.00153  | 0.01186  |
| 426 |    | 4PX  | 0.00011  | -0.00098 | -0.00004 | 0.00055  | 0.01031  |
| 427 |    | 4PY  | 0.00016  | -0.00082 | -0.00002 | 0.00072  | -0.02117 |
| 428 |    | 4PZ  | -0.00019 | 0.00039  | 0.00000  | -0.00038 | -0.00624 |
| 429 |    | 5PX  | 0.00020  | -0.00053 | 0.00049  | -0.00134 | -0.02994 |
| 430 |    | 5PY  | -0.00170 | 0.00035  | 0.00032  | -0.00050 | 0.07803  |
| 431 |    | 5PZ  | -0.00136 | 0.00179  | -0.00023 | 0.00007  | 0.03094  |
| 432 | 66 | H 1S | -0.00002 | -0.00011 | -0.00002 | 0.00020  | -0.02660 |
| 433 |    | 2S   | 0.00081  | -0.00045 | -0.00006 | 0.00029  | -0.08386 |
| 434 | 67 | H 1S | 0.00006  | 0.00003  | 0.00001  | -0.00015 | 0.02727  |
| 435 |    | 2S   | -0.00115 | 0.00066  | -0.00009 | 0.00011  | 0.08704  |
| 436 | 68 | C 1S | -0.00003 | 0.00006  | -0.00001 | -0.00002 | -0.00010 |
| 437 |    | 2S   | 0.00003  | -0.00001 | 0.00000  | -0.00004 | 0.00110  |
| 438 |    | 3S   | 0.00012  | -0.00154 | 0.00027  | 0.00020  | -0.00365 |
| 439 |    | 4PX  | -0.00001 | 0.00047  | 0.00003  | -0.00014 | 0.00004  |
| 440 |    | 4PY  | 0.00024  | 0.00035  | 0.00011  | -0.00013 | 0.00021  |
| 441 |    | 4PZ  | -0.00009 | 0.00025  | -0.00003 | -0.00009 | 0.00092  |

|     |    |      |          |          |          |          |          |
|-----|----|------|----------|----------|----------|----------|----------|
| 442 |    | 5PX  | -0.00205 | 0.00042  | 0.00025  | -0.00133 | 0.05938  |
| 443 |    | 5PY  | 0.00208  | -0.00048 | 0.00014  | -0.00038 | -0.11068 |
| 444 |    | 5PZ  | -0.00052 | -0.00008 | -0.00029 | 0.00011  | -0.02813 |
| 445 | 69 | H 1S | 0.00008  | 0.00003  | 0.00001  | -0.00003 | 0.00213  |
| 446 |    | 2S   | -0.00029 | 0.00048  | 0.00028  | -0.00001 | 0.05253  |
| 447 | 70 | H 1S | -0.00002 | -0.00008 | -0.00003 | 0.00006  | -0.00307 |
| 448 |    | 2S   | 0.00118  | -0.00020 | -0.00013 | 0.00035  | -0.06284 |
| 449 | 71 | C 1S | 0.00013  | -0.00003 | -0.00001 | 0.00003  | -0.00257 |
| 450 |    | 2S   | -0.00028 | 0.00004  | 0.00000  | -0.00016 | 0.00629  |
| 451 |    | 3S   | -0.00193 | 0.00023  | -0.00011 | 0.00043  | 0.02332  |
| 452 |    | 4PX  | -0.00040 | -0.00046 | 0.00002  | 0.00021  | 0.00757  |
| 453 |    | 4PY  | 0.00007  | -0.00022 | -0.00013 | 0.00010  | 0.00528  |
| 454 |    | 4PZ  | 0.00000  | 0.00012  | -0.00002 | -0.00005 | 0.00853  |
| 455 |    | 5PX  | 0.00108  | -0.00046 | 0.00120  | -0.00071 | -0.03116 |
| 456 |    | 5PY  | -0.00351 | -0.00050 | 0.00003  | -0.00067 | 0.07997  |
| 457 |    | 5PZ  | 0.00031  | 0.00022  | 0.00055  | -0.00026 | 0.03945  |
| 458 | 72 | H 1S | -0.00013 | 0.00000  | 0.00002  | -0.00004 | -0.00123 |
| 459 |    | 2S   | -0.00063 | 0.00007  | 0.00037  | -0.00015 | 0.04686  |
| 460 | 73 | H 1S | -0.00004 | 0.00001  | -0.00013 | -0.00004 | 0.00048  |
| 461 |    | 2S   | 0.00242  | 0.00013  | 0.00059  | 0.00016  | -0.04996 |
| 462 | 74 | C 1S | 0.00019  | 0.00009  | 0.00006  | -0.00002 | 0.00073  |
| 463 |    | 2S   | -0.00025 | -0.00016 | -0.00035 | 0.00001  | -0.00104 |
| 464 |    | 3S   | -0.00272 | -0.00100 | 0.00117  | 0.00021  | -0.00462 |
| 465 |    | 4PX  | -0.00005 | 0.00025  | -0.00015 | -0.00014 | -0.00312 |
| 466 |    | 4PY  | 0.00162  | 0.00052  | 0.00072  | -0.00001 | -0.00151 |
| 467 |    | 4PZ  | -0.00052 | -0.00004 | -0.00035 | -0.00007 | 0.00012  |
| 468 |    | 5PX  | -0.00086 | -0.00015 | 0.00102  | -0.00066 | 0.01838  |
| 469 |    | 5PY  | 0.00182  | 0.00039  | -0.00073 | 0.00016  | -0.02632 |
| 470 |    | 5PZ  | -0.00317 | -0.00095 | 0.00069  | -0.00034 | 0.00099  |
| 471 | 75 | H 1S | 0.00021  | 0.00004  | -0.00001 | 0.00000  | -0.00238 |
| 472 |    | 2S   | 0.00201  | 0.00065  | 0.00049  | 0.00007  | 0.00233  |
| 473 | 76 | H 1S | 0.00039  | 0.00019  | 0.00010  | -0.00005 | -0.00538 |
| 474 |    | 2S   | -0.00005 | 0.00015  | 0.00037  | 0.00019  | -0.00564 |
| 475 | 77 | C 1S | -0.00020 | -0.00005 | -0.00021 | -0.00001 | -0.00037 |
| 476 |    | 2S   | 0.00115  | 0.00031  | 0.00046  | -0.00004 | 0.00307  |
| 477 |    | 3S   | 0.00856  | 0.00224  | 0.00168  | 0.00049  | -0.02079 |
| 478 |    | 4PX  | -0.00043 | -0.00009 | 0.00034  | 0.00000  | 0.04192  |
| 479 |    | 4PY  | -0.00255 | -0.00071 | -0.00085 | -0.00004 | 0.02347  |
| 480 |    | 4PZ  | -0.00159 | -0.00042 | -0.00072 | -0.00002 | 0.00902  |
| 481 |    | 5PX  | -0.00056 | -0.00011 | 0.00144  | -0.00022 | 0.03036  |

|        |   |     |          |          |          |          |          |
|--------|---|-----|----------|----------|----------|----------|----------|
| 482    |   | 5PY | -0.00050 | 0.00011  | -0.00380 | 0.00040  | 0.00893  |
| 483    |   | 5PZ | 0.00467  | 0.00120  | 0.00098  | 0.00016  | 0.00435  |
| 484 78 | C | 1S  | -0.00024 | -0.00006 | 0.00028  | 0.00001  | 0.00038  |
| 485    |   | 2S  | 0.00038  | 0.00010  | -0.00046 | -0.00002 | -0.00132 |
| 486    |   | 3S  | 0.00686  | 0.00183  | -0.00750 | -0.00011 | -0.00462 |
| 487    |   | 4PX | 0.00954  | 0.00262  | 0.00257  | 0.00006  | -0.06563 |
| 488    |   | 4PY | 0.00397  | 0.00108  | 0.00180  | 0.00004  | -0.03103 |
| 489    |   | 4PZ | -0.00494 | -0.00136 | -0.00663 | -0.00017 | -0.01794 |
| 490    |   | 5PX | -0.01266 | -0.00339 | 0.00475  | -0.00010 | -0.05935 |
| 491    |   | 5PY | 0.00005  | -0.00001 | -0.00187 | 0.00030  | -0.03554 |
| 492    |   | 5PZ | 0.06884  | 0.01877  | 0.00047  | 0.00012  | -0.01358 |
| 493 79 | C | 1S  | -0.00039 | -0.00011 | -0.00127 | -0.00003 | -0.00002 |
| 494    |   | 2S  | 0.00046  | 0.00012  | 0.00109  | 0.00003  | -0.00112 |
| 495    |   | 3S  | 0.00806  | 0.00221  | 0.02924  | 0.00073  | 0.01376  |
| 496    |   | 4PX | -0.01561 | -0.00424 | -0.00035 | -0.00002 | 0.02581  |
| 497    |   | 4PY | -0.00858 | -0.00233 | -0.00636 | -0.00017 | 0.01513  |
| 498    |   | 4PZ | -0.00408 | -0.00111 | 0.00027  | 0.00000  | 0.00750  |
| 499    |   | 5PX | 0.00687  | 0.00180  | -0.00102 | -0.00001 | 0.03346  |
| 500    |   | 5PY | -0.05923 | -0.01608 | -0.01375 | -0.00037 | 0.01098  |
| 501    |   | 5PZ | 0.00253  | 0.00070  | 0.00109  | 0.00001  | 0.01171  |
| 502 80 | H | 1S  | 0.00187  | 0.00051  | 0.00175  | 0.00004  | 0.00042  |
| 503    |   | 2S  | 0.00891  | 0.00241  | -0.00007 | 0.00001  | 0.00111  |
| 504 81 | C | 1S  | 0.00266  | 0.00073  | 0.00310  | 0.00008  | -0.00017 |
| 505    |   | 2S  | -0.00434 | -0.00119 | -0.00614 | -0.00016 | 0.00095  |
| 506    |   | 3S  | -0.02648 | -0.00713 | -0.04054 | -0.00098 | -0.00424 |
| 507    |   | 4PX | -0.01626 | -0.00444 | -0.00399 | -0.00010 | 0.03637  |
| 508    |   | 4PY | -0.00115 | -0.00031 | 0.01016  | 0.00025  | 0.02092  |
| 509    |   | 4PZ | -0.01662 | -0.00455 | -0.01887 | -0.00047 | 0.00751  |
| 510    |   | 5PX | 0.04701  | 0.01285  | 0.01921  | 0.00046  | 0.03554  |
| 511    |   | 5PY | -0.05856 | -0.01599 | -0.01338 | -0.00029 | -0.00735 |
| 512    |   | 5PZ | 0.01616  | 0.00445  | -0.01190 | -0.00036 | 0.00159  |
| 513 82 | H | 1S  | -0.00387 | -0.00106 | -0.00765 | -0.00019 | 0.00089  |
| 514    |   | 2S  | -0.03371 | -0.00924 | 0.01050  | 0.00031  | -0.00148 |
| 515 83 | C | 1S  | -0.00509 | -0.00139 | -0.00260 | -0.00006 | -0.00161 |
| 516    |   | 2S  | 0.00800  | 0.00219  | 0.00486  | 0.00012  | 0.00507  |
| 517    |   | 3S  | 0.04374  | 0.01194  | 0.03344  | 0.00076  | 0.00656  |
| 518    |   | 4PX | 0.00935  | 0.00256  | 0.00620  | 0.00015  | 0.04093  |
| 519    |   | 4PY | -0.01692 | -0.00463 | -0.00772 | -0.00019 | 0.01831  |
| 520    |   | 4PZ | -0.01241 | -0.00339 | -0.01405 | -0.00035 | 0.01613  |
| 521    |   | 5PX | -0.05181 | -0.01417 | 0.00856  | 0.00017  | 0.02974  |

|        |   |     |          |          |          |          |          |
|--------|---|-----|----------|----------|----------|----------|----------|
| 522    |   | 5PY | 0.06126  | 0.01675  | 0.01357  | 0.00039  | 0.02797  |
| 523    |   | 5PZ | 0.00538  | 0.00148  | -0.02826 | -0.00067 | 0.00993  |
| 524 84 | H | 1S  | 0.00911  | 0.00249  | 0.00608  | 0.00015  | 0.00229  |
| 525    |   | 2S  | 0.02241  | 0.00614  | -0.02177 | -0.00048 | 0.00652  |
| 526 85 | C | 1S  | 0.00271  | 0.00074  | 0.00129  | 0.00003  | 0.00083  |
| 527    |   | 2S  | -0.00483 | -0.00132 | -0.00206 | -0.00006 | -0.00184 |
| 528    |   | 3S  | -0.02731 | -0.00751 | -0.02063 | -0.00036 | -0.01097 |
| 529    |   | 4PX | 0.01597  | 0.00439  | 0.00110  | 0.00001  | 0.01302  |
| 530    |   | 4PY | 0.02564  | 0.00703  | 0.00792  | 0.00019  | 0.01142  |
| 531    |   | 4PZ | 0.00618  | 0.00170  | 0.00156  | 0.00004  | 0.00361  |
| 532    |   | 5PX | -0.01292 | -0.00352 | -0.01035 | -0.00025 | 0.01347  |
| 533    |   | 5PY | 0.06272  | 0.01714  | 0.00744  | 0.00011  | 0.02130  |
| 534    |   | 5PZ | 0.01004  | 0.00274  | 0.01142  | 0.00040  | 0.00887  |
| 535 86 | H | 1S  | 0.00064  | 0.00018  | -0.00102 | -0.00003 | 0.00103  |
| 536    |   | 2S  | -0.00989 | -0.00270 | 0.00368  | 0.00017  | 0.00145  |

HOMO (#92) and LUMO(#93) for **6**:

|                |    |      | 181      | 182      | 183      | 184      | 185      |
|----------------|----|------|----------|----------|----------|----------|----------|
|                |    |      | (A)--O   | (A)--O   | (A)--O   | (A)--O   | (A)--V   |
| EIGENVALUES -- |    |      | -0.21233 | -0.21233 | -0.20762 | -0.20762 | -0.08597 |
| 1 1            | Zn | 1S   | 0.00038  | 0.00067  | 0.00056  | -0.00010 | 0.00310  |
| 2              |    | 2S   | 0.00122  | 0.00213  | 0.00444  | -0.00077 | -0.01253 |
| 3              |    | 3PX  | -0.00090 | -0.00157 | 0.00330  | -0.00056 | 0.02296  |
| 4              |    | 3PY  | 0.01394  | 0.02426  | 0.00336  | -0.00055 | -0.00815 |
| 5              |    | 3PZ  | -0.00119 | -0.00207 | 0.05278  | -0.00863 | 0.00908  |
| 6              |    | 4PX  | 0.00028  | 0.00048  | 0.01788  | -0.00295 | -0.00191 |
| 7              |    | 4PY  | 0.01162  | 0.02018  | -0.00045 | 0.00008  | -0.00213 |
| 8              |    | 4PZ  | 0.00041  | 0.00073  | -0.08912 | 0.01458  | -0.00006 |
| 9              |    | 5D 0 | -0.00198 | -0.00345 | 0.00696  | -0.00114 | -0.00394 |
| 10             |    | 5D+1 | -0.00161 | -0.00281 | 0.06134  | -0.01003 | -0.00617 |
| 11             |    | 5D-1 | 0.02835  | 0.04932  | 0.00305  | -0.00050 | -0.00347 |
| 12             |    | 5D+2 | -0.00081 | -0.00140 | -0.00647 | 0.00106  | -0.02569 |
| 13             |    | 5D-2 | 0.00494  | 0.00859  | 0.00071  | -0.00012 | -0.00513 |
| 14             |    | 6D 0 | -0.00029 | -0.00050 | 0.00045  | -0.00007 | -0.00005 |
| 15             |    | 6D+1 | -0.00024 | -0.00041 | 0.00709  | -0.00116 | -0.00079 |
| 16             |    | 6D-1 | 0.00374  | 0.00651  | 0.00036  | -0.00006 | -0.00040 |
| 17             |    | 6D+2 | -0.00023 | -0.00040 | -0.00102 | 0.00017  | -0.00337 |
| 18             |    | 6D-2 | 0.00140  | 0.00244  | 0.00018  | -0.00003 | -0.00086 |
| 19 2           | I  | 1S   | 0.00008  | 0.00014  | 0.00860  | -0.00141 | 0.00095  |
| 20             |    | 2S   | 0.00010  | 0.00017  | 0.03101  | -0.00508 | 0.00403  |

|    |   |      |          |          |          |          |          |
|----|---|------|----------|----------|----------|----------|----------|
| 21 |   | 3PX  | 0.01065  | 0.01852  | -0.17997 | 0.02944  | -0.00073 |
| 22 |   | 3PY  | -0.13057 | -0.22718 | -0.00945 | 0.00155  | 0.00050  |
| 23 |   | 3PZ  | 0.00551  | 0.00957  | -0.29539 | 0.04832  | -0.00741 |
| 24 |   | 4PX  | 0.01090  | 0.01897  | -0.18914 | 0.03094  | -0.00090 |
| 25 |   | 4PY  | -0.13535 | -0.23550 | -0.01046 | 0.00171  | 0.00225  |
| 26 |   | 4PZ  | 0.00565  | 0.00983  | -0.28300 | 0.04629  | -0.01041 |
| 27 | 3 | I 1S | -0.00007 | -0.00013 | -0.00811 | 0.00133  | 0.00202  |
| 28 |   | 2S   | -0.00028 | -0.00048 | -0.02747 | 0.00450  | 0.00794  |
| 29 |   | 3PX  | -0.00643 | -0.01118 | 0.31863  | -0.05212 | -0.00013 |
| 30 |   | 3PY  | 0.23040  | 0.40089  | 0.01889  | -0.00309 | 0.00315  |
| 31 |   | 3PZ  | 0.00051  | 0.00089  | -0.25657 | 0.04197  | 0.01400  |
| 32 |   | 4PX  | -0.00661 | -0.01150 | 0.32214  | -0.05269 | 0.00073  |
| 33 |   | 4PY  | 0.22654  | 0.39417  | 0.01872  | -0.00306 | 0.00379  |
| 34 |   | 4PZ  | -0.00010 | -0.00018 | -0.23910 | 0.03911  | 0.01891  |
| 35 | 4 | O 1S | 0.00008  | 0.00015  | 0.00006  | -0.00001 | 0.00036  |
| 36 |   | 2S   | -0.00010 | -0.00020 | -0.00006 | 0.00001  | -0.00180 |
| 37 |   | 3S   | -0.00127 | -0.00210 | -0.00099 | 0.00013  | 0.00189  |
| 38 |   | 4PX  | 0.00106  | 0.00187  | 0.00179  | -0.00030 | 0.06264  |
| 39 |   | 4PY  | 0.00182  | 0.00318  | -0.00009 | 0.00002  | -0.06669 |
| 40 |   | 4PZ  | -0.00112 | -0.00190 | 0.00079  | -0.00012 | 0.08881  |
| 41 |   | 5PX  | 0.00037  | 0.00069  | 0.00105  | -0.00015 | 0.04666  |
| 42 |   | 5PY  | 0.00037  | 0.00096  | -0.00027 | 0.00007  | -0.05271 |
| 43 |   | 5PZ  | -0.00121 | -0.00207 | 0.00019  | -0.00001 | 0.07423  |
| 44 | 5 | O 1S | 0.00007  | -0.00004 | -0.00001 | -0.00005 | 0.00000  |
| 45 |   | 2S   | 0.00000  | 0.00001  | 0.00001  | 0.00004  | 0.00041  |
| 46 |   | 3S   | -0.00230 | 0.00125  | 0.00010  | 0.00098  | -0.00226 |
| 47 |   | 4PX  | -0.00111 | 0.00062  | 0.00028  | 0.00172  | 0.03967  |
| 48 |   | 4PY  | 0.00218  | -0.00129 | 0.00004  | 0.00025  | 0.06312  |
| 49 |   | 4PZ  | 0.00064  | -0.00036 | -0.00002 | -0.00015 | 0.01153  |
| 50 |   | 5PX  | 0.00041  | -0.00025 | 0.00012  | 0.00061  | 0.03160  |
| 51 |   | 5PY  | 0.00041  | -0.00032 | 0.00002  | 0.00033  | 0.04930  |
| 52 |   | 5PZ  | 0.00135  | -0.00070 | 0.00000  | -0.00019 | 0.00963  |
| 53 | 6 | N 1S | 0.00223  | 0.00389  | 0.00103  | -0.00017 | 0.00219  |
| 54 |   | 2S   | -0.00482 | -0.00839 | -0.00236 | 0.00038  | -0.00617 |
| 55 |   | 3S   | -0.01121 | -0.01945 | -0.00287 | 0.00047  | -0.00965 |
| 56 |   | 4PX  | 0.01038  | 0.01807  | 0.00711  | -0.00116 | 0.15713  |
| 57 |   | 4PY  | 0.00416  | 0.00722  | -0.00073 | 0.00012  | -0.12953 |
| 58 |   | 4PZ  | 0.00359  | 0.00626  | -0.00038 | 0.00006  | 0.05901  |
| 59 |   | 5PX  | 0.00588  | 0.01029  | 0.00948  | -0.00155 | 0.14019  |
| 60 |   | 5PY  | 0.00873  | 0.01521  | 0.00414  | -0.00070 | -0.12433 |

|     |    |      |          |          |          |          |          |
|-----|----|------|----------|----------|----------|----------|----------|
| 61  |    | 5PZ  | 0.01507  | 0.02623  | -0.00005 | 0.00000  | 0.05022  |
| 62  | 7  | N 1S | 0.00002  | 0.00005  | -0.00016 | 0.00003  | 0.00040  |
| 63  |    | 2S   | -0.00017 | -0.00037 | 0.00003  | -0.00002 | -0.00121 |
| 64  |    | 3S   | 0.00186  | 0.00367  | 0.00384  | -0.00057 | -0.01227 |
| 65  |    | 4PX  | 0.00181  | 0.00317  | -0.00079 | 0.00013  | -0.01823 |
| 66  |    | 4PY  | -0.00097 | -0.00171 | 0.00039  | -0.00008 | 0.01947  |
| 67  |    | 4PZ  | 0.00000  | 0.00003  | -0.00205 | 0.00035  | -0.01868 |
| 68  |    | 5PX  | -0.00304 | -0.00570 | -0.00340 | 0.00044  | -0.00716 |
| 69  |    | 5PY  | 0.00109  | 0.00142  | -0.00006 | -0.00007 | 0.02298  |
| 70  |    | 5PZ  | 0.00672  | 0.01185  | -0.00108 | 0.00023  | -0.06366 |
| 71  | 8  | H 1S | -0.00086 | -0.00150 | -0.00113 | 0.00019  | 0.01678  |
| 72  |    | 2S   | -0.00523 | -0.00933 | -0.00302 | 0.00040  | 0.06175  |
| 73  | 9  | N 1S | -0.00011 | 0.00006  | 0.00002  | 0.00014  | -0.00083 |
| 74  |    | 2S   | -0.00028 | 0.00017  | -0.00001 | -0.00011 | 0.00122  |
| 75  |    | 3S   | 0.00629  | -0.00377 | -0.00051 | -0.00282 | 0.01223  |
| 76  |    | 4PX  | -0.00094 | 0.00055  | -0.00015 | -0.00092 | -0.01508 |
| 77  |    | 4PY  | -0.00125 | 0.00071  | -0.00014 | -0.00088 | -0.02173 |
| 78  |    | 4PZ  | 0.00154  | -0.00089 | -0.00021 | -0.00130 | -0.00515 |
| 79  |    | 5PX  | 0.00381  | -0.00221 | -0.00029 | -0.00068 | -0.02216 |
| 80  |    | 5PY  | -0.00113 | 0.00071  | -0.00009 | -0.00133 | -0.03326 |
| 81  |    | 5PZ  | -0.01389 | 0.00787  | 0.00004  | -0.00007 | -0.01380 |
| 82  | 10 | H 1S | -0.00141 | 0.00081  | 0.00019  | 0.00115  | -0.00254 |
| 83  |    | 2S   | -0.01036 | 0.00591  | 0.00072  | 0.00398  | -0.00981 |
| 84  | 11 | N 1S | 0.00262  | -0.00150 | -0.00009 | -0.00055 | -0.00478 |
| 85  |    | 2S   | -0.00566 | 0.00325  | 0.00022  | 0.00131  | 0.01177  |
| 86  |    | 3S   | -0.01268 | 0.00726  | 0.00010  | 0.00070  | 0.02940  |
| 87  |    | 4PX  | -0.01306 | 0.00750  | 0.00030  | 0.00180  | 0.09182  |
| 88  |    | 4PY  | 0.00388  | -0.00223 | -0.00042 | -0.00254 | 0.08361  |
| 89  |    | 4PZ  | -0.00320 | 0.00184  | -0.00043 | -0.00261 | 0.00899  |
| 90  |    | 5PX  | -0.01424 | 0.00820  | 0.00036  | 0.00216  | 0.08551  |
| 91  |    | 5PY  | 0.00732  | -0.00423 | -0.00081 | -0.00496 | 0.08610  |
| 92  |    | 5PZ  | -0.02555 | 0.01468  | -0.00051 | -0.00301 | 0.00579  |
| 93  | 12 | C 1S | -0.00234 | -0.00407 | -0.00297 | 0.00049  | -0.00042 |
| 94  |    | 2S   | 0.00350  | 0.00609  | 0.00580  | -0.00095 | 0.00082  |
| 95  |    | 3S   | 0.01965  | 0.03435  | 0.03861  | -0.00626 | 0.00368  |
| 96  |    | 4PX  | -0.00527 | -0.00917 | -0.01144 | 0.00187  | -0.09212 |
| 97  |    | 4PY  | -0.00694 | -0.01205 | -0.00621 | 0.00102  | 0.08219  |
| 98  |    | 4PZ  | 0.00464  | 0.00808  | 0.01590  | -0.00260 | -0.03656 |
| 99  |    | 5PX  | 0.02893  | 0.05023  | -0.00695 | 0.00113  | -0.06141 |
| 100 |    | 5PY  | 0.02377  | 0.04133  | 0.01336  | -0.00219 | 0.05203  |

|     |    |      |          |          |          |          |          |
|-----|----|------|----------|----------|----------|----------|----------|
| 101 |    | 5PZ  | 0.00652  | 0.01145  | 0.02991  | -0.00489 | -0.02692 |
| 102 | 13 | H 1S | 0.00389  | 0.00677  | 0.00689  | -0.00113 | 0.00254  |
| 103 |    | 2S   | 0.00989  | 0.01707  | -0.02180 | 0.00355  | 0.00513  |
| 104 | 14 | C 1S | 0.00124  | 0.00217  | 0.00134  | -0.00022 | -0.00064 |
| 105 |    | 2S   | -0.00221 | -0.00382 | -0.00212 | 0.00035  | 0.00102  |
| 106 |    | 3S   | -0.01638 | -0.02865 | -0.02358 | 0.00379  | 0.00579  |
| 107 |    | 4PX  | -0.00308 | -0.00539 | 0.00433  | -0.00072 | -0.06960 |
| 108 |    | 4PY  | 0.01158  | 0.02016  | 0.00537  | -0.00088 | 0.07005  |
| 109 |    | 4PZ  | -0.00236 | -0.00410 | 0.00011  | -0.00002 | -0.03616 |
| 110 |    | 5PX  | 0.01550  | 0.02713  | 0.01407  | -0.00228 | -0.08725 |
| 111 |    | 5PY  | 0.02599  | 0.04538  | 0.00427  | -0.00066 | 0.08595  |
| 112 |    | 5PZ  | -0.00859 | -0.01476 | -0.01309 | 0.00220  | -0.04578 |
| 113 | 15 | H 1S | 0.00020  | 0.00035  | -0.00142 | 0.00023  | -0.00098 |
| 114 |    | 2S   | -0.00074 | -0.00144 | 0.00580  | -0.00099 | 0.00114  |
| 115 | 16 | C 1S | 0.00012  | 0.00022  | 0.00043  | -0.00007 | 0.00045  |
| 116 |    | 2S   | -0.00026 | -0.00042 | -0.00057 | 0.00010  | -0.00019 |
| 117 |    | 3S   | -0.00285 | -0.00562 | -0.01063 | 0.00164  | -0.01012 |
| 118 |    | 4PX  | -0.00351 | -0.00609 | -0.00192 | 0.00032  | 0.18251  |
| 119 |    | 4PY  | 0.00296  | 0.00514  | 0.00151  | -0.00025 | -0.16669 |
| 120 |    | 4PZ  | 0.00248  | 0.00431  | 0.00841  | -0.00138 | 0.07973  |
| 121 |    | 5PX  | 0.00694  | 0.01127  | -0.00373 | 0.00046  | 0.18801  |
| 122 |    | 5PY  | -0.00425 | -0.00803 | -0.00265 | 0.00030  | -0.14294 |
| 123 |    | 5PZ  | -0.02940 | -0.05125 | 0.00153  | -0.00025 | 0.09425  |
| 124 | 17 | C 1S | -0.00052 | -0.00091 | -0.00158 | 0.00026  | 0.00037  |
| 125 |    | 2S   | 0.00026  | 0.00046  | 0.00177  | -0.00029 | -0.00427 |
| 126 |    | 3S   | 0.01445  | 0.02517  | 0.03278  | -0.00534 | 0.03651  |
| 127 |    | 4PX  | 0.00542  | 0.00943  | -0.00291 | 0.00047  | -0.04929 |
| 128 |    | 4PY  | -0.00698 | -0.01212 | -0.00673 | 0.00111  | 0.04966  |
| 129 |    | 4PZ  | 0.00235  | 0.00408  | -0.00104 | 0.00017  | -0.02812 |
| 130 |    | 5PX  | -0.01224 | -0.02121 | -0.00561 | 0.00090  | -0.06595 |
| 131 |    | 5PY  | -0.02621 | -0.04558 | -0.01080 | 0.00175  | 0.05623  |
| 132 |    | 5PZ  | -0.00474 | -0.00831 | -0.00627 | 0.00101  | -0.03330 |
| 133 | 18 | H 1S | 0.00103  | 0.00180  | 0.00224  | -0.00037 | 0.00021  |
| 134 |    | 2S   | 0.00383  | 0.00653  | -0.00114 | 0.00017  | -0.01375 |
| 135 | 19 | C 1S | 0.00177  | 0.00308  | 0.00390  | -0.00064 | -0.00098 |
| 136 |    | 2S   | -0.00243 | -0.00420 | -0.00704 | 0.00116  | 0.00377  |
| 137 |    | 3S   | -0.01826 | -0.03182 | -0.05283 | 0.00859  | -0.01902 |
| 138 |    | 4PX  | 0.00522  | 0.00908  | 0.00292  | -0.00048 | -0.11697 |
| 139 |    | 4PY  | 0.00077  | 0.00134  | 0.01263  | -0.00206 | 0.11047  |
| 140 |    | 4PZ  | 0.01017  | 0.01770  | 0.02384  | -0.00390 | -0.04728 |



|     |    |      |          |          |          |          |          |
|-----|----|------|----------|----------|----------|----------|----------|
| 141 |    | 5PX  | -0.03068 | -0.05345 | -0.01808 | 0.00294  | -0.08924 |
| 142 |    | 5PY  | -0.02954 | -0.05155 | -0.00867 | 0.00139  | 0.08474  |
| 143 |    | 5PZ  | -0.01015 | -0.01783 | 0.01817  | -0.00299 | -0.01825 |
| 144 | 20 | H 1S | -0.00239 | -0.00415 | -0.00835 | 0.00137  | 0.00119  |
| 145 |    | 2S   | -0.01716 | -0.03001 | 0.01857  | -0.00305 | 0.01422  |
| 146 | 21 | C 1S | -0.00020 | -0.00033 | -0.00027 | 0.00005  | 0.00504  |
| 147 |    | 2S   | 0.00052  | 0.00105  | 0.00047  | -0.00005 | -0.01223 |
| 148 |    | 3S   | 0.00635  | 0.00960  | 0.00306  | -0.00071 | -0.07323 |
| 149 |    | 4PX  | -0.00085 | -0.00148 | -0.00152 | 0.00024  | -0.06920 |
| 150 |    | 4PY  | -0.00085 | -0.00146 | 0.00004  | 0.00000  | 0.09379  |
| 151 |    | 4PZ  | 0.00093  | 0.00164  | -0.00002 | 0.00000  | -0.12756 |
| 152 |    | 5PX  | -0.00174 | -0.00366 | -0.00312 | 0.00033  | -0.01852 |
| 153 |    | 5PY  | -0.00067 | -0.00220 | -0.00308 | 0.00029  | 0.04995  |
| 154 |    | 5PZ  | -0.00061 | -0.00108 | -0.00087 | 0.00008  | -0.07932 |
| 155 | 22 | C 1S | 0.00010  | 0.00022  | 0.00006  | 0.00001  | -0.00049 |
| 156 |    | 2S   | -0.00022 | -0.00040 | -0.00033 | 0.00004  | -0.00077 |
| 157 |    | 3S   | -0.00128 | -0.00213 | 0.00112  | -0.00052 | 0.02882  |
| 158 |    | 4PX  | 0.00037  | 0.00042  | 0.00040  | -0.00020 | 0.00393  |
| 159 |    | 4PY  | 0.00098  | 0.00169  | 0.00055  | -0.00008 | -0.01907 |
| 160 |    | 4PZ  | 0.00018  | 0.00038  | 0.00056  | -0.00005 | 0.00976  |
| 161 |    | 5PX  | 0.00181  | 0.00019  | -0.00098 | -0.00041 | -0.04974 |
| 162 |    | 5PY  | 0.00006  | -0.00035 | -0.00100 | -0.00005 | 0.01042  |
| 163 |    | 5PZ  | 0.00217  | 0.00290  | 0.00070  | 0.00015  | -0.01873 |
| 164 | 23 | H 1S | 0.00000  | 0.00002  | 0.00022  | -0.00003 | 0.01940  |
| 165 |    | 2S   | -0.00080 | -0.00132 | -0.00007 | -0.00021 | 0.03985  |
| 166 | 24 | H 1S | 0.00014  | 0.00038  | -0.00015 | 0.00007  | -0.02540 |
| 167 |    | 2S   | 0.00172  | 0.00149  | 0.00019  | -0.00009 | -0.07537 |
| 168 | 25 | C 1S | 0.00003  | -0.00001 | -0.00002 | -0.00003 | -0.00184 |
| 169 |    | 2S   | -0.00028 | -0.00007 | -0.00004 | 0.00012  | 0.00193  |
| 170 |    | 3S   | 0.00084  | 0.00009  | 0.00015  | -0.00002 | 0.02623  |
| 171 |    | 4PX  | -0.00020 | 0.00003  | -0.00010 | 0.00019  | -0.00771 |
| 172 |    | 4PY  | 0.00003  | -0.00024 | -0.00009 | -0.00012 | -0.00175 |
| 173 |    | 4PZ  | 0.00010  | 0.00025  | -0.00001 | 0.00003  | 0.00279  |
| 174 |    | 5PX  | -0.00098 | -0.00315 | -0.00167 | -0.00065 | 0.02111  |
| 175 |    | 5PY  | -0.00201 | -0.00051 | -0.00032 | 0.00007  | -0.00543 |
| 176 |    | 5PZ  | -0.00167 | -0.00074 | 0.00027  | 0.00007  | 0.02697  |
| 177 | 26 | H 1S | -0.00005 | 0.00001  | 0.00007  | 0.00003  | 0.00200  |
| 178 |    | 2S   | -0.00088 | -0.00015 | 0.00051  | -0.00010 | 0.01070  |
| 179 | 27 | H 1S | -0.00017 | -0.00021 | -0.00012 | 0.00003  | 0.00094  |
| 180 |    | 2S   | 0.00128  | 0.00068  | 0.00056  | 0.00002  | -0.00634 |

|     |    |   |     |          |          |          |          |          |
|-----|----|---|-----|----------|----------|----------|----------|----------|
| 181 | 28 | C | 1S  | -0.00002 | -0.00002 | 0.00002  | 0.00001  | 0.00396  |
| 182 |    |   | 2S  | -0.00011 | 0.00011  | -0.00005 | 0.00004  | -0.00448 |
| 183 |    |   | 3S  | 0.00063  | -0.00020 | -0.00038 | -0.00023 | -0.07936 |
| 184 |    |   | 4PX | -0.00003 | -0.00009 | 0.00009  | -0.00019 | -0.00463 |
| 185 |    |   | 4PY | 0.00000  | 0.00021  | 0.00003  | 0.00001  | -0.00576 |
| 186 |    |   | 4PZ | -0.00009 | -0.00006 | 0.00004  | 0.00001  | 0.00862  |
| 187 |    |   | 5PX | 0.00299  | -0.00089 | -0.00034 | -0.00047 | -0.02467 |
| 188 |    |   | 5PY | 0.00160  | 0.00111  | 0.00052  | 0.00035  | 0.01483  |
| 189 |    |   | 5PZ | 0.00103  | -0.00072 | -0.00026 | 0.00033  | 0.01389  |
| 190 | 29 | H | 1S  | 0.00000  | -0.00001 | 0.00000  | -0.00006 | -0.00081 |
| 191 |    |   | 2S  | -0.00038 | 0.00023  | 0.00026  | -0.00050 | 0.00221  |
| 192 | 30 | H | 1S  | -0.00004 | -0.00010 | -0.00006 | 0.00003  | 0.00241  |
| 193 |    |   | 2S  | 0.00181  | 0.00047  | 0.00043  | -0.00007 | 0.02603  |
| 194 | 31 | C | 1S  | 0.00008  | -0.00005 | -0.00002 | -0.00005 | -0.00017 |
| 195 |    |   | 2S  | -0.00034 | 0.00024  | 0.00006  | 0.00029  | -0.00056 |
| 196 |    |   | 3S  | 0.00039  | -0.00092 | -0.00028 | -0.00146 | 0.00103  |
| 197 |    |   | 4PX | -0.00063 | 0.00039  | 0.00006  | 0.00063  | 0.00085  |
| 198 |    |   | 4PY | 0.00058  | -0.00031 | -0.00003 | -0.00027 | 0.01139  |
| 199 |    |   | 4PZ | -0.00060 | 0.00038  | 0.00014  | 0.00060  | 0.00342  |
| 200 |    |   | 5PX | 0.00088  | -0.00144 | -0.00088 | -0.00151 | -0.02994 |
| 201 |    |   | 5PY | -0.00181 | 0.00097  | 0.00030  | 0.00025  | -0.02827 |
| 202 |    |   | 5PZ | -0.00120 | -0.00014 | -0.00022 | -0.00006 | 0.01686  |
| 203 | 32 | H | 1S  | 0.00008  | -0.00006 | 0.00001  | 0.00007  | 0.01625  |
| 204 |    |   | 2S  | 0.00126  | -0.00043 | 0.00006  | 0.00015  | 0.05793  |
| 205 | 33 | H | 1S  | 0.00005  | -0.00003 | -0.00002 | -0.00012 | -0.00863 |
| 206 |    |   | 2S  | 0.00001  | -0.00052 | -0.00018 | -0.00041 | -0.00535 |
| 207 | 34 | C | 1S  | -0.00022 | 0.00011  | 0.00004  | 0.00025  | -0.00059 |
| 208 |    |   | 2S  | 0.00080  | -0.00054 | -0.00018 | -0.00066 | 0.00081  |
| 209 |    |   | 3S  | 0.00882  | -0.00392 | 0.00040  | -0.00044 | 0.00878  |
| 210 |    |   | 4PX | 0.00125  | -0.00074 | -0.00019 | -0.00129 | -0.04609 |
| 211 |    |   | 4PY | -0.00077 | 0.00047  | 0.00000  | 0.00008  | -0.08352 |
| 212 |    |   | 4PZ | -0.00082 | 0.00046  | 0.00011  | 0.00059  | -0.01556 |
| 213 |    |   | 5PX | 0.00591  | -0.00380 | -0.00083 | -0.00203 | -0.02843 |
| 214 |    |   | 5PY | -0.00315 | 0.00221  | 0.00061  | 0.00195  | -0.03633 |
| 215 |    |   | 5PZ | 0.00209  | -0.00128 | -0.00024 | -0.00193 | -0.00617 |
| 216 | 35 | C | 1S  | 0.00050  | -0.00029 | -0.00005 | -0.00034 | 0.00070  |
| 217 |    |   | 2S  | -0.00126 | 0.00072  | 0.00007  | 0.00052  | -0.00128 |
| 218 |    |   | 3S  | -0.00816 | 0.00482  | 0.00101  | 0.00531  | -0.01384 |
| 219 |    |   | 4PX | 0.00106  | -0.00062 | 0.00000  | -0.00006 | 0.09317  |
| 220 |    |   | 4PY | 0.00177  | -0.00101 | 0.00013  | 0.00083  | 0.12653  |

|     |    |      |          |          |          |          |          |
|-----|----|------|----------|----------|----------|----------|----------|
| 221 |    | 4PZ  | -0.00744 | 0.00428  | 0.00145  | 0.00888  | 0.00756  |
| 222 |    | 5PX  | -0.00289 | 0.00139  | -0.00047 | -0.00063 | 0.08620  |
| 223 |    | 5PY  | -0.00209 | 0.00132  | 0.00037  | 0.00080  | 0.12373  |
| 224 |    | 5PZ  | 0.05360  | -0.03067 | 0.00074  | 0.00430  | 0.02588  |
| 225 | 36 | C 1S | -0.00144 | 0.00083  | 0.00026  | 0.00158  | -0.00101 |
| 226 |    | 2S   | 0.00129  | -0.00073 | -0.00037 | -0.00223 | 0.00341  |
| 227 |    | 3S   | 0.03147  | -0.01823 | -0.00481 | -0.02919 | -0.01302 |
| 228 |    | 4PX  | -0.00318 | 0.00184  | -0.00109 | -0.00666 | -0.01678 |
| 229 |    | 4PY  | -0.01379 | 0.00792  | 0.00047  | 0.00287  | -0.02909 |
| 230 |    | 4PZ  | 0.00116  | -0.00067 | -0.00031 | -0.00187 | -0.00310 |
| 231 |    | 5PX  | 0.03562  | -0.02051 | -0.00160 | -0.00972 | -0.02143 |
| 232 |    | 5PY  | -0.03856 | 0.02220  | 0.00052  | 0.00307  | -0.04081 |
| 233 |    | 5PZ  | 0.01205  | -0.00694 | -0.00132 | -0.00782 | -0.01389 |
| 234 | 37 | H 1S | 0.00185  | -0.00107 | -0.00037 | -0.00227 | -0.00154 |
| 235 |    | 2S   | 0.00777  | -0.00444 | 0.00035  | 0.00191  | 0.00782  |
| 236 | 38 | C 1S | 0.00408  | -0.00235 | -0.00063 | -0.00387 | 0.00110  |
| 237 |    | 2S   | -0.00568 | 0.00325  | 0.00115  | 0.00709  | -0.00361 |
| 238 |    | 3S   | -0.04630 | 0.02671  | 0.00858  | 0.05198  | 0.01016  |
| 239 |    | 4PX  | -0.01141 | 0.00656  | 0.00116  | 0.00711  | -0.07040 |
| 240 |    | 4PY  | 0.00317  | -0.00182 | -0.00141 | -0.00860 | -0.08592 |
| 241 |    | 4PZ  | -0.02001 | 0.01150  | 0.00410  | 0.02509  | -0.00630 |
| 242 |    | 5PX  | 0.06376  | -0.03670 | -0.00142 | -0.00838 | -0.05504 |
| 243 |    | 5PY  | -0.04303 | 0.02479  | 0.00153  | 0.00909  | -0.06895 |
| 244 |    | 5PZ  | 0.01525  | -0.00881 | 0.00379  | 0.02351  | 0.01319  |
| 245 | 39 | H 1S | -0.00575 | 0.00330  | 0.00136  | 0.00836  | -0.00404 |
| 246 |    | 2S   | -0.02361 | 0.01361  | -0.00375 | -0.02317 | -0.01703 |
| 247 | 40 | C 1S | -0.00347 | 0.00200  | 0.00048  | 0.00295  | 0.00032  |
| 248 |    | 2S   | 0.00488  | -0.00280 | -0.00094 | -0.00575 | -0.00016 |
| 249 |    | 3S   | 0.03038  | -0.01750 | -0.00657 | -0.03973 | 0.00401  |
| 250 |    | 4PX  | 0.01096  | -0.00630 | -0.00183 | -0.01121 | -0.04758 |
| 251 |    | 4PY  | -0.00671 | 0.00386  | 0.00102  | 0.00625  | -0.06206 |
| 252 |    | 4PZ  | -0.00652 | 0.00375  | 0.00286  | 0.01747  | -0.00779 |
| 253 |    | 5PX  | -0.05480 | 0.03144  | 0.00025  | 0.00184  | -0.03549 |
| 254 |    | 5PY  | 0.03025  | -0.01737 | -0.00152 | -0.00947 | -0.03108 |
| 255 |    | 5PZ  | -0.01357 | 0.00787  | 0.00474  | 0.02876  | -0.01336 |
| 256 | 41 | H 1S | 0.00599  | -0.00345 | -0.00118 | -0.00720 | -0.00268 |
| 257 |    | 2S   | 0.01705  | -0.00973 | 0.00338  | 0.02028  | -0.00462 |
| 258 | 42 | C 1S | 0.00184  | -0.00106 | -0.00024 | -0.00143 | -0.00081 |
| 259 |    | 2S   | -0.00317 | 0.00181  | 0.00032  | 0.00202  | 0.00149  |
| 260 |    | 3S   | -0.02532 | 0.01468  | 0.00446  | 0.02645  | 0.00915  |

|     |    |       |          |          |          |          |          |
|-----|----|-------|----------|----------|----------|----------|----------|
| 261 |    | 4PX   | 0.00073  | -0.00042 | 0.00118  | 0.00726  | -0.03271 |
| 262 |    | 4PY   | 0.01739  | -0.01000 | -0.00026 | -0.00160 | -0.05224 |
| 263 |    | 4PZ   | -0.00014 | 0.00008  | 0.00011  | 0.00064  | -0.00417 |
| 264 |    | 5PX   | -0.03518 | 0.02026  | 0.00203  | 0.01213  | -0.05491 |
| 265 |    | 5PY   | 0.03990  | -0.02294 | -0.00043 | -0.00244 | -0.06107 |
| 266 |    | 5PZ   | 0.01261  | -0.00721 | -0.00159 | -0.01038 | 0.00051  |
| 267 | 43 | H 1S  | 0.00019  | -0.00011 | 0.00024  | 0.00150  | -0.00178 |
| 268 |    | 2S    | -0.00066 | 0.00040  | -0.00061 | -0.00412 | -0.00332 |
| 269 | 44 | Zn 1S | -0.00067 | 0.00038  | -0.00009 | -0.00056 | -0.00387 |
| 270 |    | 2S    | -0.00212 | 0.00122  | -0.00069 | -0.00445 | 0.01562  |
| 271 |    | 3PX   | -0.00157 | 0.00090  | 0.00052  | 0.00331  | 0.02873  |
| 272 |    | 3PY   | 0.02427  | -0.01395 | 0.00055  | 0.00336  | -0.01019 |
| 273 |    | 3PZ   | -0.00207 | 0.00119  | 0.00864  | 0.05278  | 0.01136  |
| 274 |    | 4PX   | 0.00048  | -0.00028 | 0.00290  | 0.01789  | -0.00233 |
| 275 |    | 4PY   | 0.02021  | -0.01159 | -0.00007 | -0.00045 | -0.00277 |
| 276 |    | 4PZ   | 0.00073  | -0.00042 | -0.01457 | -0.08912 | -0.00017 |
| 277 |    | 5D 0  | 0.00345  | -0.00198 | -0.00114 | -0.00696 | 0.00493  |
| 278 |    | 5D+1  | 0.00281  | -0.00161 | -0.01003 | -0.06134 | 0.00772  |
| 279 |    | 5D-1  | -0.04932 | 0.02835  | -0.00050 | -0.00305 | 0.00435  |
| 280 |    | 5D+2  | 0.00140  | -0.00081 | 0.00106  | 0.00647  | 0.03212  |
| 281 |    | 5D-2  | -0.00860 | 0.00494  | -0.00012 | -0.00071 | 0.00645  |
| 282 |    | 6D 0  | 0.00050  | -0.00029 | -0.00007 | -0.00045 | 0.00007  |
| 283 |    | 6D+1  | 0.00041  | -0.00024 | -0.00116 | -0.00709 | 0.00098  |
| 284 |    | 6D-1  | -0.00650 | 0.00374  | -0.00006 | -0.00036 | 0.00050  |
| 285 |    | 6D+2  | 0.00040  | -0.00023 | 0.00017  | 0.00102  | 0.00421  |
| 286 |    | 6D-2  | -0.00244 | 0.00140  | -0.00003 | -0.00018 | 0.00107  |
| 287 | 45 | I 1S  | -0.00014 | 0.00008  | -0.00141 | -0.00861 | -0.00120 |
| 288 |    | 2S    | -0.00017 | 0.00010  | -0.00507 | -0.03102 | -0.00507 |
| 289 |    | 3PX   | 0.01852  | -0.01064 | -0.02943 | -0.17995 | -0.00092 |
| 290 |    | 3PY   | -0.22714 | 0.13054  | -0.00155 | -0.00945 | 0.00065  |
| 291 |    | 3PZ   | 0.00958  | -0.00550 | -0.04831 | -0.29538 | -0.00927 |
| 292 |    | 4PX   | 0.01897  | -0.01090 | -0.03093 | -0.18912 | -0.00115 |
| 293 |    | 4PY   | -0.23546 | 0.13533  | -0.00171 | -0.01047 | 0.00285  |
| 294 |    | 4PZ   | 0.00984  | -0.00565 | -0.04629 | -0.28299 | -0.01301 |
| 295 | 46 | I 1S  | 0.00013  | -0.00007 | 0.00133  | 0.00811  | -0.00252 |
| 296 |    | 2S    | 0.00048  | -0.00027 | 0.00449  | 0.02747  | -0.00991 |
| 297 |    | 3PX   | -0.01119 | 0.00643  | 0.05212  | 0.31863  | -0.00016 |
| 298 |    | 3PY   | 0.40091  | -0.23042 | 0.00310  | 0.01890  | 0.00395  |
| 299 |    | 3PZ   | 0.00089  | -0.00051 | -0.04197 | -0.25659 | 0.01752  |
| 300 |    | 4PX   | -0.01151 | 0.00661  | 0.05269  | 0.32215  | 0.00091  |

|     |    |      |          |          |          |          |          |
|-----|----|------|----------|----------|----------|----------|----------|
| 301 |    | 4PY  | 0.39419  | -0.22655 | 0.00307  | 0.01872  | 0.00474  |
| 302 |    | 4PZ  | -0.00017 | 0.00010  | -0.03911 | -0.23912 | 0.02366  |
| 303 | 47 | O 1S | -0.00015 | 0.00009  | -0.00001 | -0.00005 | -0.00040 |
| 304 |    | 2S   | 0.00019  | -0.00012 | 0.00001  | 0.00006  | 0.00226  |
| 305 |    | 3S   | 0.00215  | -0.00118 | 0.00019  | 0.00098  | -0.00325 |
| 306 |    | 4PX  | 0.00185  | -0.00108 | 0.00029  | 0.00179  | 0.07863  |
| 307 |    | 4PY  | 0.00317  | -0.00183 | -0.00001 | -0.00009 | -0.08361 |
| 308 |    | 4PZ  | -0.00192 | 0.00107  | 0.00014  | 0.00078  | 0.11133  |
| 309 |    | 5PX  | 0.00067  | -0.00041 | 0.00019  | 0.00105  | 0.05840  |
| 310 |    | 5PY  | 0.00080  | -0.00065 | -0.00002 | -0.00028 | -0.06568 |
| 311 |    | 5PZ  | -0.00209 | 0.00118  | 0.00005  | 0.00018  | 0.09284  |
| 312 | 48 | O 1S | -0.00004 | -0.00007 | 0.00005  | -0.00001 | -0.00004 |
| 313 |    | 2S   | -0.00001 | 0.00001  | -0.00004 | 0.00000  | -0.00022 |
| 314 |    | 3S   | 0.00136  | 0.00224  | -0.00096 | 0.00021  | 0.00178  |
| 315 |    | 4PX  | -0.00064 | -0.00110 | 0.00172  | -0.00028 | 0.03192  |
| 316 |    | 4PY  | 0.00123  | 0.00221  | 0.00025  | -0.00004 | 0.05101  |
| 317 |    | 4PZ  | 0.00037  | 0.00063  | -0.00015 | 0.00003  | 0.00927  |
| 318 |    | 5PX  | 0.00023  | 0.00042  | 0.00062  | -0.00008 | 0.02557  |
| 319 |    | 5PY  | 0.00019  | 0.00048  | 0.00032  | -0.00009 | 0.03992  |
| 320 |    | 5PZ  | 0.00081  | 0.00129  | -0.00018 | 0.00006  | 0.00735  |
| 321 | 49 | N 1S | -0.00389 | 0.00223  | -0.00017 | -0.00103 | -0.00273 |
| 322 |    | 2S   | 0.00839  | -0.00483 | 0.00039  | 0.00236  | 0.00771  |
| 323 |    | 3S   | 0.01948  | -0.01116 | 0.00047  | 0.00287  | 0.01196  |
| 324 |    | 4PX  | 0.01807  | -0.01040 | 0.00117  | 0.00711  | 0.19663  |
| 325 |    | 4PY  | 0.00723  | -0.00414 | -0.00012 | -0.00073 | -0.16213 |
| 326 |    | 4PZ  | 0.00625  | -0.00360 | -0.00006 | -0.00038 | 0.07384  |
| 327 |    | 5PX  | 0.01027  | -0.00593 | 0.00155  | 0.00948  | 0.17550  |
| 328 |    | 5PY  | 0.01520  | -0.00875 | 0.00066  | 0.00415  | -0.15553 |
| 329 |    | 5PZ  | 0.02623  | -0.01508 | -0.00002 | -0.00004 | 0.06289  |
| 330 | 50 | N 1S | -0.00004 | 0.00003  | 0.00002  | 0.00016  | -0.00050 |
| 331 |    | 2S   | 0.00034  | -0.00023 | 0.00001  | -0.00004 | 0.00153  |
| 332 |    | 3S   | -0.00345 | 0.00224  | -0.00068 | -0.00383 | 0.01502  |
| 333 |    | 4PX  | 0.00316  | -0.00183 | -0.00013 | -0.00079 | -0.02282 |
| 334 |    | 4PY  | -0.00170 | 0.00099  | 0.00005  | 0.00040  | 0.02440  |
| 335 |    | 4PZ  | 0.00001  | -0.00002 | -0.00033 | -0.00206 | -0.02330 |
| 336 |    | 5PX  | -0.00550 | 0.00340  | -0.00066 | -0.00336 | -0.00948 |
| 337 |    | 5PY  | 0.00166  | -0.00068 | -0.00009 | -0.00004 | 0.02812  |
| 338 |    | 5PZ  | 0.01178  | -0.00686 | -0.00013 | -0.00110 | -0.07942 |
| 339 | 51 | H 1S | 0.00150  | -0.00086 | 0.00018  | 0.00113  | -0.02097 |
| 340 |    | 2S   | 0.00921  | -0.00543 | 0.00058  | 0.00299  | -0.07721 |

|     |    |   |     |          |          |          |          |          |
|-----|----|---|-----|----------|----------|----------|----------|----------|
| 341 | 52 | N | 1S  | 0.00006  | 0.00011  | -0.00014 | 0.00003  | 0.00077  |
| 342 |    |   | 2S  | 0.00015  | 0.00029  | 0.00011  | -0.00003 | -0.00113 |
| 343 |    |   | 3S  | -0.00354 | -0.00642 | 0.00283  | -0.00041 | -0.01072 |
| 344 |    |   | 4PX | -0.00054 | -0.00095 | -0.00092 | 0.00015  | -0.01220 |
| 345 |    |   | 4PY | -0.00072 | -0.00124 | -0.00088 | 0.00015  | -0.01720 |
| 346 |    |   | 4PZ | 0.00088  | 0.00154  | -0.00130 | 0.00022  | -0.00399 |
| 347 |    |   | 5PX | 0.00218  | 0.00383  | -0.00073 | -0.00006 | -0.01985 |
| 348 |    |   | 5PY | -0.00062 | -0.00119 | -0.00129 | 0.00034  | -0.02534 |
| 349 |    |   | 5PZ | -0.00804 | -0.01379 | -0.00005 | 0.00006  | -0.00911 |
| 350 | 53 | H | 1S  | 0.00081  | 0.00141  | -0.00115 | 0.00019  | 0.00199  |
| 351 |    |   | 2S  | 0.00598  | 0.01032  | -0.00400 | 0.00058  | 0.00624  |
| 352 | 54 | N | 1S  | -0.00151 | -0.00262 | 0.00055  | -0.00009 | 0.00382  |
| 353 |    |   | 2S  | 0.00325  | 0.00566  | -0.00131 | 0.00021  | -0.00941 |
| 354 |    |   | 3S  | 0.00730  | 0.01265  | -0.00070 | 0.00013  | -0.02345 |
| 355 |    |   | 4PX | -0.00750 | -0.01305 | 0.00180  | -0.00029 | 0.07356  |
| 356 |    |   | 4PY | 0.00223  | 0.00388  | -0.00254 | 0.00042  | 0.06704  |
| 357 |    |   | 4PZ | -0.00184 | -0.00320 | -0.00261 | 0.00043  | 0.00721  |
| 358 |    |   | 5PX | -0.00817 | -0.01425 | 0.00216  | -0.00035 | 0.06855  |
| 359 |    |   | 5PY | 0.00420  | 0.00734  | -0.00496 | 0.00081  | 0.06899  |
| 360 |    |   | 5PZ | -0.01469 | -0.02555 | -0.00301 | 0.00048  | 0.00465  |
| 361 | 55 | C | 1S  | 0.00406  | -0.00234 | 0.00049  | 0.00297  | 0.00052  |
| 362 |    |   | 2S  | -0.00609 | 0.00350  | -0.00095 | -0.00580 | -0.00103 |
| 363 |    |   | 3S  | -0.03427 | 0.01978  | -0.00636 | -0.03859 | -0.00470 |
| 364 |    |   | 4PX | -0.00917 | 0.00527  | -0.00187 | -0.01144 | -0.11523 |
| 365 |    |   | 4PY | -0.01206 | 0.00692  | -0.00101 | -0.00621 | 0.10282  |
| 366 |    |   | 4PZ | 0.00808  | -0.00464 | 0.00260  | 0.01590  | -0.04571 |
| 367 |    |   | 5PX | 0.05028  | -0.02884 | -0.00115 | -0.00694 | -0.07698 |
| 368 |    |   | 5PY | 0.04134  | -0.02374 | 0.00218  | 0.01336  | 0.06499  |
| 369 |    |   | 5PZ | 0.01139  | -0.00661 | 0.00489  | 0.02992  | -0.03348 |
| 370 | 56 | H | 1S  | -0.00677 | 0.00389  | -0.00113 | -0.00689 | -0.00317 |
| 371 |    |   | 2S  | -0.01714 | 0.00977  | 0.00358  | 0.02179  | -0.00623 |
| 372 | 57 | C | 1S  | -0.00216 | 0.00125  | -0.00022 | -0.00133 | 0.00080  |
| 373 |    |   | 2S  | 0.00383  | -0.00219 | 0.00034  | 0.00212  | -0.00127 |
| 374 |    |   | 3S  | 0.02858  | -0.01651 | 0.00392  | 0.02356  | -0.00729 |
| 375 |    |   | 4PX | -0.00538 | 0.00311  | 0.00070  | 0.00433  | -0.08718 |
| 376 |    |   | 4PY | 0.02015  | -0.01159 | 0.00088  | 0.00537  | 0.08770  |
| 377 |    |   | 4PZ | -0.00410 | 0.00235  | 0.00002  | 0.00011  | -0.04523 |
| 378 |    |   | 5PX | 0.02704  | -0.01563 | 0.00232  | 0.01406  | -0.10904 |
| 379 |    |   | 5PY | 0.04530  | -0.02613 | 0.00074  | 0.00426  | 0.10780  |
| 380 |    |   | 5PZ | -0.01485 | 0.00843  | -0.00208 | -0.01311 | -0.05710 |

|     |    |   |     |          |          |          |          |          |
|-----|----|---|-----|----------|----------|----------|----------|----------|
| 381 | 58 | H | 1S  | -0.00035 | 0.00020  | 0.00023  | 0.00142  | 0.00123  |
| 382 |    |   | 2S  | 0.00136  | -0.00087 | -0.00091 | -0.00581 | -0.00125 |
| 383 | 59 | C | 1S  | -0.00022 | 0.00013  | -0.00007 | -0.00043 | -0.00055 |
| 384 |    |   | 2S  | 0.00044  | -0.00023 | 0.00009  | 0.00057  | 0.00020  |
| 385 |    |   | 3S  | 0.00528  | -0.00342 | 0.00183  | 0.01060  | 0.01324  |
| 386 |    |   | 4PX | -0.00610 | 0.00350  | -0.00031 | -0.00193 | 0.22844  |
| 387 |    |   | 4PY | 0.00515  | -0.00295 | 0.00025  | 0.00151  | -0.20860 |
| 388 |    |   | 4PZ | 0.00431  | -0.00247 | 0.00137  | 0.00841  | 0.09980  |
| 389 |    |   | 5PX | 0.01167  | -0.00624 | -0.00075 | -0.00369 | 0.23430  |
| 390 |    |   | 5PY | -0.00771 | 0.00480  | -0.00056 | -0.00261 | -0.17990 |
| 391 |    |   | 5PZ | -0.05120 | 0.02948  | 0.00025  | 0.00153  | 0.11749  |
| 392 | 60 | C | 1S  | 0.00091  | -0.00052 | 0.00026  | 0.00158  | -0.00046 |
| 393 |    |   | 2S  | -0.00045 | 0.00027  | -0.00029 | -0.00177 | 0.00529  |
| 394 |    |   | 3S  | -0.02515 | 0.01448  | -0.00538 | -0.03277 | -0.04526 |
| 395 |    |   | 4PX | 0.00943  | -0.00541 | -0.00048 | -0.00291 | -0.06166 |
| 396 |    |   | 4PY | -0.01213 | 0.00696  | -0.00109 | -0.00673 | 0.06214  |
| 397 |    |   | 4PZ | 0.00408  | -0.00234 | -0.00017 | -0.00103 | -0.03520 |
| 398 |    |   | 5PX | -0.02125 | 0.01216  | -0.00094 | -0.00561 | -0.08193 |
| 399 |    |   | 5PY | -0.04559 | 0.02619  | -0.00178 | -0.01080 | 0.07066  |
| 400 |    |   | 5PZ | -0.00828 | 0.00479  | -0.00104 | -0.00627 | -0.04190 |
| 401 | 61 | H | 1S  | -0.00180 | 0.00104  | -0.00037 | -0.00224 | -0.00027 |
| 402 |    |   | 2S  | -0.00659 | 0.00372  | 0.00020  | 0.00113  | 0.01753  |
| 403 | 62 | C | 1S  | -0.00308 | 0.00177  | -0.00064 | -0.00390 | 0.00123  |
| 404 |    |   | 2S  | 0.00421  | -0.00241 | 0.00115  | 0.00704  | -0.00470 |
| 405 |    |   | 3S  | 0.03179  | -0.01830 | 0.00869  | 0.05281  | 0.02334  |
| 406 |    |   | 4PX | 0.00908  | -0.00522 | 0.00048  | 0.00292  | -0.14641 |
| 407 |    |   | 4PY | 0.00134  | -0.00077 | 0.00207  | 0.01262  | 0.13828  |
| 408 |    |   | 4PZ | 0.01770  | -0.01017 | 0.00390  | 0.02384  | -0.05920 |
| 409 |    |   | 5PX | -0.05342 | 0.03074  | -0.00298 | -0.01808 | -0.11175 |
| 410 |    |   | 5PY | -0.05147 | 0.02967  | -0.00145 | -0.00867 | 0.10605  |
| 411 |    |   | 5PZ | -0.01775 | 0.01030  | 0.00295  | 0.01817  | -0.02309 |
| 412 | 63 | H | 1S  | 0.00416  | -0.00239 | 0.00136  | 0.00835  | -0.00149 |
| 413 |    |   | 2S  | 0.02994  | -0.01729 | -0.00302 | -0.01857 | -0.01757 |
| 414 | 64 | C | 1S  | 0.00034  | -0.00019 | 0.00004  | 0.00027  | -0.00622 |
| 415 |    |   | 2S  | -0.00098 | 0.00064  | -0.00010 | -0.00046 | 0.01498  |
| 416 |    |   | 3S  | -0.01032 | 0.00510  | -0.00030 | -0.00313 | 0.09151  |
| 417 |    |   | 4PX | -0.00148 | 0.00085  | -0.00026 | -0.00151 | -0.08635 |
| 418 |    |   | 4PY | -0.00147 | 0.00083  | 0.00001  | 0.00004  | 0.11779  |
| 419 |    |   | 4PZ | 0.00163  | -0.00094 | -0.00001 | -0.00002 | -0.15949 |
| 420 |    |   | 5PX | -0.00335 | 0.00229  | -0.00068 | -0.00307 | -0.02388 |

|     |    |      |          |          |          |          |          |
|-----|----|------|----------|----------|----------|----------|----------|
| 421 |    | 5PY  | -0.00168 | 0.00156  | -0.00070 | -0.00301 | 0.06274  |
| 422 |    | 5PZ  | -0.00107 | 0.00063  | -0.00021 | -0.00085 | -0.09813 |
| 423 | 65 | C 1S | -0.00019 | 0.00014  | -0.00003 | -0.00005 | 0.00072  |
| 424 |    | 2S   | 0.00039  | -0.00023 | 0.00007  | 0.00032  | 0.00053  |
| 425 |    | 3S   | 0.00218  | -0.00120 | 0.00013  | -0.00123 | -0.03588 |
| 426 |    | 4PX  | 0.00053  | -0.00018 | -0.00006 | 0.00044  | 0.00543  |
| 427 |    | 4PY  | 0.00169  | -0.00097 | 0.00010  | 0.00055  | -0.02400 |
| 428 |    | 4PZ  | 0.00034  | -0.00024 | 0.00013  | 0.00055  | 0.01229  |
| 429 |    | 5PX  | 0.00166  | 0.00074  | -0.00070 | -0.00080 | -0.06337 |
| 430 |    | 5PY  | -0.00012 | 0.00033  | -0.00036 | -0.00093 | 0.01359  |
| 431 |    | 5PZ  | 0.00333  | -0.00141 | 0.00037  | 0.00062  | -0.02691 |
| 432 | 66 | H 1S | -0.00001 | 0.00002  | -0.00004 | -0.00021 | -0.02436 |
| 433 |    | 2S   | 0.00136  | -0.00073 | 0.00022  | 0.00000  | -0.05192 |
| 434 | 67 | H 1S | -0.00031 | 0.00026  | -0.00002 | 0.00016  | 0.03211  |
| 435 |    | 2S   | -0.00223 | 0.00043  | 0.00003  | -0.00021 | 0.09673  |
| 436 | 68 | C 1S | -0.00003 | -0.00002 | 0.00003  | 0.00001  | 0.00233  |
| 437 |    | 2S   | 0.00027  | 0.00008  | -0.00010 | 0.00008  | -0.00239 |
| 438 |    | 3S   | -0.00077 | -0.00034 | -0.00003 | -0.00015 | -0.03374 |
| 439 |    | 4PX  | -0.00016 | -0.00013 | 0.00015  | -0.00016 | -0.00990 |
| 440 |    | 4PY  | -0.00009 | 0.00022  | -0.00014 | -0.00004 | -0.00063 |
| 441 |    | 4PZ  | 0.00021  | -0.00016 | 0.00002  | -0.00002 | 0.00372  |
| 442 |    | 5PX  | -0.00243 | 0.00222  | -0.00115 | -0.00137 | 0.02831  |
| 443 |    | 5PY  | -0.00199 | -0.00057 | -0.00003 | -0.00033 | -0.00204 |
| 444 |    | 5PZ  | -0.00181 | -0.00020 | 0.00015  | 0.00023  | 0.04276  |
| 445 | 69 | H 1S | 0.00004  | 0.00003  | -0.00005 | -0.00006 | -0.00187 |
| 446 |    | 2S   | 0.00084  | 0.00031  | -0.00007 | -0.00052 | -0.01934 |
| 447 | 70 | H 1S | 0.00025  | -0.00009 | 0.00001  | 0.00013  | -0.00164 |
| 448 |    | 2S   | -0.00145 | -0.00006 | -0.00020 | -0.00052 | 0.01035  |
| 449 | 71 | C 1S | 0.00002  | -0.00001 | -0.00002 | -0.00002 | -0.00391 |
| 450 |    | 2S   | 0.00004  | 0.00015  | -0.00003 | 0.00006  | 0.00388  |
| 451 |    | 3S   | -0.00044 | -0.00049 | 0.00034  | 0.00029  | 0.08589  |
| 452 |    | 4PX  | -0.00007 | 0.00007  | -0.00015 | 0.00015  | -0.00120 |
| 453 |    | 4PY  | 0.00011  | -0.00018 | 0.00002  | 0.00003  | -0.00749 |
| 454 |    | 4PZ  | -0.00011 | 0.00001  | 0.00003  | 0.00004  | 0.00807  |
| 455 |    | 5PX  | 0.00213  | 0.00228  | -0.00055 | -0.00017 | -0.02933 |
| 456 |    | 5PY  | 0.00194  | -0.00016 | 0.00050  | 0.00038  | 0.00016  |
| 457 |    | 5PZ  | 0.00053  | 0.00114  | 0.00023  | -0.00035 | 0.00655  |
| 458 | 72 | H 1S | 0.00000  | -0.00001 | 0.00005  | -0.00002 | 0.00081  |
| 459 |    | 2S   | 0.00021  | 0.00039  | 0.00039  | -0.00040 | -0.01016 |
| 460 | 73 | H 1S | 0.00008  | -0.00006 | -0.00001 | 0.00007  | -0.00230 |



|     |    |      |          |          |          |          |          |
|-----|----|------|----------|----------|----------|----------|----------|
| 461 |    | 2S   | -0.00180 | -0.00050 | -0.00007 | -0.00043 | -0.01970 |
| 462 | 74 | C 1S | -0.00005 | -0.00008 | 0.00005  | 0.00000  | 0.00034  |
| 463 |    | 2S   | 0.00017  | 0.00038  | -0.00029 | 0.00003  | 0.00065  |
| 464 |    | 3S   | 0.00012  | -0.00100 | 0.00147  | -0.00020 | -0.00912 |
| 465 |    | 4PX  | -0.00035 | -0.00066 | 0.00061  | -0.00014 | -0.00011 |
| 466 |    | 4PY  | 0.00034  | 0.00056  | -0.00026 | 0.00006  | 0.00943  |
| 467 |    | 4PZ  | -0.00033 | -0.00063 | 0.00062  | -0.00006 | 0.00332  |
| 468 |    | 5PX  | 0.00004  | 0.00169  | -0.00172 | -0.00035 | -0.02401 |
| 469 |    | 5PY  | -0.00108 | -0.00175 | 0.00034  | 0.00021  | -0.02123 |
| 470 |    | 5PZ  | -0.00111 | -0.00048 | -0.00013 | -0.00019 | 0.02114  |
| 471 | 75 | H 1S | -0.00004 | -0.00009 | -0.00007 | 0.00002  | -0.01349 |
| 472 |    | 2S   | -0.00087 | -0.00100 | -0.00016 | -0.00001 | -0.04706 |
| 473 | 76 | H 1S | -0.00003 | -0.00005 | 0.00012  | -0.00002 | 0.00711  |
| 474 |    | 2S   | 0.00026  | -0.00046 | 0.00045  | 0.00004  | 0.00078  |
| 475 | 77 | C 1S | 0.00014  | 0.00020  | -0.00025 | 0.00004  | 0.00023  |
| 476 |    | 2S   | -0.00042 | -0.00087 | 0.00068  | -0.00004 | -0.00027 |
| 477 |    | 3S   | -0.00565 | -0.00783 | 0.00029  | -0.00052 | 0.00014  |
| 478 |    | 4PX  | 0.00071  | 0.00127  | -0.00128 | 0.00023  | -0.03626 |
| 479 |    | 4PY  | -0.00043 | -0.00079 | 0.00007  | -0.00003 | -0.06775 |
| 480 |    | 4PZ  | -0.00048 | -0.00081 | 0.00060  | -0.00008 | -0.01196 |
| 481 |    | 5PX  | 0.00319  | 0.00625  | -0.00219 | -0.00014 | -0.02409 |
| 482 |    | 5PY  | -0.00161 | -0.00350 | 0.00205  | -0.00004 | -0.02981 |
| 483 |    | 5PZ  | 0.00116  | 0.00215  | -0.00190 | 0.00039  | -0.00298 |
| 484 | 78 | C 1S | -0.00029 | -0.00050 | 0.00034  | -0.00006 | -0.00062 |
| 485 |    | 2S   | 0.00073  | 0.00125  | -0.00051 | 0.00010  | 0.00116  |
| 486 |    | 3S   | 0.00462  | 0.00827  | -0.00535 | 0.00073  | 0.01054  |
| 487 |    | 4PX  | 0.00061  | 0.00107  | -0.00006 | 0.00002  | 0.07492  |
| 488 |    | 4PY  | 0.00102  | 0.00176  | 0.00083  | -0.00014 | 0.10121  |
| 489 |    | 4PZ  | -0.00428 | -0.00744 | 0.00888  | -0.00146 | 0.00606  |
| 490 |    | 5PX  | -0.00179 | -0.00266 | -0.00075 | -0.00024 | 0.06704  |
| 491 |    | 5PY  | -0.00114 | -0.00219 | 0.00088  | 0.00009  | 0.10077  |
| 492 |    | 5PZ  | 0.03088  | 0.05349  | 0.00431  | -0.00066 | 0.01941  |
| 493 | 79 | C 1S | 0.00083  | 0.00144  | -0.00158 | 0.00026  | 0.00082  |
| 494 |    | 2S   | -0.00074 | -0.00128 | 0.00223  | -0.00036 | -0.00268 |
| 495 |    | 3S   | -0.01802 | -0.03160 | 0.02920  | -0.00474 | 0.00929  |
| 496 |    | 4PX  | -0.00183 | -0.00319 | -0.00666 | 0.00109  | -0.01353 |
| 497 |    | 4PY  | -0.00792 | -0.01378 | 0.00287  | -0.00047 | -0.02337 |
| 498 |    | 4PZ  | 0.00067  | 0.00116  | -0.00187 | 0.00030  | -0.00250 |
| 499 |    | 5PX  | 0.02045  | 0.03566  | -0.00973 | 0.00158  | -0.01682 |
| 500 |    | 5PY  | -0.02215 | -0.03859 | 0.00307  | -0.00049 | -0.03297 |

|     |    |      |          |          |          |          |          |
|-----|----|------|----------|----------|----------|----------|----------|
| 501 |    | 5PZ  | 0.00692  | 0.01206  | -0.00784 | 0.00124  | -0.01142 |
| 502 | 80 | H 1S | -0.00106 | -0.00185 | 0.00227  | -0.00037 | 0.00122  |
| 503 |    | 2S   | -0.00448 | -0.00775 | -0.00193 | 0.00028  | -0.00645 |
| 504 | 81 | C 1S | -0.00234 | -0.00408 | 0.00387  | -0.00063 | -0.00088 |
| 505 |    | 2S   | 0.00327  | 0.00567  | -0.00709 | 0.00117  | 0.00291  |
| 506 |    | 3S   | 0.02656  | 0.04639  | -0.05200 | 0.00843  | -0.00774 |
| 507 |    | 4PX  | -0.00656 | -0.01141 | 0.00712  | -0.00116 | -0.05632 |
| 508 |    | 4PY  | 0.00182  | 0.00317  | -0.00861 | 0.00141  | -0.06885 |
| 509 |    | 4PZ  | -0.01150 | -0.02001 | 0.02510  | -0.00411 | -0.00505 |
| 510 |    | 5PX  | 0.03662  | 0.06381  | -0.00840 | 0.00132  | -0.04427 |
| 511 |    | 5PY  | -0.02470 | -0.04308 | 0.00911  | -0.00145 | -0.05509 |
| 512 |    | 5PZ  | 0.00873  | 0.01528  | 0.02350  | -0.00389 | 0.01003  |
| 513 | 82 | H 1S | 0.00331  | 0.00575  | -0.00836 | 0.00137  | 0.00324  |
| 514 |    | 2S   | 0.01355  | 0.02364  | 0.02316  | -0.00383 | 0.01316  |
| 515 | 83 | C 1S | 0.00200  | 0.00347  | -0.00295 | 0.00048  | -0.00027 |
| 516 |    | 2S   | -0.00280 | -0.00488 | 0.00575  | -0.00094 | 0.00014  |
| 517 |    | 3S   | -0.01744 | -0.03042 | 0.03975  | -0.00643 | -0.00259 |
| 518 |    | 4PX  | 0.00630  | 0.01096  | -0.01121 | 0.00184  | -0.03805 |
| 519 |    | 4PY  | -0.00386 | -0.00671 | 0.00625  | -0.00103 | -0.04980 |
| 520 |    | 4PZ  | -0.00375 | -0.00653 | 0.01747  | -0.00286 | -0.00623 |
| 521 |    | 5PX  | -0.03152 | -0.05476 | 0.00182  | -0.00035 | -0.02848 |
| 522 |    | 5PY  | 0.01740  | 0.03024  | -0.00946 | 0.00158  | -0.02492 |
| 523 |    | 5PZ  | -0.00776 | -0.01363 | 0.02878  | -0.00467 | -0.01072 |
| 524 | 84 | H 1S | -0.00344 | -0.00600 | 0.00720  | -0.00118 | 0.00212  |
| 525 |    | 2S   | -0.00984 | -0.01699 | -0.02031 | 0.00326  | 0.00352  |
| 526 | 85 | C 1S | -0.00106 | -0.00184 | 0.00143  | -0.00023 | 0.00068  |
| 527 |    | 2S   | 0.00183  | 0.00316  | -0.00201 | 0.00034  | -0.00119 |
| 528 |    | 3S   | 0.01449  | 0.02544  | -0.02650 | 0.00420  | -0.00758 |
| 529 |    | 4PX  | 0.00042  | 0.00073  | 0.00726  | -0.00119 | -0.02629 |
| 530 |    | 4PY  | 0.00999  | 0.01739  | -0.00160 | 0.00026  | -0.04181 |
| 531 |    | 4PZ  | -0.00008 | -0.00014 | 0.00064  | -0.00010 | -0.00325 |
| 532 |    | 5PX  | -0.02020 | -0.03522 | 0.01215  | -0.00194 | -0.04343 |
| 533 |    | 5PY  | 0.02293  | 0.03991  | -0.00246 | 0.00037  | -0.04945 |
| 534 |    | 5PZ  | 0.00727  | 0.01258  | -0.01035 | 0.00180  | 0.00140  |
| 535 | 86 | H 1S | -0.00011 | -0.00019 | -0.00150 | 0.00025  | 0.00143  |
| 536 |    | 2S   | 0.00037  | 0.00068  | 0.00410  | -0.00073 | 0.00197  |

MO diagrams

HOMO for **1** (red line in the figure represents the repeating unit of the polymeric structure):

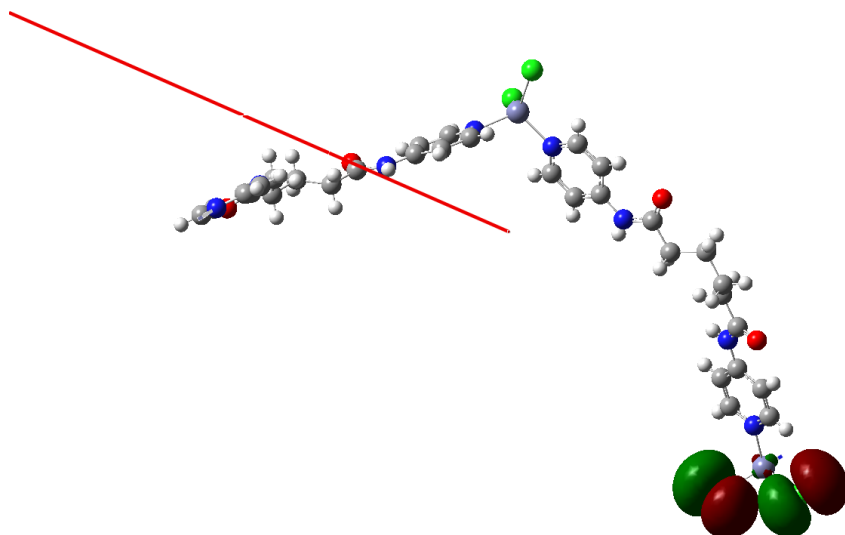

LUMO for **1** (red line in the figure represents the repeating unit of the polymeric structure):

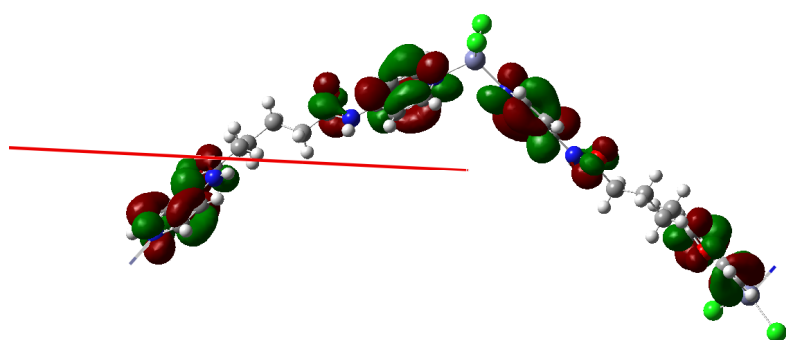

HOMO for **2** (red line in the figure represents the repeating unit of the polymeric structure):

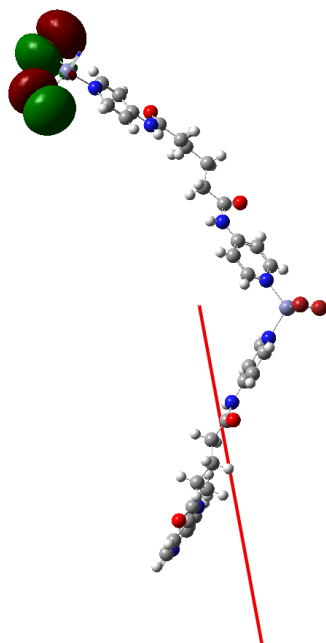

LUMO for **2** (red line in the figure represents the repeating unit of the polymeric structure):

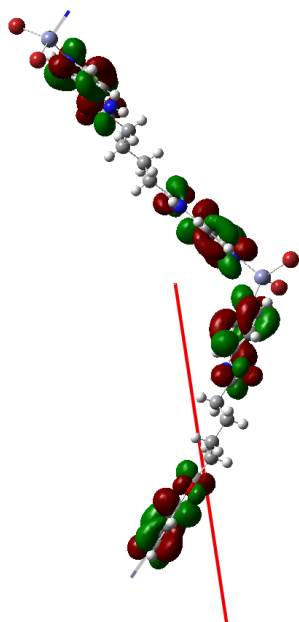

HOMO for **3** (red line in the figure represents the repeating unit of the polymeric structure):

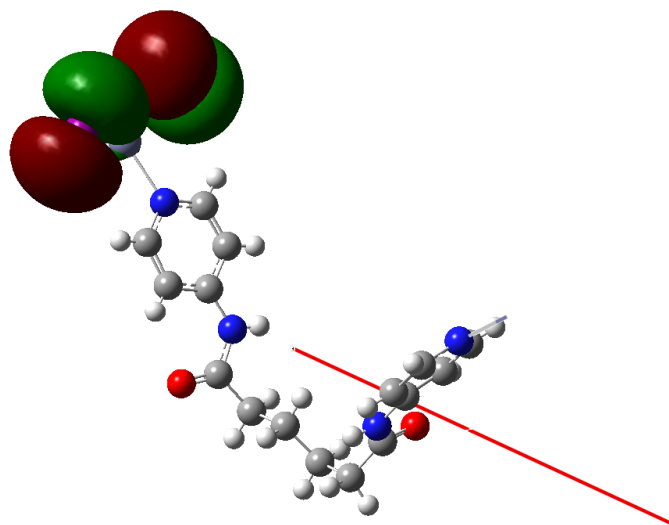

LUMO for **3** (red line in the figure represents the repeating unit of the polymeric structure):

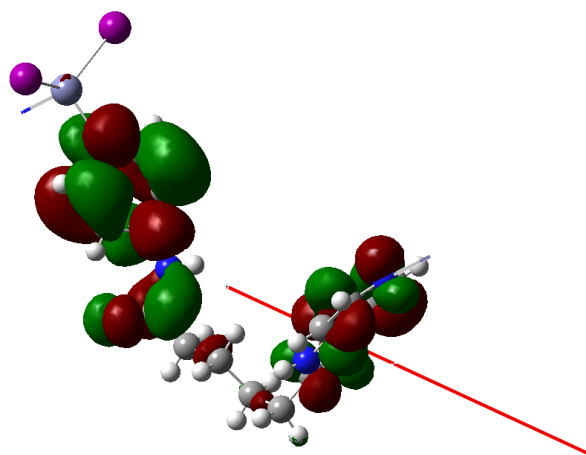

HOMO for **4**:

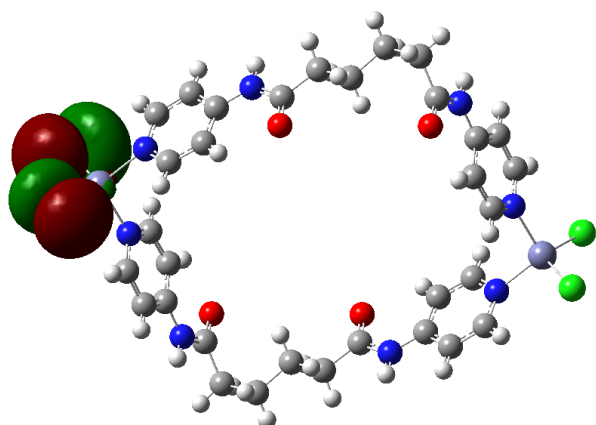

LUMO for 4:

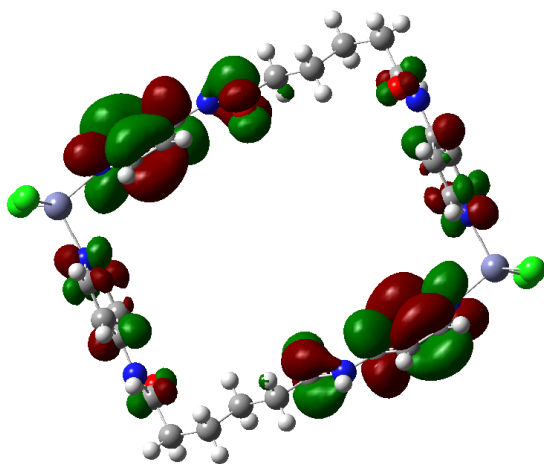

HOMO for 5:

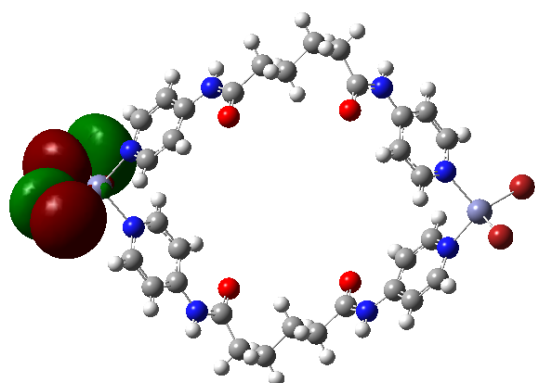

LUMO for 5:

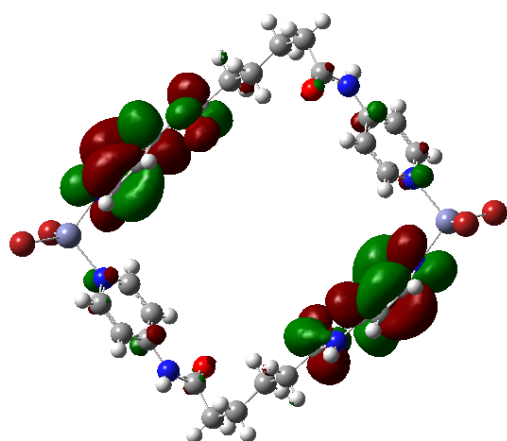

HOMO for 6:

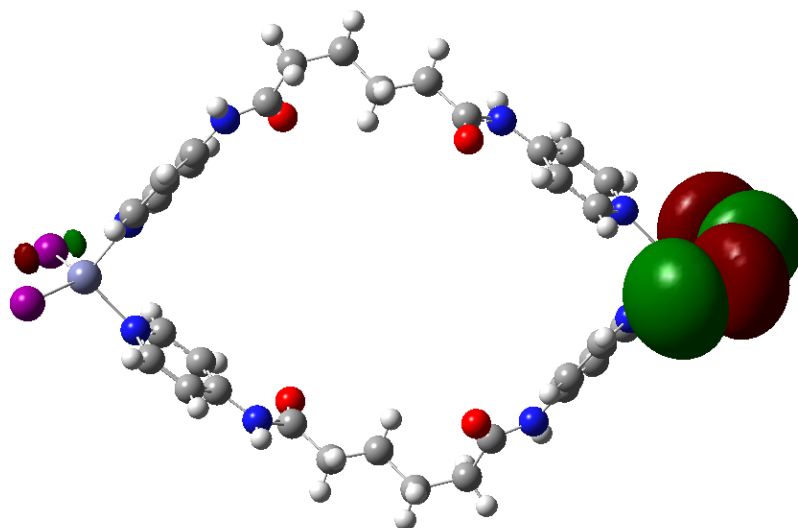

LUMO for 6:

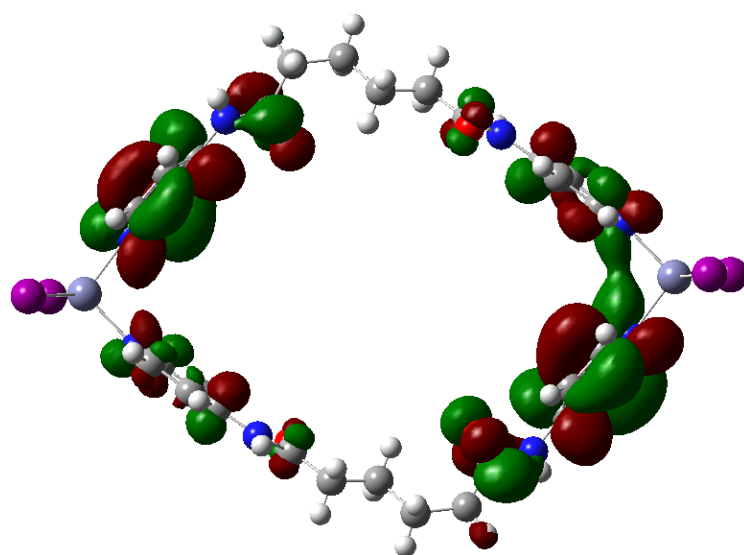

Supplement: b918484h.pdf [file b918484h.pdf]
